# Supplementary material for: LINC01133 Inhibits Invasion and Promotes Proliferation in an Endometriosis Epithelial Cell Line
Source: Int J Mol Sci. 2021 Aug 4;22(16):8385. doi: 10.3390/ijms22168385 (PMC8395043; doi:10.3390/ijms22168385)
Supplement: Supplementary file 1 [file ijms-22-08385-s001.zip › Supplementary Tables.xls]

## Sheet: Table S1
Table S1. Baseline characteristics of the study population
	n	Controls	Endometriosis	p-value
n	95	42	53
Age (years)	95	33,5±6,3	32,3±5,9	0,350 1
BMI (n)	93	24,6±5,0 (40)	22,5±4,8 (53)	0,040 1
Cycle Phase
Proliferative	36	14	22
Secretory	48	23	25
missing data	6	5	0	0.507
Staging
RAFS I+II	18		18
RAFS III+IV	35		35
Cigarette Smoking
no	60	20	40	0.153
yes	27	14	13
Gravidity
0	55	18	37	0.02
≥1	38	22	16
Parity
0	67	26	41	0.11
≥1	26	15	11
Hormonal Therapy
No	77	33	45
Yes*	12	4	8
missing data	6	5	0
Fisher´s Exact Test, TTEST 1, *hormonal therapy less then 3 months but more then 1 month prior surgery

## Sheet: Table S2A
Table S2A. Silencer® siRNAs seqences designed by Ambion and used for siRNA LINC01133 knockdown in 12Z cell line.
siRNA name	siRNA ID#	Sense sequence	Antisense sequence
LINC01133a	s444575	GAAGUUACCUGAGAAUGGAtt	UCCAUUCUCAGGUAACUUCaa
LINC01133b	Custom	AGAAAGAAAGAGAAAGAAAga	UUUCUUUCUCUUUCUUUCUuu
LINC01133c	Custom	GAGUAGAAGACAGUAUCAAga	UUGAUACUGUCUUCUACUCuu

## Sheet: Table S2B
Table S2B. List of RNA-sequencing samples with alignment details
sample_name	treatment	Cells	STAR.unique.aligned	STAR.total	STAR.perc
128259	control non-targeting control siRNA oligo (Cat. 4390846, Ambion)	12Z epithelial endometriosis cell line, 72 hours after transfection	37990673	40358359	94.13
128260	control non-targeting control siRNA oligo (Cat. 4390846, Ambion)	12Z epithelial endometriosis cell line, 72 hours after transfection	32502199	34543819	94.09
128261	control non-targeting control siRNA oligo (Cat. 4390846, Ambion)	12Z epithelial endometriosis cell line, 72 hours after transfection	34741578	36830173	94.33
128262	LINC01133a siRNA (Cat. S444575, Ambion)	12Z epithelial endometriosis cell line, 72 hours after transfection	41379198	44166169	93.69
128263	LINC01133a siRNA (Cat. S444575, Ambion)	12Z epithelial endometriosis cell line, 72 hours after transfection	35975541	38125222	94.36
128264	LINC01133a siRNA (Cat. S444575, Ambion)	12Z epithelial endometriosis cell line, 72 hours after transfection	30635527	32467011	94.36
total				3.77485e+07	94.16

## Sheet: Table S3
Table S3. List of RT-qPCR assays and Western blot antibodies used in this study
Target	Assay	ID number	base pair /kDa	Company
LINC01133	TAqMen QPCR	Hs04274447	115 bp	Thermofisher Scientific
CDH1	TAqMen QPCR	Hs01023894	61 bp	Thermofisher Scientific
CDH2	TAqMen QPCR	Hs00983056	66 bp	Thermofisher Scientific
FOXO1	TAqMen QPCR	Hs00231106	103 bp	Thermofisher Scientific
VCAM1	TAqMen QPCR	Hs01003372	62 bp	Thermofisher Scientific
SOX4	TAqMen QPCR	Hs00268388	143 bp	Thermofisher Scientific
TGFb2	TAqMen QPCR	Hs00234244	92 bp	Thermofisher Scientific
GAPDH	TAqMen QPCR	Hs99999905	122 bp	Thermofisher Scientific
p21 (12D1)	rabbit IgG	#2947	21kDa	Cell signaling technology
cyclinA (B8)	mouse IgG1	SC-271682	54kDa	Santa Cruz
TESK1(D49D4)	rabbit IgG	#4655	68kDa	Cell signaling technology
Cofilin (D3F9)	rabbit IgG	#5175	19kDa	Cell signaling technology
p-Cofilin Ser3(77G2)	rabbit IgG	#3313	19kDa	Cell signaling technology
α-Tubulin (B-5-1-2)	mouseIgG1	T5168	aprox. 50kDa	Sigma Aldrich
CDH1(4A2)	mouse IgG1	#14472	135 kDa	Cell signaling technology
AntiRabbit IgG HPR_linked		7074P2		Cell signaling technology
AntiMouse IgG HPR_linked		7076S		Cell signaling technology

## Sheet: Table S4
Table S4. List of differentially expressed (DE) genes in 12Z cells 72hrs after siRNA knockdown of LINC01133.
baseMean	log2FoldChange	lfcSE	stat	pvalue	padj	symbol
125.532	-2.87312	0.208352	-13.7898	2.93742e-43	1.19314e-41	AQP1
7786.52	-2.6821	0.0427036	-62.8073	0	0	YME1L1
474.491	-2.62749	0.0996583	-26.365	3.45625e-153	1.67905e-150	LINC01133
570.226	-2.60421	0.0985577	-26.4232	7.41529e-154	3.75245e-151	N4BP2
1184.92	-2.55814	0.128991	-19.8319	1.58084e-87	2.55991e-85	KCNAB1
377.763	-2.34455	0.115497	-20.2996	1.29671e-91	2.2181e-89	DIRAS3
309.375	-2.30348	0.132368	-17.4021	7.95541e-68	7.1043e-66	NDRG4
105.833	-2.09999	0.216839	-9.68454	3.50783e-22	5.63527e-21	MYH15
77.4481	-2.04023	0.21962	-9.28981	1.54558e-20	2.23731e-19	RGS7BP
2440.68	-2.0352	0.0492004	-41.3656	0	0	REEP5
255.654	-2.01655	0.133292	-15.1288	1.04568e-51	5.49773e-50	CDH1
2539.57	-1.96527	0.0564256	-34.8295	8.71528e-266	1.32309e-262	DRAM1
142.569	-1.95802	0.18344	-10.6739	1.34903e-26	2.69032e-25	RIPOR2
1029.32	-1.95768	0.0656263	-29.8308	1.55896e-195	1.18335e-192	ATF1
145.993	-1.95107	0.179379	-10.8768	1.48734e-27	3.0513e-26	ALOX15
241.693	-1.91558	0.135598	-14.1268	2.59562e-45	1.12184e-43	CXCL12
232.394	-1.89807	0.57694	-3.28989	0.00100228	0.00248573	AUXG01000058.1
257.254	-1.88689	0.134834	-13.9942	1.69096e-44	7.23123e-43	ADAMTS17
221.461	-1.88392	0.13669	-13.7824	3.25275e-43	1.31682e-41	AK5
1947.43	-1.87028	0.0496726	-37.6522	0	0	ARMT1
69.1191	-1.86013	0.227845	-8.16402	3.24052e-16	3.42227e-15	CHST11
724.226	-1.83306	0.0879531	-20.8413	1.82723e-96	3.41411e-94	SLPI
559.944	-1.8265	0.107989	-16.9137	3.56477e-64	2.86716e-62	PTCHD4
498.15	-1.826	0.0982694	-18.5816	4.52698e-77	5.13834e-75	LIN7A
617.206	-1.82014	0.0831882	-21.8798	4.04691e-106	1.02395e-103	PTGES
1228.92	-1.81112	0.136869	-13.2325	5.699e-40	2.04172e-38	CALB2
5002.53	-1.7987	0.0468303	-38.409	0	0	FNDC3A
606.347	-1.79608	0.210406	-8.53624	1.38664e-17	1.6131e-16	SERTM1
297.253	-1.78002	0.117779	-15.1132	1.32642e-51	6.91387e-50	PTX3
214.851	-1.7371	0.158069	-10.9895	4.29371e-28	9.10072e-27	UPK3B
314.668	-1.72854	0.123646	-13.9798	2.0721e-44	8.79918e-43	GRAMD1B
64.6886	-1.70982	0.22941	-7.45308	9.1183e-14	7.7172e-13	TGM2
108.708	-1.70913	0.189004	-9.04281	1.52702e-19	2.03574e-18	RASL11A
85.7425	-1.70427	0.202168	-8.42994	3.45835e-17	3.90713e-16	DOK5
665.555	-1.66782	0.198787	-8.39001	4.86084e-17	5.41604e-16	PLAT
671.601	-1.65856	0.0954361	-17.3788	1.19433e-67	1.05877e-65	LINC00707
101.025	-1.64426	0.184658	-8.90435	5.37013e-19	6.90161e-18	SBK2
113.676	-1.62257	0.173258	-9.36506	7.60093e-21	1.12577e-19	STAR
123.68	-1.61007	0.175042	-9.19819	3.6403e-20	5.08762e-19	FAM83A
620.683	-1.60908	0.0910366	-17.6751	6.52193e-70	6.23692e-68	TSPAN13
95.0573	-1.60787	0.198484	-8.10078	5.46058e-16	5.65377e-15	FAM78B
8468.6	-1.60708	0.0354534	-45.3295	0	0	IGFBP4
508.356	-1.59684	0.104948	-15.2155	2.79195e-52	1.50036e-50	PGM2L1
112.277	-1.5813	0.172051	-9.19086	3.89716e-20	5.44035e-19	TIE1
211.958	-1.57539	0.131105	-12.0163	2.9181e-33	7.89317e-32	SHE
1616.61	-1.56846	0.05121	-30.6281	5.1788e-206	4.49261e-203	CA12
846.391	-1.56352	0.0814117	-19.2051	3.35349e-82	4.33278e-80	TMEM255A
123.628	-1.5435	0.164763	-9.36803	7.38985e-21	1.09718e-19	SORCS2
65.3746	-1.53927	0.23573	-6.5298	6.58573e-11	4.30483e-10	PLCL1
166.699	-1.51377	0.159242	-9.50616	1.97838e-21	3.0453e-20	PDGFRA
911.326	-1.49696	0.0702269	-21.316	8.06713e-101	1.6606e-98	PLAA
77.8534	-1.4906	0.202234	-7.3707	1.69735e-13	1.40375e-12	CA9
1381.5	-1.48847	0.0671235	-22.1751	5.9742e-109	1.54376e-106	WNT4
149.535	-1.48717	0.15376	-9.67199	3.9661e-22	6.36304e-21	PLLP
147.053	-1.47773	0.185325	-7.9737	1.53993e-15	1.53048e-14	COLEC10
3907.76	-1.45824	0.0529556	-27.5369	6.34544e-167	3.66978e-164	MTSS1
62.8074	-1.45765	0.225726	-6.45763	1.06355e-10	6.7912e-10	TRPM3
2860.93	-1.44992	0.0438274	-33.0826	5.29551e-240	5.84673e-237	RRP1B
4728.87	-1.44737	0.172818	-8.37512	5.51695e-17	6.1326e-16	CEMIP
102.467	-1.44504	0.186831	-7.73447	1.03837e-14	9.67841e-14	GRIN2A
16051.2	-1.4449	0.0438108	-32.9804	1.55303e-238	1.5718e-235	TM4SF1
465.822	-1.44075	0.0936067	-15.3915	1.86685e-53	1.04483e-51	NTRK3
406.678	-1.43639	0.25534	-5.62541	1.85065e-08	9.45568e-08	SNCAIP
3755.3	-1.42348	0.0564378	-25.2222	2.28695e-140	9.5776e-138	ATP11C
848.477	-1.41979	0.0709346	-20.0154	4.0414e-89	6.72367e-87	APLN
1008.16	-1.40685	0.0619966	-22.6924	5.32764e-114	1.50475e-111	VAT1L
63.9529	-1.40537	0.221367	-6.34858	2.17315e-10	1.34247e-09	PLPPR3
1269.79	-1.39732	0.149348	-9.35614	8.27022e-21	1.22044e-19	HIPK2
101.876	-1.38246	0.179862	-7.68623	1.51531e-14	1.38894e-13	IL18R1
772.826	-1.37388	0.0825333	-16.6464	3.21613e-62	2.50384e-60	RARRES1
188.739	-1.37149	0.134371	-10.2067	1.85082e-24	3.32027e-23	NGEF
333.665	-1.3583	0.106911	-12.7049	5.5556e-37	1.77094e-35	USP2
108.905	-1.35628	0.185139	-7.32574	2.37589e-13	1.93919e-12	CBLN2
1467.44	-1.35042	0.0619586	-21.7954	2.56277e-105	6.35201e-103	ENPP2
166.514	-1.34791	0.167921	-8.02708	9.9821e-16	1.01027e-14	ELFN1
326.548	-1.34165	0.107811	-12.4444	1.50019e-35	4.49873e-34	PGF
226.331	-1.33984	0.132326	-10.1253	4.26604e-24	7.55262e-23	APCDD1L
93.8883	-1.33655	0.186509	-7.16613	7.71499e-13	5.98713e-12	OLFML2B
1670.78	-1.32141	0.0513611	-25.7279	5.70073e-146	2.47269e-143	STARD3NL
79.5769	-1.31876	0.212204	-6.21456	5.1468e-10	3.06712e-09	S100A4
553.352	-1.30654	0.220941	-5.91351	3.34897e-09	1.83792e-08	RIPOR3
195.902	-1.30038	0.130168	-9.99007	1.68463e-23	2.86954e-22	KLF2
174.334	-1.29979	0.147047	-8.83932	9.6307e-19	1.2222e-17	ANK3
646.635	-1.29659	0.0806753	-16.0717	4.02603e-58	2.64303e-56	H19
5599.2	-1.29565	0.0389586	-33.2571	1.61259e-242	1.95849e-239	IL1R1
124.597	-1.29497	0.164568	-7.86889	3.57815e-15	3.45442e-14	DOK7
102.211	-1.28485	0.187381	-6.8569	7.03692e-12	5.04209e-11	SGPP2
176.985	-1.28116	0.149395	-8.5757	9.84889e-18	1.16357e-16	SLC4A8
2642.5	-1.27096	0.0449274	-28.2891	4.70027e-176	2.85424e-173	DESI2
124.079	-1.26441	0.160195	-7.89294	2.95158e-15	2.87465e-14	LINC01119
605.933	-1.25722	0.084804	-14.8251	1.00901e-49	4.86288e-48	IPMK
1939.79	-1.25441	0.181358	-6.91677	4.62048e-12	3.36224e-11	SMPD3
1042.99	-1.25356	0.19785	-6.3359	2.35962e-10	1.45249e-09	IGSF10
1207.98	-1.25034	0.0603704	-20.7112	2.7454e-95	4.90336e-93	MGAT3
16029	-1.24956	0.0305301	-40.9287	0	0	PDIA3
537.637	-1.23775	0.0880157	-14.0628	6.43016e-45	2.7693e-43	ZBTB7C
126.038	-1.23089	0.164754	-7.47107	7.95468e-14	6.76064e-13	PCOLCE2
3365.74	-1.22968	0.0498994	-24.6431	4.36611e-134	1.60686e-131	ZMYND11
650.098	-1.22644	0.0787625	-15.5713	1.14066e-54	6.56554e-53	PDE7B
9733.74	-1.21928	0.0882965	-13.8089	2.2512e-43	9.20567e-42	PTGIS
32967.3	-1.21279	0.0371811	-32.6184	2.24823e-233	2.10037e-230	ALDH1A3
289.233	-1.21253	0.11781	-10.2922	7.63716e-25	1.40535e-23	DOCK4
154.121	-1.2121	0.152122	-7.96796	1.61312e-15	1.60191e-14	MAP2
900.323	-1.20006	0.0652353	-18.3959	1.4158e-75	1.54909e-73	PLCB1
162.328	-1.19924	0.154891	-7.74247	9.75036e-15	9.13016e-14	TENM4
1314.55	-1.19519	0.0610024	-19.5925	1.79135e-85	2.6212e-83	ZNF12
50.741	-1.19477	0.242942	-4.91793	8.74628e-07	3.62413e-06	SPN
300.487	-1.19333	0.11981	-9.96014	2.27746e-23	3.85233e-22	TMEM151A
169.44	-1.19282	0.148965	-8.00734	1.17218e-15	1.17946e-14	ZNF14
541.169	-1.1899	0.0831649	-14.3078	1.95666e-46	8.67287e-45	ARSJ
800.805	-1.18118	0.0726526	-16.2579	1.96483e-59	1.37936e-57	PMP22
169.071	-1.17912	0.137732	-8.56102	1.11878e-17	1.31154e-16	LINC01140
789.608	-1.17892	0.0753956	-15.6365	4.10989e-55	2.41133e-53	RGS4
88.5944	-1.17647	0.20493	-5.74081	9.42253e-09	4.95182e-08	AL139405.1
290.99	-1.16	0.120237	-9.64767	5.02857e-22	8.03579e-21	ARRDC4
9198.64	-1.15893	0.0397597	-29.1483	8.78752e-187	5.61707e-184	CDH2
2832.32	-1.15292	0.0484455	-23.7982	3.48626e-125	1.17613e-122	NCOA3
1817.92	-1.14663	0.0526352	-21.7845	3.25266e-105	7.9007e-103	TOB2
54.9965	-1.14183	0.237364	-4.81045	1.50589e-06	6.01812e-06	DGKB
165.229	-1.1411	0.141052	-8.08988	5.97254e-16	6.16283e-15	SERPINB9P1
12527.7	-1.13782	0.0308752	-36.8521	2.70447e-297	4.69226e-294	EIF4H
1862.78	-1.13718	0.0508433	-22.3664	8.36894e-111	2.20958e-108	SULF2
166.622	-1.13285	0.146997	-7.70659	1.2922e-14	1.19254e-13	GCNT4
7660.97	-1.12521	0.129559	-8.68493	3.7897e-18	4.62107e-17	NPY
109.867	-1.12157	0.183727	-6.10456	1.03083e-09	5.98444e-09	TMOD1
1006.37	-1.12109	0.210775	-5.31888	1.04407e-07	4.92438e-07	AHNAK2
419.19	-1.11759	0.0949181	-11.7743	5.29576e-32	1.3512e-30	ZNF829
75.8087	-1.11681	0.218146	-5.11958	3.06223e-07	1.34945e-06	CXCL1
2133.48	-1.11544	0.0523376	-21.3123	8.72836e-101	1.76677e-98	SOCS6
2552.19	-1.11424	0.0574068	-19.4095	6.41164e-84	8.65215e-82	NCEH1
374.708	-1.11127	0.101332	-10.9666	5.53259e-28	1.16051e-26	CYP2S1
633.188	-1.10139	0.0927648	-11.873	1.63551e-32	4.27168e-31	STON2
3343.86	-1.10005	0.0490103	-22.4453	1.4209e-111	3.83486e-109	GCLM
1346.65	-1.09674	0.0542492	-20.2167	6.9865e-91	1.17849e-88	LXN
533.746	-1.09605	0.0807027	-13.5813	5.1695e-42	2.01229e-40	TNFRSF8
391.463	-1.09262	0.226781	-4.81797	1.45027e-06	5.81114e-06	PAQR5
193.062	-1.09019	0.134398	-8.11168	4.99263e-16	5.18695e-15	MYCL
456.013	-1.08725	0.0865101	-12.5679	3.17218e-36	9.82808e-35	PFKFB4
136.632	-1.08659	0.152135	-7.14228	9.17978e-13	7.07863e-12	C7orf69
138.903	-1.08205	0.382622	-2.828	0.00468404	0.0101567	HMCN1
123.194	-1.08024	0.158658	-6.80861	9.85457e-12	6.99087e-11	FAM131B
3191.64	-1.0714	0.0444945	-24.0794	4.10971e-128	1.42607e-125	EI24
797.392	-1.06983	0.0803273	-13.3184	1.80845e-40	6.65563e-39	JCAD
96.6331	-1.0683	0.183853	-5.81063	6.22374e-09	3.32544e-08	GNG2
2464.25	-1.06815	0.049709	-21.4881	2.01141e-102	4.44156e-100	PER3
1298.61	-1.06516	0.0635711	-16.7555	5.16367e-63	4.09888e-61	MRGPRF
316.217	-1.06397	0.118217	-9.00014	2.25429e-19	2.95982e-18	OLFML1
1181.83	-1.06388	0.0710114	-14.9818	9.65905e-51	4.90833e-49	S1PR3
87.0222	-1.06127	0.18585	-5.71038	1.12723e-08	5.88322e-08	GDPD1
53.5306	-1.0593	0.235453	-4.49899	6.82762e-06	2.45912e-05	CD38
61.2798	-1.05473	0.218159	-4.83465	1.33377e-06	5.36913e-06	SGPP1
1339.19	-1.0544	0.055443	-19.0177	1.21804e-80	1.52506e-78	IFIT1
5359.79	-1.05364	0.042426	-24.8348	3.77597e-136	1.4331e-133	SLC2A3
282.152	-1.05204	0.110173	-9.54899	1.30973e-21	2.04193e-20	ZNF420
729.657	-1.04767	0.0791221	-13.2412	5.07386e-40	1.82314e-38	RCAN2
471.9	-1.04567	0.0898126	-11.6428	2.49625e-31	6.18714e-30	ZNF180
3236.19	-1.04564	0.153887	-6.79485	1.08428e-11	7.65618e-11	SLC6A6
312.885	-1.04372	0.113343	-9.20854	3.3058e-20	4.65765e-19	PPARGC1B
776.147	-1.04305	0.0742785	-14.0424	8.57177e-45	3.67859e-43	CXCL6
1030.68	-1.03961	0.0635446	-16.3604	3.66784e-60	2.62035e-58	CRABP2
2468.26	-1.03608	0.18571	-5.57904	2.41846e-08	1.22282e-07	ABCA1
850.8	-1.03451	0.0671775	-15.3997	1.64526e-53	9.25078e-52	ARHGAP28
85.1487	-1.03421	0.200391	-5.16096	2.45693e-07	1.10068e-06	PCDHAC2
245.374	-1.03136	0.133367	-7.73327	1.04822e-14	9.7628e-14	MAP1A
229.096	-1.03104	0.1299	-7.93714	2.06892e-15	2.03623e-14	EGLN3
535.15	-1.02846	0.0801924	-12.8249	1.18882e-37	3.88126e-36	OIP5
1163.93	-1.02804	0.0588285	-17.4751	2.21626e-68	2.00869e-66	MBTPS2
1382.18	-1.02644	0.0556792	-18.435	6.88819e-76	7.67496e-74	CD82
172.115	-1.02617	0.140105	-7.32428	2.40188e-13	1.95515e-12	NOTCH3
4734.73	-1.02361	0.121211	-8.44491	3.04286e-17	3.46675e-16	CRB2
1887.91	-1.01807	0.0573206	-17.7609	1.41842e-70	1.38925e-68	ANKRD33B
158.074	-1.01747	0.146085	-6.9649	3.28639e-12	2.42634e-11	AARD
79.2448	-1.01621	0.19314	-5.26152	1.42871e-07	6.62783e-07	CAVIN4
1577.07	-1.01352	0.0656458	-15.4392	8.92207e-54	5.06348e-52	ZNF37A
3040.43	-1.01115	0.0468797	-21.569	3.51547e-103	8.05572e-101	ELOVL2
74.6788	-1.00714	0.201084	-5.00856	5.48374e-07	2.34013e-06	PCAT7
436.057	-1.00537	0.0906185	-11.0945	1.33385e-28	2.90836e-27	MLPH
773.838	-1.00262	0.086237	-11.6263	3.03058e-31	7.4962e-30	FZD4
512.896	-0.993661	0.0855808	-11.6108	3.63244e-31	8.94849e-30	TFPI2
2889.24	-0.993284	0.0502114	-19.782	4.25203e-87	6.62063e-85	ITGB4
272.172	-0.99298	0.112958	-8.79071	1.48617e-18	1.85123e-17	PRR15
444.238	-0.991831	0.0928255	-10.6849	1.19785e-26	2.39669e-25	SLC7A7
699.544	-0.989191	0.0791245	-12.5017	7.30673e-36	2.21297e-34	TGFBR3
529.634	-0.988891	0.213813	-4.62503	3.74537e-06	1.40134e-05	TNFSF10
535.068	-0.987333	0.106201	-9.2968	1.44731e-20	2.10007e-19	KIAA1549L
253.662	-0.987309	0.11944	-8.26616	1.38344e-16	1.49882e-15	BX322639.1
125.928	-0.984698	0.159814	-6.16152	7.2051e-10	4.22938e-09	PRSS3
6492.51	-0.9832	0.0326999	-30.0674	1.29275e-198	1.0467e-195	SAR1A
2556.78	-0.980935	0.0541802	-18.1051	2.90745e-73	3.01803e-71	CCBE1
1276.53	-0.980601	0.0594374	-16.498	3.79002e-61	2.84134e-59	CD14
380.748	-0.979405	0.10478	-9.34728	8.99349e-21	1.32235e-19	TSHZ2
199.282	-0.978221	0.12721	-7.6898	1.47367e-14	1.35282e-13	PRDM6
4146.39	-0.97812	0.226606	-4.31639	1.58603e-05	5.39259e-05	SLC5A3
2018.84	-0.977576	0.0474626	-20.5968	2.9349e-94	5.16586e-92	EPHB2
174.675	-0.976949	0.135637	-7.20267	5.90448e-13	4.64743e-12	COL16A1
121.819	-0.973726	0.16201	-6.01028	1.85201e-09	1.04714e-08	ZFP37
1662.71	-0.969664	0.0490449	-19.7709	5.29826e-87	8.14524e-85	STAMBP
207.778	-0.969007	0.126515	-7.65921	1.87073e-14	1.70188e-13	TRIM47
150.542	-0.968521	0.147324	-6.57407	4.89573e-11	3.25444e-10	SMIM8
284.386	-0.968474	0.126556	-7.65255	1.9703e-14	1.78444e-13	GLT8D2
303.704	-0.968391	0.107445	-9.01291	2.00656e-19	2.64888e-18	PLAU
151.194	-0.967661	0.151727	-6.37765	1.79825e-10	1.12171e-09	COL6A3
69.5065	-0.967623	0.20473	-4.72634	2.286e-06	8.86445e-06	GPR146
1188.41	-0.967376	0.0554708	-17.4394	4.14607e-68	3.72993e-66	DCUN1D5
556.069	-0.966415	0.0829285	-11.6536	2.19999e-31	5.47518e-30	UPK1B
3117.02	-0.963903	0.0579491	-16.6336	3.97787e-62	3.03844e-60	CDON
83.36	-0.961167	0.188023	-5.11196	3.18836e-07	1.40249e-06	MIAT
376.879	-0.959842	0.095396	-10.0617	8.16145e-24	1.41804e-22	GET1
185.411	-0.959457	0.141792	-6.76663	1.31817e-11	9.22721e-11	SMTNL2
12031.2	-0.958072	0.0852179	-11.2426	2.51805e-29	5.7162e-28	NQO1
226.374	-0.956216	0.126165	-7.57909	3.47993e-14	3.07597e-13	RHOU
4610.14	-0.955337	0.0369289	-25.8696	1.463e-147	6.5808e-145	GPRC5B
122.477	-0.95467	0.156461	-6.10166	1.04974e-09	6.08256e-09	LINC00511
76.2369	-0.954152	0.219212	-4.35264	1.34506e-05	4.62115e-05	MYCN
469.492	-0.951363	0.0918337	-10.3596	3.78427e-25	7.05991e-24	TMEM37
2014.54	-0.95132	0.0626032	-15.196	3.75819e-52	2.0019e-50	IGFBP3
86.8361	-0.947951	0.222513	-4.26021	2.04234e-05	6.8065e-05	CXCL8
59.3525	-0.943814	0.224081	-4.21193	2.53194e-05	8.30194e-05	DGAT2
9447.48	-0.943431	0.0446912	-21.11	6.43522e-99	1.28124e-96	HMGCS1
542.332	-0.942923	0.0849178	-11.1039	1.20022e-28	2.63117e-27	CRISPLD2
205.314	-0.938704	0.13895	-6.75571	1.42141e-11	9.89851e-11	PODN
37062.9	-0.93794	0.048016	-19.5339	5.6556e-85	7.89509e-83	SCD
90.6621	-0.935383	0.188415	-4.96449	6.88807e-07	2.9128e-06	AL445253.1
758.744	-0.935059	0.0796153	-11.7447	7.51722e-32	1.89806e-30	MN1
1035.45	-0.933698	0.0602405	-15.4995	3.49636e-54	2.00299e-52	ZFP90
399.029	-0.933078	0.098	-9.5212	1.71184e-21	2.64171e-20	EVA1C
222.384	-0.932894	0.127382	-7.32359	2.41424e-13	1.96389e-12	ZNF699
2930.15	-0.931611	0.0545677	-17.0726	2.37494e-65	2.04565e-63	NRP1
251.816	-0.926246	0.114671	-8.0774	6.61604e-16	6.80371e-15	EEPD1
1557.82	-0.926121	0.202142	-4.58154	4.61557e-06	1.70695e-05	TNXB
693.983	-0.925511	0.072001	-12.8541	8.15215e-38	2.68363e-36	BMT2
79.9929	-0.924918	0.195842	-4.72278	2.32646e-06	9.01845e-06	MISP
11966.3	-0.923836	0.0467337	-19.7681	5.60717e-87	8.51238e-85	PRSS23
58.3285	-0.923487	0.227744	-4.05494	5.01469e-05	0.000157292	HKDC1
56.2616	-0.921771	0.231785	-3.97683	6.98405e-05	0.000213548	SLC38A3
4450.82	-0.918468	0.0366182	-25.0823	7.75801e-139	3.1407e-136	VTA1
853.433	-0.917638	0.0675962	-13.5753	5.6121e-42	2.17067e-40	METTL15
536.169	-0.914239	0.0817087	-11.189	4.61555e-29	1.02666e-27	IFFO2
575.208	-0.914087	0.0832893	-10.9748	5.0498e-28	1.06475e-26	INSYN2B
308.775	-0.913439	0.108493	-8.41937	3.78527e-17	4.26853e-16	ZNF440
110.503	-0.912436	0.174265	-5.2359	1.64181e-07	7.52159e-07	ZFPM1
2189.63	-0.911017	0.0561753	-16.2174	3.79978e-59	2.63705e-57	SNTB2
459.385	-0.910244	0.0988726	-9.20623	3.3777e-20	4.75344e-19	KANK4
365.415	-0.906346	0.0990407	-9.15125	5.62773e-20	7.79347e-19	ZNF25
2133.55	-0.904169	0.0474235	-19.0658	4.85401e-81	6.14082e-79	SLC39A10
128.885	-0.901863	0.155117	-5.81408	6.097e-09	3.26176e-08	BMERB1
1135.37	-0.897227	0.0750219	-11.9595	5.78836e-33	1.54845e-31	HTRA1
230.367	-0.895674	0.123742	-7.23823	4.54568e-13	3.62252e-12	ZNF670
88.0318	-0.89474	0.190401	-4.69925	2.61119e-06	1.00484e-05	KCNH3
250.001	-0.893917	0.318394	-2.80758	0.00499153	0.010762	PKHD1L1
210.078	-0.893165	0.124185	-7.1922	6.37563e-13	4.9924e-12	INHBB
77.0378	-0.891094	0.200619	-4.44171	8.92448e-06	3.16092e-05	LINC01358
2236.74	-0.889603	0.114972	-7.73755	1.01352e-14	9.4613e-14	C1R
2452.98	-0.889253	0.0472749	-18.8103	6.22213e-79	7.48195e-77	THUMPD1
189.414	-0.888766	0.137358	-6.47044	9.77201e-11	6.2761e-10	LRP4
322.673	-0.887149	0.103956	-8.53392	1.41472e-17	1.64419e-16	CHST15
97.5447	-0.887123	0.181975	-4.87498	1.08822e-06	4.441e-06	TSPAN18
1872.71	-0.886588	0.0529788	-16.7348	7.31293e-63	5.76725e-61	PIK3CA
3704.73	-0.885116	0.0409357	-21.6221	1.11261e-103	2.5986e-101	ZNF146
1543.11	-0.884437	0.0547608	-16.1509	1.11908e-58	7.50895e-57	VPS37A
159.361	-0.884231	0.142383	-6.21022	5.29103e-10	3.14998e-09	SLC7A8
766.062	-0.882283	0.0761976	-11.5789	5.27312e-31	1.28857e-29	SNHG14
53.1855	-0.879228	0.234887	-3.7432	0.000181688	0.00051484	NTM
138.375	-0.879118	0.164012	-5.36007	8.31886e-08	3.9574e-07	ARHGAP20
8796.41	-0.878278	0.139631	-6.29002	3.17432e-10	1.93244e-09	SERPINE2
2531.48	-0.877869	0.0514931	-17.0483	3.59929e-65	3.07841e-63	SUGT1
3722.29	-0.877449	0.0445876	-19.6792	3.24899e-86	4.81207e-84	ABI2
955.7	-0.876728	0.0627311	-13.976	2.18464e-44	9.24474e-43	ATP8B2
360.374	-0.876713	0.0976528	-8.97786	2.76082e-19	3.60927e-18	LPAR3
7134.59	-0.876206	0.037152	-23.5844	5.5749e-123	1.82992e-120	SLC44A1
99.225	-0.874146	0.181276	-4.82218	1.42e-06	5.69546e-06	TLCD4
149.126	-0.873378	0.142714	-6.11979	9.36993e-10	5.46055e-09	MAPK10
421.365	-0.872615	0.103441	-8.43585	3.28817e-17	3.72179e-16	MIR31HG
30655.3	-0.872536	0.032715	-26.6709	1.02545e-156	5.66096e-154	KRT19
151.274	-0.871999	0.14543	-5.99599	2.02247e-09	1.1377e-08	ZNF487
3126.08	-0.870374	0.0417426	-20.851	1.49297e-96	2.83314e-94	ARL5B
308.034	-0.868878	0.104302	-8.33037	8.05915e-17	8.88189e-16	SLC35G2
7487.89	-0.867552	0.0333129	-26.0425	1.63437e-149	7.63439e-147	UBE2D3
984.615	-0.867262	0.0659324	-13.1538	1.61813e-39	5.72951e-38	LARP6
7122.37	-0.865839	0.0346249	-25.0063	5.22454e-138	2.04684e-135	SPART
6786.74	-0.86491	0.0378229	-22.8673	9.82391e-116	2.84075e-113	CD46
59.1573	-0.864815	0.228288	-3.78827	0.000151702	0.000436696	B3GNT7
274.656	-0.864095	0.109077	-7.92188	2.33941e-15	2.29315e-14	ZNF850
374.403	-0.863619	0.102677	-8.411	4.06543e-17	4.56749e-16	SESN1
6164.25	-0.863506	0.0839685	-10.2837	8.34742e-25	1.5268e-23	LIFR
854.665	-0.859183	0.0701607	-12.2459	1.76614e-34	5.02338e-33	ATF7IP2
710.318	-0.855963	0.0718077	-11.9202	9.28758e-33	2.45746e-31	TLE3
3726.09	-0.8544	0.0467184	-18.2883	1.02599e-74	1.09304e-72	ZFP36L2
711.445	-0.852874	0.0707738	-12.0507	1.92318e-33	5.27247e-32	KLHL2
5824	-0.852703	0.0391986	-21.7534	6.41162e-105	1.52685e-102	ANO6
2125.16	-0.85255	0.142715	-5.97381	2.31782e-09	1.29783e-08	SPOCK1
946.949	-0.852349	0.0642523	-13.2656	3.66252e-40	1.33177e-38	TMEM19
4254.69	-0.850705	0.051573	-16.4952	3.97512e-61	2.96183e-59	WNT2B
54.0857	-0.848346	0.228901	-3.70618	0.000210411	0.000590171	CCN4
645.275	-0.845574	0.074946	-11.2824	1.60235e-29	3.6718e-28	OTUD1
1735.19	-0.844025	0.0566741	-14.8926	3.68085e-50	1.80988e-48	MET
112.17	-0.843561	0.17097	-4.93398	8.05699e-07	3.36262e-06	AC254633.1
58.6812	-0.842927	0.224742	-3.75064	0.000176385	0.000501684	ADORA1
2112.81	-0.84188	0.0494222	-17.0344	4.56061e-65	3.87333e-63	MEDAG
212.348	-0.841794	0.122374	-6.87884	6.03405e-12	4.34401e-11	Z99129.4
1683.59	-0.841356	0.0564966	-14.8922	3.70558e-50	1.81469e-48	VSIR
309.176	-0.840322	0.103564	-8.11406	4.89555e-16	5.09482e-15	SLC47A1
251.456	-0.840114	0.139833	-6.00799	1.87839e-09	1.06058e-08	FOXO1
114.558	-0.840039	0.160571	-5.23158	1.68065e-07	7.68506e-07	DRP2
104.679	-0.837859	0.176889	-4.73663	2.17298e-06	8.46525e-06	NRG1
4851.04	-0.837404	0.0362395	-23.1075	3.8929e-118	1.18198e-115	ENC1
784.094	-0.836059	0.0682632	-12.2476	1.73091e-34	4.93471e-33	PITPNM3
77.5185	-0.832988	0.198331	-4.19998	2.66936e-05	8.71489e-05	PPFIA2
402.807	-0.829192	0.118816	-6.97882	2.97678e-12	2.20445e-11	CCN3
1402.18	-0.829071	0.145202	-5.70978	1.13123e-08	5.90152e-08	BICDL1
320.186	-0.829009	0.11755	-7.0524	1.75863e-12	1.32497e-11	MAP2K6
8637.41	-0.828922	0.0340375	-24.3532	5.36105e-131	1.915e-128	PRKCI
98.3205	-0.826892	0.198503	-4.16564	3.10487e-05	0.000100369	PCDHGA6
616.417	-0.82575	0.0854066	-9.66846	4.10519e-22	6.57751e-21	RPP25
2224.61	-0.825681	0.0504062	-16.3805	2.63374e-60	1.91537e-58	SOAT1
72.0893	-0.825215	0.201669	-4.09192	4.27812e-05	0.000135731	ZNF844
164.22	-0.825206	0.145385	-5.67599	1.37887e-08	7.114e-08	BMP2
2134.63	-0.824871	0.0487108	-16.9341	2.52334e-64	2.05678e-62	ADAMTS15
661.302	-0.823583	0.0783626	-10.5099	7.77837e-26	1.50667e-24	UNKL
1177.36	-0.823364	0.0650004	-12.6671	9.00131e-37	2.85433e-35	RBAK
1126.62	-0.823243	0.0627809	-13.1129	2.77594e-39	9.71578e-38	APIP
289.957	-0.823188	0.113617	-7.24529	4.31519e-13	3.44563e-12	TPD52L1
5432.37	-0.822245	0.038358	-21.4361	6.1557e-102	1.3116e-99	MBNL1
5856.14	-0.82174	0.0353709	-23.2321	2.15892e-119	6.7231e-117	CDC27
132.763	-0.821147	0.152887	-5.37095	7.83211e-08	3.7361e-07	S1PR2
112.118	-0.820499	0.169414	-4.84317	1.27784e-06	5.15587e-06	MSC
2222.43	-0.819552	0.0464872	-17.6296	1.45929e-69	1.38461e-67	DDX50
83.7307	-0.819046	0.193296	-4.23728	2.26249e-05	7.48105e-05	GAPDHP1
1709.35	-0.818771	0.0525161	-15.5908	8.40096e-55	4.85855e-53	ST3GAL5
150.779	-0.81608	0.143399	-5.69097	1.26318e-08	6.54775e-08	PLPP3
301.065	-0.815894	0.103855	-7.85609	3.96297e-15	3.81381e-14	ZFP82
56.8863	-0.813809	0.223137	-3.64712	0.000265193	0.000730003	PAK6
301.289	-0.813105	0.104908	-7.75068	9.1404e-15	8.58547e-14	LBH
3406.96	-0.810414	0.0414192	-19.5662	3.00524e-85	4.29396e-83	DPY19L1
5182.91	-0.80926	0.040965	-19.7549	7.27594e-87	1.09094e-84	NDRG1
389.008	-0.80878	0.0931271	-8.68469	3.79779e-18	4.62166e-17	S1PR5
1001.81	-0.808728	0.0799292	-10.1181	4.59458e-24	8.09886e-23	NAV1
495.17	-0.806565	0.0942414	-8.5585	1.14342e-17	1.33914e-16	NPR1
1274.51	-0.80347	0.0577045	-13.9239	4.53717e-44	1.89361e-42	PXK
162.56	-0.802124	0.139178	-5.76331	8.24781e-09	4.36279e-08	ANGPTL2
211.806	-0.800424	0.127475	-6.27907	3.40605e-10	2.06523e-09	ZNF470
469.474	-0.799426	0.0874435	-9.1422	6.11919e-20	8.45478e-19	LACTB2
2470.32	-0.797788	0.0444179	-17.9609	3.9403e-72	3.95495e-70	SUCLA2
282.001	-0.79664	0.1163	-6.84986	7.39202e-12	5.29029e-11	ITGA11
220.629	-0.796042	0.121839	-6.53359	6.42135e-11	4.20643e-10	TNFRSF11A
4859.5	-0.795618	0.277065	-2.8716	0.00408401	0.00895151	FRAS1
110.761	-0.795176	0.174863	-4.54743	5.43051e-06	1.98715e-05	RGS2
236.182	-0.794262	0.120259	-6.6046	3.98582e-11	2.66269e-10	FP565260.3
379.02	-0.793726	0.0965664	-8.21948	2.04392e-16	2.1794e-15	GFOD1
1859.05	-0.792734	0.049574	-15.9909	1.47832e-57	9.55011e-56	EFNB1
2784.55	-0.792605	0.0476411	-16.637	3.76073e-62	2.89077e-60	SLC12A8
279.431	-0.791511	0.111849	-7.07661	1.47719e-12	1.11848e-11	CGN
115.739	-0.791056	0.199642	-3.96237	7.42103e-05	0.00022549	MED12L
24706.7	-0.789849	0.169337	-4.66436	3.09575e-06	1.17494e-05	MKI67
1681.16	-0.788785	0.0499761	-15.7832	4.05878e-56	2.47708e-54	MRFAP1L1
756.85	-0.788533	0.0719435	-10.9605	5.92015e-28	1.23753e-26	FZD7
1838.7	-0.788463	0.0487951	-16.1587	9.86923e-59	6.65899e-57	OSTF1
480.174	-0.787203	0.0910287	-8.64786	5.24746e-18	6.32246e-17	ENDOD1
93.6159	-0.787096	0.178189	-4.41721	9.99853e-06	3.51366e-05	TCN2
1129.83	-0.786484	0.0572726	-13.7323	6.50306e-43	2.60659e-41	ZNF260
348.82	-0.786229	0.0975596	-8.05896	7.69446e-16	7.87273e-15	ZNF700
758.194	-0.785915	0.0781048	-10.0623	8.10685e-24	1.41057e-22	PIP4K2B
1831.42	-0.784418	0.0520906	-15.0587	3.02514e-51	1.55023e-49	TMEM200A
310.219	-0.784264	0.104094	-7.53418	4.91413e-14	4.27522e-13	FIBCD1
77.6705	-0.78403	0.195796	-4.00432	6.21958e-05	0.000192206	FBP1
1268.8	-0.782366	0.0590807	-13.2423	4.99856e-40	1.80141e-38	CDCP1
1011.86	-0.781946	0.0617443	-12.6643	9.32915e-37	2.94292e-35	ACVR1
117.345	-0.781831	0.160398	-4.87431	1.09187e-06	4.4544e-06	IFITM1
81.4011	-0.78132	0.201341	-3.88058	0.000104206	0.000308829	NYAP1
100.028	-0.780928	0.179502	-4.35053	1.35807e-05	4.66189e-05	AFAP1L2
3495.73	-0.780529	0.0414085	-18.8495	2.96694e-79	3.63975e-77	GPBP1
2941.05	-0.780063	0.0435718	-17.9029	1.11867e-71	1.11363e-69	DSE
6664.66	-0.779375	0.0361829	-21.5398	6.59249e-103	1.4827e-100	XPOT
57.8123	-0.779013	0.224637	-3.46787	0.000524601	0.00137223	CLDN10
2950.39	-0.778892	0.0405309	-19.2172	2.656e-82	3.46851e-80	MCAM
1674.93	-0.778878	0.157448	-4.94688	7.54119e-07	3.16694e-06	MXRA5
54126.1	-0.776619	0.0583199	-13.3165	1.85502e-40	6.80641e-39	CCDC80
77.4576	-0.775901	0.198693	-3.90503	9.42151e-05	0.000281417	CFAP221
131.788	-0.77584	0.163767	-4.73745	2.16427e-06	8.43821e-06	CXCL2
54.475	-0.775445	0.238695	-3.24869	0.00115937	0.00283769	CXCL5
9554.6	-0.773378	0.0488101	-15.8446	1.53175e-56	9.49138e-55	MYLK
2532.02	-0.77262	0.0436819	-17.6874	5.24437e-70	5.05499e-68	RBM47
2050.08	-0.772234	0.0513051	-15.0518	3.3599e-51	1.71454e-49	TENT4B
166.261	-0.772144	0.14726	-5.24341	1.57636e-07	7.24361e-07	NID2
52.7883	-0.770974	0.23319	-3.3062	0.000945704	0.0023536	SH2B2
285.48	-0.770963	0.107506	-7.17132	7.42756e-13	5.77145e-12	PCDHGA12
2210.9	-0.770534	0.0508846	-15.1428	8.456e-52	4.46513e-50	CACNG4
55.3227	-0.769764	0.226536	-3.39798	0.000678858	0.00174344	LRFN1
921.687	-0.769611	0.0639471	-12.0351	2.32293e-33	6.32557e-32	CCDC34
346.232	-0.769437	0.103653	-7.42317	1.14352e-13	9.58456e-13	APOE
287.855	-0.768764	0.109217	-7.0389	1.9377e-12	1.4529e-11	PAQR8
54.143	-0.767942	0.232906	-3.29722	0.000976458	0.00242517	ZNF442
2160.08	-0.767912	0.0453465	-16.9343	2.5119e-64	2.05678e-62	NEO1
7047.9	-0.767716	0.0395277	-19.4222	5.00488e-84	6.9073e-82	SLC20A1
846.187	-0.76696	0.0667232	-11.4947	1.40341e-30	3.37514e-29	RAB27B
518.623	-0.76663	0.0849599	-9.02344	1.82268e-19	2.41137e-18	AKAP5
841.432	-0.766523	0.0645445	-11.8759	1.57964e-32	4.14357e-31	SRD5A1
1005.11	-0.764146	0.0665206	-11.4874	1.52721e-30	3.65118e-29	HRH1
266.577	-0.763501	0.121275	-6.29559	3.06234e-10	1.86989e-09	NEURL1B
111.516	-0.761118	0.171957	-4.42621	9.59033e-06	3.38196e-05	TMEM158
4628.58	-0.760608	0.0413371	-18.4001	1.31052e-75	1.44693e-73	LUZP1
253.661	-0.757947	0.127036	-5.9664	2.42543e-09	1.35496e-08	TMTC1
295.343	-0.757913	0.124532	-6.08607	1.15714e-09	6.68257e-09	LINC01914
2070.68	-0.757312	0.0497525	-15.2216	2.54318e-52	1.37275e-50	AASDHPPT
11571.9	-0.756766	0.145832	-5.18929	2.11098e-07	9.53434e-07	SFRP1
104.269	-0.754722	0.174089	-4.33526	1.45587e-05	4.97792e-05	ZNF30
1033.92	-0.753246	0.0685991	-10.9804	4.74727e-28	1.00445e-26	HMOX1
58.1115	-0.752438	0.218512	-3.44347	0.000574305	0.00149101	AC025449.1
834.703	-0.751142	0.0668311	-11.2394	2.6113e-29	5.90581e-28	CISD1
2821.48	-0.747782	0.0456158	-16.3931	2.14355e-60	1.56828e-58	DHRS3
745.621	-0.746994	0.0752579	-9.92579	3.21555e-23	5.37918e-22	TMEM41A
236.518	-0.74656	0.12159	-6.13997	8.25357e-10	4.83782e-09	BMF
2756.94	-0.744088	0.0416639	-17.8593	2.44724e-71	2.4164e-69	CHST3
610.165	-0.742092	0.0795699	-9.3263	1.09635e-20	1.59846e-19	ARHGEF3
5548.89	-0.741528	0.101435	-7.31038	2.66397e-13	2.15262e-12	C1S
316.014	-0.740906	0.100291	-7.38759	1.4951e-13	1.24114e-12	FDX1
236.471	-0.740174	0.116964	-6.32823	2.47997e-10	1.52503e-09	TSHZ3
4370.42	-0.739621	0.0469343	-15.7587	5.98981e-56	3.61921e-54	ST3GAL1
289.857	-0.739563	0.10424	-7.09482	1.29517e-12	9.86817e-12	ANKRD46
2952.24	-0.739434	0.0461644	-16.0174	9.65741e-58	6.27215e-56	PRKACB
2762.7	-0.736236	0.197964	-3.71904	0.000199985	0.000562097	TENM2
981.085	-0.735854	0.0700985	-10.4974	8.87639e-26	1.71662e-24	FGF7
150.751	-0.733672	0.141877	-5.17116	2.32639e-07	1.04567e-06	GALNT6
75.7859	-0.733401	0.205562	-3.56779	0.000360007	0.000968821	ERICH5
7507.37	-0.733135	0.0350147	-20.9379	2.41717e-97	4.73492e-95	LRRN4
403.962	-0.732864	0.0914593	-8.013	1.11941e-15	1.12823e-14	AFAP1L1
1963.82	-0.731792	0.0552024	-13.2565	4.13646e-40	1.49962e-38	RNF24
55.6645	-0.730569	0.22376	-3.26497	0.00109476	0.0026953	RCOR2
758.18	-0.7303	0.0730305	-9.99993	1.525e-23	2.60861e-22	GDPD5
64.0385	-0.730284	0.210295	-3.47267	0.000515304	0.00134995	PALM3
169.959	-0.72962	0.152234	-4.79275	1.64511e-06	6.51872e-06	AC010198.2
338.394	-0.727965	0.0999511	-7.28321	3.25958e-13	2.6217e-12	RAB7B
825.596	-0.727636	0.064885	-11.2142	3.47178e-29	7.75087e-28	CCNA1
162.93	-0.727115	0.153234	-4.74514	2.08366e-06	8.14486e-06	BCO2
1179.73	-0.726928	0.0655812	-11.0844	1.49358e-28	3.245e-27	CRTC3
1723.85	-0.726889	0.0487046	-14.9244	2.28568e-50	1.13304e-48	HABP4
1815.02	-0.725843	0.0495562	-14.6469	1.41056e-48	6.64001e-47	EPB41L1
455.169	-0.725552	0.0893036	-8.12456	4.49003e-16	4.6929e-15	CDH4
264.378	-0.725503	0.112277	-6.46175	1.035e-10	6.62978e-10	FBXO32
65.411	-0.725433	0.207776	-3.49141	0.000480478	0.0012639	AL353796.1
1239.75	-0.725174	0.0591649	-12.2568	1.54442e-34	4.42383e-33	ABHD10
322.7	-0.724843	0.102069	-7.10148	1.23428e-12	9.41602e-12	ZNF569
7118.02	-0.724571	0.0445693	-16.2572	1.98667e-59	1.38667e-57	INSIG1
1978.45	-0.723433	0.0500702	-14.4484	2.56696e-47	1.17202e-45	LIN7C
170.085	-0.722715	0.138486	-5.21868	1.80202e-07	8.20914e-07	PPFIA4
1907.49	-0.722709	0.0553613	-13.0544	5.99777e-39	2.0753e-37	COX7B
409.406	-0.721105	0.0971104	-7.42563	1.12248e-13	9.42776e-13	FGF18
2160.47	-0.719833	0.157559	-4.56866	4.90847e-06	1.80811e-05	GAS1
1263.06	-0.719168	0.149747	-4.80256	1.56646e-06	6.23965e-06	CEBPB
1787.64	-0.717529	0.0577361	-12.4277	1.84786e-35	5.52765e-34	ILDR2
121.833	-0.716894	0.159957	-4.48179	7.40178e-06	2.65467e-05	ZNF563
2382.01	-0.716445	0.0498946	-14.3592	9.33563e-47	4.21492e-45	IER5L
991.244	-0.715877	0.177638	-4.02997	5.57835e-05	0.000173537	CPXM1
6649.77	-0.715728	0.0380125	-18.8287	4.39202e-79	5.3341e-77	FSCN1
331.597	-0.715428	0.105917	-6.75463	1.43195e-11	9.96053e-11	KCNJ12
5105.55	-0.715313	0.0350259	-20.4224	1.05722e-92	1.83429e-90	CAVIN2
941.014	-0.715223	0.0649764	-11.0074	3.51938e-28	7.51192e-27	SLC8A1
731.355	-0.715206	0.0781335	-9.15365	5.50432e-20	7.63128e-19	HIVEP3
397.564	-0.714736	0.0954357	-7.48919	6.92999e-14	5.92709e-13	CAMK2N1
1718.83	-0.714712	0.0500676	-14.2749	3.13631e-46	1.37511e-44	PFKFB3
20692.4	-0.713433	0.104842	-6.80481	1.0118e-11	7.16518e-11	DAB2
1983.26	-0.713356	0.0596664	-11.9558	6.05837e-33	1.61712e-31	CSPG4
3664.27	-0.711568	0.0390473	-18.2232	3.37656e-74	3.56595e-72	MMP15
52.8604	-0.710538	0.234165	-3.03434	0.0024106	0.00553853	GFRA3
75.1568	-0.709373	0.199368	-3.55811	0.000373536	0.00100234	EVI2B
285.161	-0.707943	0.108718	-6.51171	7.43016e-11	4.83597e-10	OSBP2
126.177	-0.707652	0.156974	-4.50808	6.5418e-06	2.36178e-05	CORO1A
339.39	-0.707362	0.103907	-6.80762	9.92264e-12	7.03505e-11	RETREG1
68.2524	-0.706923	0.205855	-3.43408	0.000594573	0.00153869	AL441992.1
607.129	-0.706563	0.0970911	-7.27732	3.40521e-13	2.73701e-12	TNFRSF11B
2974.08	-0.706356	0.0402236	-17.5607	4.92304e-69	4.59925e-67	CD9
54.8731	-0.70485	0.227376	-3.09994	0.0019356	0.00454258	RPL17P50
2327.56	-0.70485	0.04313	-16.3424	4.924e-60	3.49719e-58	RCOR1
217.947	-0.70473	0.122821	-5.73787	9.58769e-09	5.03426e-08	ADGRD1
1735.41	-0.704276	0.050561	-13.9292	4.20848e-44	1.76248e-42	BTRC
2843.48	-0.701756	0.0474649	-14.7847	1.83746e-49	8.78582e-48	EMILIN2
73.6294	-0.700551	0.204822	-3.42029	0.000625555	0.0016144	RND1
329.559	-0.700234	0.113331	-6.17865	6.46506e-10	3.80786e-09	ADGRG1
674.818	-0.700224	0.0846526	-8.27173	1.32026e-16	1.43422e-15	PIANP
6188.94	-0.699651	0.0427626	-16.3613	3.61459e-60	2.59759e-58	VCAM1
281.065	-0.699255	0.108195	-6.4629	1.02713e-10	6.58284e-10	ZNF488
1397.3	-0.698914	0.0565565	-12.3578	4.4209e-35	1.30956e-33	SLC26A2
8399.64	-0.698743	0.0310898	-22.475	7.29379e-112	2.01325e-109	CTNNB1
2026.08	-0.698653	0.0532807	-13.1127	2.78502e-39	9.71956e-38	ATXN7L3B
554.298	-0.696052	0.0890867	-7.81319	5.57587e-15	5.29882e-14	ALDH1A1
1493.92	-0.695415	0.057946	-12.0011	3.50651e-33	9.44269e-32	LRRC8C
695.731	-0.694774	0.0752147	-9.23721	2.53016e-20	3.59822e-19	CDH3
115.173	-0.69465	0.182935	-3.79725	0.000146311	0.000422268	AC126474.2
781.605	-0.694451	0.0728972	-9.52644	1.62769e-21	2.51505e-20	KRT8P3
3225.71	-0.692279	0.126041	-5.49249	3.963e-08	1.95256e-07	BNC2
1188.78	-0.691725	0.0553084	-12.5067	6.86178e-36	2.08863e-34	RNF8
297.012	-0.691277	0.10544	-6.55614	5.52196e-11	3.64876e-10	ZNF607
2328.57	-0.691181	0.0613935	-11.2582	2.11003e-29	4.81697e-28	MYO10
291.714	-0.690077	0.108601	-6.35422	2.09486e-10	1.29674e-09	SUCLG2-AS1
117.292	-0.688959	0.168741	-4.08293	4.44712e-05	0.000140688	CHST7
929.602	-0.688377	0.0632832	-10.8777	1.47196e-27	3.02487e-26	BCL3
766.233	-0.687543	0.0755917	-9.09548	9.41673e-20	1.27783e-18	C1QTNF1
91.7667	-0.687535	0.17998	-3.82006	0.000133417	0.000388666	SYT1
3021.71	-0.68662	0.0448037	-15.3251	5.19875e-53	2.85696e-51	CDC42EP4
739.989	-0.685418	0.0694652	-9.86707	5.78302e-23	9.58183e-22	FOXP1
3336.24	-0.684803	0.0489385	-13.9931	1.71668e-44	7.31545e-43	ANOS1
56.2624	-0.684311	0.236668	-2.89144	0.00383484	0.00846186	AP002784.1
1041.91	-0.683517	0.0608049	-11.2411	2.56073e-29	5.80225e-28	EPHX1
146.738	-0.682775	0.142173	-4.80241	1.56767e-06	6.24242e-06	GNB1L
49.8433	-0.682367	0.237034	-2.87877	0.00399231	0.00877744	SLC30A3
178.838	-0.682226	0.136018	-5.0157	5.28419e-07	2.25973e-06	AC093157.1
153.241	-0.681955	0.150353	-4.53568	5.74187e-06	2.09411e-05	FAM174B
3980.3	-0.681189	0.0440777	-15.4543	7.0614e-54	4.02633e-52	OTUD4
2148.59	-0.680479	0.0475547	-14.3094	1.91166e-46	8.50445e-45	TBC1D2
878.876	-0.680477	0.0644479	-10.5585	4.63772e-26	9.05548e-25	ZNF268
378.122	-0.680472	0.0947007	-7.1855	6.69629e-13	5.23e-12	NMNAT2
759.454	-0.680034	0.0675276	-10.0705	7.4628e-24	1.30411e-22	TADA2B
131.575	-0.679079	0.151346	-4.48694	7.22522e-06	2.59463e-05	GIPC3
182.981	-0.677847	0.141256	-4.7987	1.59699e-06	6.34111e-06	PLAAT4
569.305	-0.677696	0.0852529	-7.94924	1.87657e-15	1.85292e-14	PHACTR1
1201.02	-0.677618	0.0619766	-10.9335	7.97534e-28	1.65573e-26	KREMEN1
51.0204	-0.677609	0.247918	-2.7332	0.00627228	0.013248	TMC5
407.976	-0.677559	0.100126	-6.76709	1.31401e-11	9.20336e-11	BMPER
65.9559	-0.677488	0.21642	-3.13043	0.00174549	0.00414205	CLIC5
8428.98	-0.675674	0.0398754	-16.9446	2.10929e-64	1.74268e-62	SQLE
1604.64	-0.675585	0.0503078	-13.429	4.08649e-41	1.53655e-39	MTAP
536.659	-0.675212	0.0815026	-8.28454	1.1857e-16	1.29151e-15	KCND3
488.421	-0.674783	0.0922515	-7.3146	2.58158e-13	2.09161e-12	ELFN2
1226.98	-0.67458	0.0548463	-12.2995	9.11729e-35	2.64903e-33	KDR
143.189	-0.672676	0.151299	-4.446	8.74838e-06	3.10579e-05	ZIK1
84.8596	-0.672448	0.185158	-3.63174	0.000281512	0.00077352	FAM174A
82.3098	-0.672424	0.228073	-2.94828	0.0031955	0.00717894	RSPO1
677.77	-0.671501	0.0725191	-9.25965	2.0511e-20	2.94452e-19	ARRDC3
858.666	-0.670909	0.0822963	-8.15236	3.56886e-16	3.76575e-15	RORB
3550.95	-0.670514	0.0490439	-13.6717	1.49835e-42	5.92752e-41	SH3PXD2A
5606.3	-0.670206	0.0342249	-19.5824	2.18514e-85	3.15935e-83	MAGT1
68.3468	-0.669656	0.208415	-3.21309	0.00131314	0.00318261	VWA5A
670.542	-0.669301	0.0712515	-9.3935	5.80411e-21	8.69184e-20	YARS2
2536.66	-0.66928	0.0487092	-13.7403	5.82071e-43	2.34859e-41	ID1
1047.24	-0.669033	0.075164	-8.90097	5.53608e-19	7.10038e-18	POMK
2177.66	-0.668635	0.0484026	-13.814	2.0977e-43	8.60695e-42	CTTNBP2NL
433.894	-0.668571	0.0904022	-7.39551	1.40863e-13	1.17338e-12	CCDC68
58.2597	-0.668312	0.221783	-3.01336	0.00258376	0.00590621	HAP1
919.359	-0.667685	0.070493	-9.47165	2.75454e-21	4.21334e-20	HCFC1R1
194.7	-0.667461	0.135777	-4.91588	8.83866e-07	3.65992e-06	GPR4
299.878	-0.666607	0.112925	-5.9031	3.56724e-09	1.94978e-08	EFCAB2
667.814	-0.664209	0.0727107	-9.13496	6.54307e-20	9.03019e-19	SHISAL1
63.4991	-0.66418	0.219671	-3.02351	0.00249857	0.00572658	CORO2B
326.067	-0.662794	0.108244	-6.12312	9.1759e-10	5.35775e-09	ZNRF2P2
3134.12	-0.66237	0.0398107	-16.638	3.6991e-62	2.8615e-60	METAP1
940.877	-0.661727	0.0638175	-10.3691	3.42894e-25	6.40683e-24	KCNAB2
659.629	-0.661437	0.0919476	-7.19363	6.3091e-13	4.94594e-12	CA11
58.9904	-0.661281	0.223145	-2.96345	0.00304207	0.00686091	HPDL
427.595	-0.661012	0.09018	-7.32992	2.30294e-13	1.88273e-12	TMEM68
1754.02	-0.660768	0.0519332	-12.7234	4.38249e-37	1.40067e-35	DNAJB4
246.627	-0.660674	0.115071	-5.74144	9.38736e-09	4.93761e-08	SMOX
74.5691	-0.660125	0.198606	-3.3238	0.000888002	0.00222458	IRAK2
19288.2	-0.659582	0.0360013	-18.321	5.62353e-75	6.04405e-73	BCAT1
68.9437	-0.659538	0.213254	-3.09273	0.00198323	0.00464181	AC093297.2
862.635	-0.65918	0.0740581	-8.90084	5.54233e-19	7.10038e-18	NRP2
133.699	-0.65829	0.150342	-4.37863	1.19429e-05	4.13238e-05	APOL3
8046.32	-0.657033	0.0419574	-15.6595	2.86033e-55	1.71127e-53	NUFIP2
227.853	-0.65699	0.116551	-5.63695	1.73091e-08	8.85506e-08	ZNF44
2770.32	-0.656343	0.0531047	-12.3594	4.33276e-35	1.28659e-33	ANKRD28
14599.7	-0.654348	0.0404854	-16.1626	9.26268e-59	6.28465e-57	GLS
235.733	-0.653652	0.126445	-5.16945	2.34789e-07	1.05454e-06	IRAK3
6541.6	-0.653254	0.0337531	-19.3539	1.89017e-83	2.49523e-81	PCNP
247.468	-0.652941	0.125784	-5.19099	2.09182e-07	9.45836e-07	RASGRF2
57.3102	-0.652333	0.221069	-2.95082	0.00316936	0.00712548	ZMYND10
1261.63	-0.649979	0.0544337	-11.9407	7.25677e-33	1.92431e-31	FAM162A
3368.91	-0.649952	0.0409571	-15.8691	1.03763e-56	6.49589e-55	PPP2R2A
3748.96	-0.649838	0.0455157	-14.2772	3.035e-46	1.33551e-44	TRIM33
1372.73	-0.649442	0.0629554	-10.3159	5.97164e-25	1.10726e-23	BDKRB1
370.049	-0.64916	0.0998744	-6.49976	8.0447e-11	5.21638e-10	RAMP1
174.874	-0.648808	0.136559	-4.75112	2.02292e-06	7.93041e-06	PPP2R2B
131.466	-0.648631	0.152527	-4.25256	2.11345e-05	7.02267e-05	RTN4RL2
3015.99	-0.647507	0.0395408	-16.3757	2.85274e-60	2.06229e-58	CLMP
210.023	-0.646956	0.129947	-4.97861	6.40413e-07	2.72047e-06	CFTR
272.875	-0.646526	0.110802	-5.83496	5.38032e-09	2.89389e-08	SCN1B
661.743	-0.646454	0.0728103	-8.87861	6.77032e-19	8.63714e-18	YEATS4
463.146	-0.646166	0.0855504	-7.55305	4.25181e-14	3.72034e-13	SLITRK4
469.649	-0.645451	0.0888668	-7.26312	3.78249e-13	3.03023e-12	TNFAIP3
8336	-0.645085	0.0345049	-18.6955	5.39011e-78	6.23456e-76	DAPK1
203.457	-0.644443	0.138749	-4.64468	3.40601e-06	1.28506e-05	KCNK5
2281.06	-0.643783	0.0501587	-12.8349	1.04531e-37	3.42193e-36	HIP1
242.297	-0.642593	0.119019	-5.39906	6.69897e-08	3.21577e-07	POT1-AS1
824.621	-0.641058	0.0659334	-9.72282	2.41007e-22	3.90792e-21	PRKAG1
355.994	-0.640642	0.111638	-5.73854	9.54968e-09	5.01647e-08	ZNF483
937.77	-0.640598	0.0668387	-9.58424	9.31431e-22	1.46342e-20	TTC33
254.163	-0.64036	0.112822	-5.67584	1.3801e-08	7.11734e-08	ZNF613
3256.78	-0.640139	0.0424336	-15.0857	2.0127e-51	1.03577e-49	FAM20B
1701.45	-0.639709	0.0490792	-13.0342	7.81753e-39	2.68963e-37	ORC1
96.7088	-0.6391	0.18841	-3.39208	0.00069365	0.0017773	CTSH
2803.58	-0.639004	0.0559798	-11.4149	3.523e-30	8.37315e-29	SEC24A
2714.94	-0.638787	0.0491442	-12.9982	1.2521e-38	4.25961e-37	SNX18
216.754	-0.638418	0.1342	-4.75721	1.96291e-06	7.70259e-06	PTCH1
782.03	-0.638339	0.0684184	-9.32992	1.05946e-20	1.55026e-19	ARMH4
188.588	-0.638291	0.129144	-4.94247	7.71372e-07	3.23268e-06	TFEB
959.419	-0.638257	0.0657609	-9.70572	2.85047e-22	4.60971e-21	STC1
968.035	-0.63775	0.0601768	-10.5979	3.04659e-26	5.97753e-25	DNAJC16
207.625	-0.636169	0.121279	-5.24551	1.55849e-07	7.1642e-07	BOC
1021.01	-0.636137	0.078607	-8.09263	5.83893e-16	6.03008e-15	NHSL2
6283.24	-0.635181	0.03631	-17.4933	1.6126e-68	1.48372e-66	KLF9
145.806	-0.634898	0.145614	-4.36015	1.2997e-05	4.47672e-05	ATOH8
2335.75	-0.634737	0.0442756	-14.336	1.30299e-46	5.81797e-45	NBL1
59.4698	-0.633805	0.216587	-2.92633	0.00342984	0.00763619	SLC45A1
300.598	-0.63288	0.104018	-6.08432	1.16986e-09	6.74962e-09	RAB20
2844.84	-0.632711	0.0492223	-12.8541	8.15363e-38	2.68363e-36	ALYREF
4485.42	-0.632685	0.0402739	-15.7096	1.30076e-55	7.82065e-54	MAPRE2
4201.03	-0.632495	0.0392575	-16.1115	2.11947e-58	1.40661e-56	ZNF24
60.2582	-0.632384	0.216516	-2.92072	0.00349225	0.00776234	ANK1
462.799	-0.632184	0.0871402	-7.25479	4.02289e-13	3.21434e-12	C14orf132
268.753	-0.631162	0.12702	-4.96902	6.72933e-07	2.84865e-06	SEMA3F
348.08	-0.630772	0.098527	-6.40203	1.53328e-10	9.6328e-10	STARD10
8042.8	-0.630736	0.0379814	-16.6064	6.26284e-62	4.75389e-60	PANK3
603.266	-0.630614	0.0854846	-7.37693	1.61979e-13	1.34283e-12	PCDHGC3
2226.04	-0.629795	0.0553399	-11.3805	5.23104e-30	1.22647e-28	SSBP3
3620.44	-0.629416	0.0392852	-16.0217	9.01531e-58	5.88661e-56	ATP1B1
66.9674	-0.628317	0.206853	-3.03751	0.0023854	0.00548583	AC021092.1
668.112	-0.627843	0.0747551	-8.39866	4.5162e-17	5.05058e-16	MAP3K8
881.052	-0.627608	0.0652518	-9.61824	6.69656e-22	1.06175e-20	ADCY7
3997.5	-0.62699	0.0421756	-14.8662	5.46561e-50	2.64461e-48	SSX2IP
108.297	-0.626159	0.165669	-3.77958	0.000157094	0.000451576	TIGAR
529.427	-0.625741	0.0789244	-7.92836	2.22065e-15	2.18202e-14	PAQR7
138.836	-0.624173	0.149188	-4.1838	2.86672e-05	9.32664e-05	PNMA8A
56.4155	-0.624059	0.227214	-2.74657	0.00602219	0.0127844	LYPD3
245.596	-0.624022	0.116766	-5.34422	9.08069e-08	4.30297e-07	ADGRF4
3528.76	-0.623843	0.041766	-14.9366	1.90403e-50	9.47723e-49	MPP5
15693.8	-0.623467	0.032517	-19.1736	6.15497e-82	7.86865e-80	ASPH
25410.6	-0.622862	0.0406936	-15.3062	6.95547e-53	3.80515e-51	IL6ST
138.868	-0.622838	0.149352	-4.17027	3.04234e-05	9.84789e-05	TGFB3
10256.1	-0.62277	0.0314516	-19.8009	2.92581e-87	4.6148e-85	RPA1
85582	-0.622193	0.0430062	-14.4675	1.94421e-47	8.91037e-46	KRT8
408.692	-0.621178	0.103666	-5.9921	2.07142e-09	1.16362e-08	LINC01963
4066.95	-0.62105	0.0426956	-14.546	6.1905e-48	2.85869e-46	WT1
273.088	-0.620404	0.112549	-5.51231	3.54146e-08	1.7577e-07	TMEM223
3526.43	-0.620294	0.0415756	-14.9197	2.4547e-50	1.21188e-48	KLHL5
975.417	-0.618583	0.0703457	-8.79347	1.45008e-18	1.81185e-17	TRIM2
833.567	-0.618528	0.0752158	-8.22337	1.97857e-16	2.11529e-15	ITGA2
504.329	-0.618369	0.0819409	-7.54652	4.4704e-14	3.90597e-13	PUDP
990.051	-0.617805	0.0720832	-8.57072	1.02844e-17	1.21267e-16	SLC16A2
218.817	-0.616918	0.125809	-4.90361	9.40913e-07	3.87072e-06	DEPP1
10064.5	-0.61673	0.0336153	-18.3467	3.50836e-75	3.80437e-73	SERINC1
2107.27	-0.615659	0.0454697	-13.54	9.08128e-42	3.47925e-40	LPGAT1
597.502	-0.61486	0.0755625	-8.13709	4.04877e-16	4.24998e-15	RAB3D
173.615	-0.614651	0.141565	-4.34183	1.41299e-05	4.83949e-05	HTRA3
2764.43	-0.613332	0.0481756	-12.7312	3.96736e-37	1.2747e-35	THRA
3052.52	-0.613113	0.117083	-5.23657	1.63587e-07	7.50006e-07	CDH11
3212.85	-0.612727	0.0392449	-15.6129	5.94516e-55	3.45474e-53	SERP1
3296.52	-0.612663	0.0474104	-12.9225	3.35852e-38	1.1299e-36	DOCK11
973.518	-0.610868	0.0636633	-9.5953	8.36761e-22	1.31809e-20	C2CD2
1108.41	-0.608272	0.0636894	-9.55061	1.28937e-21	2.01278e-20	SYT11
5483.13	-0.608019	0.0336587	-18.0643	6.09407e-73	6.21954e-71	CCNA2
66.902	-0.607456	0.211936	-2.86623	0.00415389	0.00909319	CDC42BPG
8202.55	-0.607349	0.0847065	-7.17004	7.49765e-13	5.82218e-12	SOD2
769.805	-0.606826	0.0736962	-8.23415	1.80837e-16	1.94017e-15	MGARP
513.288	-0.60678	0.0805461	-7.53333	4.9464e-14	4.30022e-13	PIR
74.5182	-0.606319	0.198017	-3.06195	0.00219902	0.00509776	LINC00842
360.692	-0.605384	0.0972996	-6.22186	4.91309e-10	2.93649e-09	C1orf226
701.101	-0.605375	0.0856546	-7.06763	1.57605e-12	1.18963e-11	IGSF9
516.106	-0.604982	0.0823361	-7.34771	2.01626e-13	1.66017e-12	GLRX
67.2428	-0.604879	0.206293	-2.93214	0.00336634	0.00751687	TLR6
715.21	-0.603948	0.0733928	-8.22898	1.88819e-16	2.02223e-15	C8orf88
90.3445	-0.603895	0.190137	-3.1761	0.00149269	0.00358558	AC073073.2
647.609	-0.603706	0.0715475	-8.43784	3.23252e-17	3.66221e-16	FUT8
785.232	-0.60329	0.080645	-7.48081	7.38642e-14	6.30415e-13	SPSB1
5637.66	-0.603231	0.0366391	-16.4642	6.63866e-61	4.91625e-59	TNFRSF1A
492.259	-0.602774	0.0975067	-6.18187	6.33469e-10	3.73289e-09	EXOSC5
8344.48	-0.602398	0.0350267	-17.1983	2.73632e-66	2.39084e-64	SSR1
657.576	-0.601311	0.075202	-7.99595	1.28579e-15	1.28845e-14	SELENOK
2979.12	-0.600019	0.041434	-14.4813	1.5901e-47	7.31504e-46	TSPYL1
10138.3	-0.599065	0.165011	-3.63047	0.00028291	0.000777011	C3
129.344	-0.598995	0.160383	-3.73478	0.000187878	0.000531016	AMPD3
1098.74	-0.598526	0.0693475	-8.63082	6.0911e-18	7.30993e-17	IGSF9B
2116.24	-0.598358	0.0532772	-11.231	2.871e-29	6.45708e-28	UBR1
657.108	-0.595545	0.0747535	-7.96678	1.62865e-15	1.61601e-14	PRICKLE2
671.059	-0.595199	0.085092	-6.99477	2.65689e-12	1.97237e-11	ENG
125.957	-0.595162	0.156381	-3.80585	0.00014132	0.000409431	FBXO36
4764.48	-0.594814	0.0458144	-12.9831	1.52557e-38	5.17544e-37	HK2
88.5103	-0.59459	0.182399	-3.25983	0.0011148	0.00273797	C2CD4C
129.702	-0.593976	0.151002	-3.93355	8.36993e-05	0.000252053	PRR3
887.914	-0.593781	0.0650281	-9.13115	6.77779e-20	9.34351e-19	ARRB1
6684.37	-0.593726	0.0369201	-16.0814	3.44722e-58	2.27535e-56	NAMPT
1130.67	-0.593074	0.0650487	-9.11738	7.69596e-20	1.05613e-18	SLC19A1
8468.06	-0.590939	0.0353893	-16.6982	1.35025e-62	1.05798e-60	LRRFIP1
342.733	-0.590495	0.120816	-4.88757	1.02088e-06	4.18587e-06	DCHS1
1003.71	-0.589756	0.0608763	-9.68777	3.39881e-22	5.46735e-21	PJA1
455.985	-0.589047	0.0937683	-6.28194	3.34369e-10	2.02944e-09	IFIT2
771.061	-0.588616	0.0773064	-7.61406	2.65609e-14	2.37193e-13	C1QL1
374.935	-0.588319	0.096709	-6.0834	1.17663e-09	6.78545e-09	PDGFD
242.236	-0.588146	0.114514	-5.136	2.80643e-07	1.24485e-06	SLC35E4
152.829	-0.588076	0.145916	-4.03025	5.57187e-05	0.000173425	RAMP2
183.562	-0.587954	0.131947	-4.45599	8.35065e-06	2.96881e-05	RNF128
300.742	-0.586922	0.108059	-5.43149	5.5885e-08	2.71381e-07	C1QL4
4600.69	-0.586803	0.0441749	-13.2836	2.88077e-40	1.05382e-38	SLC22A3
65.7119	-0.585985	0.213745	-2.74151	0.00611578	0.0129559	ASPHD2
412.597	-0.584791	0.0985252	-5.93545	2.93045e-09	1.61921e-08	TOX2
2482.59	-0.584598	0.0507153	-11.5271	9.63791e-31	2.32708e-29	FAM102B
1431.06	-0.584175	0.0534353	-10.9324	8.0706e-28	1.6698e-26	GFPT2
51.1209	-0.5839	0.236349	-2.4705	0.0134925	0.0263282	AC091938.1
1365.86	-0.583682	0.0551049	-10.5922	3.23894e-26	6.34466e-25	ENOPH1
461.526	-0.583508	0.0858848	-6.79407	1.0901e-11	7.69276e-11	NAPB
1661.61	-0.583447	0.0513641	-11.359	6.68742e-30	1.5619e-28	CXXC5
1062.68	-0.583146	0.067567	-8.63064	6.10122e-18	7.31484e-17	ZNF791
2955.28	-0.583006	0.0444558	-13.1143	2.72758e-39	9.57414e-38	KRT7
1104.87	-0.581683	0.0578804	-10.0497	9.21085e-24	1.59353e-22	MED20
1252.63	-0.580939	0.0608838	-9.54176	1.40428e-21	2.18654e-20	RCHY1
9860.87	-0.580025	0.0370814	-15.6419	3.77207e-55	2.22716e-53	CXADR
245.462	0.58033	0.115811	5.01101	5.4145e-07	2.3122e-06	PGPEP1
103.77	0.580474	0.172405	3.36692	0.000760128	0.0019281	KRTCAP2
1326.93	0.580739	0.0718774	8.07958	6.49924e-16	6.69493e-15	CLASRP
430.444	0.580958	0.0882173	6.58554	4.53249e-11	3.01628e-10	ABAT
199.593	0.581966	0.125787	4.62661	3.71692e-06	1.39198e-05	SAYSD1
241.58	0.582162	0.115153	5.05554	4.29165e-07	1.86084e-06	GPX7
2062.48	0.582959	0.0576582	10.1106	4.95779e-24	8.70121e-23	CEBPG
78.2264	0.583367	0.202029	2.88754	0.00388266	0.00855495	ZNF826P
267.945	0.583843	0.109883	5.31331	1.07649e-07	5.06548e-07	B3GALNT1
2475.03	0.584519	0.0435942	13.4082	5.41679e-41	2.018e-39	CEP57
429.781	0.58465	0.107973	5.4148	6.13584e-08	2.96044e-07	CCS
95.4585	0.585376	0.178384	3.28154	0.00103242	0.00255215	DHPS
233.579	0.585427	0.124867	4.68841	2.75332e-06	1.05553e-05	FAM229A
402.868	0.585882	0.119258	4.91274	8.98133e-07	3.71267e-06	ARVCF
411.001	0.586421	0.0888112	6.60301	4.02904e-11	2.69009e-10	DNAJC27
123.223	0.586471	0.154193	3.80348	0.000142679	0.000412876	AL390719.1
755.131	0.58788	0.070574	8.32998	8.08579e-17	8.90316e-16	HERC2P2
299.357	0.588442	0.115186	5.10864	3.24481e-07	1.42628e-06	LINC00472
775.249	0.588924	0.0696695	8.45311	2.83641e-17	3.24066e-16	C6orf141
180.929	0.590738	0.138666	4.26016	2.04279e-05	6.8065e-05	ADIRF-AS1
628.242	0.59123	0.0754617	7.83483	4.69464e-15	4.49656e-14	GPR137
596.566	0.591258	0.0785592	7.52626	5.22125e-14	4.52873e-13	TMEM63A
977.35	0.591988	0.0627689	9.43123	4.05319e-21	6.12263e-20	ADAMTS5
278.822	0.592315	0.109079	5.43012	5.63147e-08	2.73358e-07	YBEY
299.849	0.592452	0.115895	5.11199	3.18788e-07	1.40249e-06	PDCD6
1829.48	0.593744	0.0481927	12.3202	7.0519e-35	2.06873e-33	TSC22D2
737.692	0.593851	0.0880755	6.74253	1.55653e-11	1.079e-10	INPP5E
694.979	0.594098	0.0736079	8.07112	6.96588e-16	7.13929e-15	ZNF720
1185.43	0.594223	0.056776	10.4661	1.23641e-25	2.37222e-24	COX20
89362.6	0.59442	0.123387	4.81754	1.45341e-06	5.81987e-06	MT-CYB
78.3791	0.594632	0.200406	2.96713	0.00300595	0.00678575	PRSS53
226.746	0.595271	0.119342	4.98792	6.10318e-07	2.59626e-06	CCDC61
49.7556	0.595489	0.261131	2.28042	0.0225828	0.0415369	GDPD3
1099.77	0.596403	0.0638901	9.33482	1.01163e-20	1.48205e-19	CUL7
128.874	0.597097	0.17099	3.492	0.000479416	0.00126144	RGS11
4341.95	0.597179	0.0368963	16.1854	6.39839e-59	4.36564e-57	MAGI2-AS3
80.077	0.597745	0.191273	3.12508	0.00177754	0.0042074	DNAJC3-DT
152.03	0.597941	0.142631	4.19223	2.76223e-05	9.00599e-05	SNHG11
2789.82	0.597991	0.0509111	11.7458	7.42349e-32	1.8783e-30	GXYLT1
62.0614	0.598834	0.223817	2.67555	0.00746074	0.0155608	PRKG1-AS1
14470.1	0.599277	0.108372	5.52983	3.2054e-08	1.59613e-07	NEAT1
806.491	0.599301	0.0680023	8.81294	1.21901e-18	1.53737e-17	NUTM2B-AS1
764.924	0.599915	0.067157	8.93302	4.14525e-19	5.37289e-18	UBE2D1
4112.57	0.601041	0.037301	16.1133	2.05883e-58	1.37387e-56	OSTM1
2133.86	0.601743	0.0476385	12.6315	1.41637e-36	4.42205e-35	VPS26B
58.9935	0.602356	0.224611	2.68178	0.00732327	0.015303	LRRIQ1
511.031	0.603369	0.0857422	7.03702	1.96402e-12	1.4715e-11	ANKRD37
242.298	0.604548	0.11419	5.29423	1.19519e-07	5.60449e-07	MAGI2
1612.4	0.604882	0.0491794	12.2995	9.11467e-35	2.64903e-33	EIF5A2
577.447	0.605229	0.0813993	7.43531	1.04323e-13	8.77423e-13	PRKCD
1203.16	0.605273	0.191971	3.15295	0.00161631	0.00385509	MAN2C1
1535.18	0.605429	0.0548554	11.0368	2.539e-28	5.45772e-27	GUSB
57.4181	0.605781	0.229133	2.6438	0.0081981	0.0168899	LBX2
923.094	0.607343	0.0730991	8.30848	9.69338e-17	1.05869e-15	BCL2L2
59.4229	0.608229	0.218755	2.78041	0.00542905	0.0116289	AC093673.1
867.032	0.608655	0.075738	8.03632	9.25731e-16	9.39265e-15	NAT9
1532.6	0.609176	0.0542437	11.2304	2.89303e-29	6.49462e-28	LRRC1
1178.42	0.609661	0.0612071	9.96064	2.26608e-23	3.83842e-22	MBD6
1124.07	0.609719	0.0659989	9.23831	2.5041e-20	3.56533e-19	CDKN2B
2359.43	0.610063	0.0479349	12.7269	4.19025e-37	1.34276e-35	BSDC1
74.9767	0.61014	0.208234	2.93007	0.00338884	0.00755876	TMEM150A
662.347	0.610688	0.0751952	8.12136	4.60978e-16	4.80977e-15	HOXB9
228.307	0.610689	0.128951	4.73583	2.18163e-06	8.49229e-06	AC110079.1
1443.05	0.610949	0.0532125	11.4813	1.63802e-30	3.90841e-29	C2orf68
421.056	0.611783	0.0924701	6.61601	3.69025e-11	2.47341e-10	EML2
62.2469	0.611904	0.219099	2.79281	0.00522516	0.0112318	CPB1
124.04	0.613236	0.156961	3.90693	9.34771e-05	0.000279626	SLC16A13
118.092	0.613451	0.16922	3.62516	0.000288779	0.000790806	ALKBH6
355.536	0.613575	0.0958072	6.40427	1.51092e-10	9.5029e-10	TMEM170B
217.324	0.613891	0.123401	4.97475	6.53321e-07	2.77045e-06	FCSK
6722.77	0.614803	0.147955	4.15534	3.24803e-05	0.000104718	CCNL2
1499.91	0.614988	0.120181	5.11718	3.10134e-07	1.36569e-06	SIRT7
1095.56	0.615304	0.155166	3.96545	7.32577e-05	0.000222955	KIFC2
93.8144	0.615634	0.194818	3.16005	0.00157741	0.00377119	IL11RA
1002.11	0.616054	0.0708817	8.69129	3.58336e-18	4.37826e-17	FAM193B
212.043	0.616085	0.125613	4.90462	9.36077e-07	3.85509e-06	UPP1
389.92	0.617002	0.112622	5.47853	4.28886e-08	2.10713e-07	NSUN5P2
1692.2	0.617879	0.0538842	11.4668	1.93666e-30	4.61192e-29	ZFYVE26
1625.49	0.619737	0.0522776	11.8547	2.03386e-32	5.28933e-31	RASA2
139.65	0.620982	0.154237	4.02616	5.66958e-05	0.000176105	P2RY11
85.0033	0.621677	0.194574	3.19507	0.00139796	0.00337606	TTLL11
102.094	0.621717	0.172622	3.6016	0.000316264	0.000860637	MYL5
456.752	0.622331	0.0901823	6.90081	5.17086e-12	3.73588e-11	TSPAN31
87.1968	0.622778	0.187997	3.3127	0.000923984	0.00230285	PKD1P3
64.581	0.623434	0.212922	2.92799	0.0034116	0.00760255	TMEM178B
802.419	0.624169	0.0715945	8.71812	2.82858e-18	3.48408e-17	KLF12
127.941	0.624218	0.158962	3.92684	8.60708e-05	0.000258809	HAGHL
2139.96	0.626262	0.0449565	13.9304	4.14008e-44	1.73984e-42	ZBTB18
271142	0.626485	0.0962921	6.50609	7.71344e-11	5.01229e-10	MT-CO1
60.6924	0.626682	0.225522	2.77881	0.00545588	0.0116807	DPYSL4
781.338	0.628086	0.0704275	8.91818	4.74002e-19	6.12421e-18	SELENOW
163.245	0.628504	0.155379	4.04498	5.23265e-05	0.000163537	SCNN1D
375.315	0.629798	0.0969892	6.49348	8.38741e-11	5.41547e-10	ZNF789
62.5067	0.630583	0.212199	2.97166	0.00296195	0.00669138	TPTEP1
169.95	0.631741	0.146922	4.29986	1.70909e-05	5.76259e-05	AP006621.3
2765.49	0.631799	0.0437682	14.4351	3.11141e-47	1.41528e-45	GIPC1
659.568	0.631825	0.0718286	8.79628	1.41425e-18	1.77073e-17	TIMM17B
260.294	0.632197	0.114917	5.50133	3.76947e-08	1.86174e-07	GPR153
247.51	0.632746	0.123222	5.13499	2.82159e-07	1.25067e-06	ADAMTS6
643.488	0.63287	0.0839151	7.5418	4.63546e-14	4.03857e-13	PCDH10
626.893	0.633061	0.0781996	8.09544	5.7056e-16	5.90243e-15	SLC25A38
489.333	0.633467	0.0865387	7.32005	2.47884e-13	2.01375e-12	PHF11
16995.2	0.635359	0.0976983	6.50327	7.85909e-11	5.09875e-10	MT-ND3
66266.5	0.635399	0.169063	3.75836	0.000171034	0.000488065	MT-ND5
902.056	0.635413	0.0692198	9.17963	4.32573e-20	6.01787e-19	SPRY2
113.637	0.636335	0.172306	3.69306	0.000221572	0.000619473	WASH2P
175.232	0.636407	0.136556	4.66041	3.15583e-06	1.19587e-05	WASH3P
74.0126	0.636469	0.198225	3.21084	0.0013235	0.00320579	CALCRL
375.582	0.637048	0.111678	5.70432	1.16811e-08	6.07566e-08	PPOX
536.71	0.637551	0.0832143	7.66156	1.8369e-14	1.67235e-13	BTBD9
1620.41	0.638208	0.050714	12.5845	2.57108e-36	7.98614e-35	MON1B
176.095	0.639858	0.135854	4.7099	2.47837e-06	9.56765e-06	SNX10
1867.37	0.640614	0.0476353	13.4483	3.15003e-41	1.18811e-39	MFSD6
72.708	0.640935	0.20197	3.17342	0.00150654	0.00361743	LHX4
451.399	0.641465	0.092358	6.94541	3.7735e-12	2.77248e-11	CCDC130
753.165	0.642436	0.190893	3.36542	0.000764262	0.00193738	PIDD1
3014.19	0.643282	0.0405013	15.883	8.31106e-57	5.22994e-55	SNX25
336.465	0.643507	0.10222	6.29529	3.06828e-10	1.87258e-09	ARHGAP6
62.4337	0.644155	0.215268	2.99234	0.00276845	0.00628816	GDF6
64.8738	0.644856	0.215514	2.99218	0.00276995	0.00628922	C10orf88B
722.42	0.645059	0.0852492	7.56675	3.82687e-14	3.37499e-13	TEPSIN
347.435	0.645757	0.098654	6.54568	5.92251e-11	3.89647e-10	SLC25A14
94.3489	0.645891	0.179647	3.59534	0.000323967	0.000880759	HSD17B7P2
354.631	0.646137	0.0988336	6.53763	6.25004e-11	4.09864e-10	PARP16
1445.5	0.646467	0.0524736	12.3199	7.08234e-35	2.07265e-33	SLC25A4
50.0666	0.647471	0.237096	2.73084	0.00631722	0.0133384	AC005229.4
164.09	0.647855	0.145128	4.46403	8.04307e-06	2.86629e-05	TRAPPC6A
722.285	0.64807	0.0915246	7.08083	1.43296e-12	1.08635e-11	PAPLN
1332.69	0.649349	0.0530289	12.2452	1.78278e-34	5.05886e-33	PHF8
264.518	0.649779	0.11662	5.57176	2.52176e-08	1.27346e-07	ERV3-1
682.399	0.649878	0.0722328	8.99699	2.31992e-19	3.0427e-18	COX10-AS1
1200.09	0.650409	0.0637833	10.1972	2.04154e-24	3.657e-23	REXO1
612.923	0.650789	0.0751295	8.66224	4.62601e-18	5.59591e-17	REPS1
83.554	0.650845	0.186591	3.48809	0.000486485	0.00127887	RRN3P1
221.855	0.651462	0.120509	5.40593	6.44722e-08	3.09982e-07	TESK1
81.4754	0.651468	0.189239	3.44257	0.000576207	0.00149467	AQP11
361.686	0.652007	0.105142	6.2012	5.60359e-10	3.32141e-09	ZNF276
7268.07	0.653102	0.0345114	18.9242	7.20141e-80	8.9246e-78	MPRIP
94.0963	0.654224	0.179487	3.64497	0.000267425	0.000735812	PLD6
139.577	0.654425	0.147978	4.42246	9.7584e-06	3.43723e-05	GUSBP11
222.296	0.654767	0.122312	5.35327	8.63789e-08	4.10596e-07	CELSR3
563.331	0.655173	0.0861646	7.60373	2.87706e-14	2.5636e-13	LPIN3
3915.4	0.655181	0.0385034	17.0162	6.22898e-65	5.21731e-63	ID4
255.608	0.656097	0.128478	5.10667	3.27891e-07	1.44075e-06	PI4KAP2
171.205	0.656985	0.135583	4.84563	1.26208e-06	5.09572e-06	PPM1K
106.954	0.657563	0.16687	3.94057	8.12892e-05	0.00024516	NIFK-AS1
126.673	0.657648	0.167066	3.93644	8.26981e-05	0.000249223	CPA3
726.56	0.657711	0.220393	2.98427	0.00284258	0.00643817	SLC9A3-AS1
86.2827	0.657926	0.197554	3.33037	0.000867319	0.00217816	LIN7B
629.606	0.659019	0.0775497	8.49802	1.92859e-17	2.22017e-16	AC132008.2
290.014	0.661022	0.106655	6.19779	5.72622e-10	3.39244e-09	CAB39L
2144.6	0.663063	0.0575789	11.5157	1.09915e-30	2.64865e-29	CENPT
179.07	0.663067	0.144399	4.59189	4.39244e-06	1.62839e-05	PPP1R3E
86.7016	0.663118	0.193387	3.42897	0.000605886	0.0015673	SEMA3E
56.8485	0.663207	0.225897	2.93588	0.00332602	0.00743776	MIEF2
271.637	0.664301	0.11617	5.71834	1.07572e-08	5.62401e-08	NIPBL-DT
152.29	0.664503	0.141783	4.68676	2.77559e-06	1.06272e-05	TSNARE1
232.289	0.665022	0.134924	4.92885	8.27171e-07	3.44749e-06	ASB16-AS1
835.858	0.66655	0.0663788	10.0416	1.00019e-23	1.72546e-22	DUSP22
168.417	0.66669	0.149283	4.46595	7.97145e-06	2.84243e-05	TAF10
917.344	0.66753	0.0620094	10.765	5.03739e-27	1.02306e-25	CABLES2
1034.27	0.66759	0.0593462	11.2491	2.33998e-29	5.32192e-28	TMEM47
516.766	0.667791	0.0856693	7.79499	6.44157e-15	6.0929e-14	ARRDC1
86.9862	0.667923	0.184375	3.62264	0.000291609	0.000798014	MGST2
204.04	0.668774	0.140865	4.74762	2.05829e-06	8.05088e-06	HMGA2
632.414	0.669112	0.0749496	8.9275	4.35756e-19	5.64206e-18	MRAS
96.5797	0.669125	0.175586	3.81081	0.000138512	0.000402254	WDR17
344.295	0.671807	0.108262	6.20537	5.45675e-10	3.2407e-09	ARL2
1977.5	0.671945	0.0494486	13.5887	4.67036e-42	1.82973e-40	CARS2
103.022	0.672115	0.17346	3.87476	0.00010673	0.000315924	SNHG8
434.89	0.672236	0.105835	6.35171	2.12929e-10	1.31671e-09	PLEKHM1P1
162.956	0.673238	0.137848	4.8839	1.04006e-06	4.25879e-06	RTL5
352.44	0.673639	0.0982255	6.85809	6.9789e-12	5.00938e-11	SMIM20
149.753	0.673672	0.15001	4.49085	7.0938e-06	2.54894e-05	CDK5R1
96.7088	0.6741	0.17421	3.86947	0.000109073	0.000322075	DLX2
107.96	0.674962	0.167282	4.03488	5.46302e-05	0.000170255	BMS1P1
217.867	0.675031	0.12885	5.23887	1.61562e-07	7.41283e-07	P2RX4
600.291	0.675264	0.0775211	8.71071	3.01964e-18	3.7119e-17	ARHGAP42
687.426	0.675583	0.0827341	8.16571	3.19539e-16	3.37755e-15	BX255925.3
250.437	0.676043	0.113681	5.94682	2.73401e-09	1.51273e-08	CSAD
3244	0.676145	0.0475497	14.2198	6.90918e-46	3.0076e-44	CDC42EP1
93.0166	0.676756	0.177533	3.81201	0.000137844	0.000400506	FAM241A
274.468	0.676996	0.109418	6.18725	6.12219e-10	3.61292e-09	TMEM175
204.19	0.677052	0.140968	4.8029	1.56388e-06	6.2314e-06	HLA-F
142.859	0.67987	0.146815	4.6308	3.64259e-06	1.36636e-05	TMEM147-AS1
195.484	0.681034	0.132571	5.13712	2.78978e-07	1.23883e-06	TMEM143
259.565	0.681625	0.114547	5.95061	2.67138e-09	1.47895e-08	STAG3L2
55.8895	0.681972	0.226517	3.01068	0.0026066	0.00594612	IL21-AS1
263.246	0.683574	0.111424	6.13491	8.52073e-10	4.98479e-09	HEMK1
342.613	0.684871	0.102561	6.67767	2.42775e-11	1.65739e-10	FAAP24
83.307	0.686241	0.192338	3.56789	0.000359867	0.000968658	SYNPO2L
147.515	0.686363	0.148922	4.60887	4.0486e-06	1.50922e-05	EPHA5
102.61	0.686613	0.170836	4.01914	5.84106e-05	0.000181107	KAZN
218.719	0.687818	0.121067	5.68131	1.3367e-08	6.91112e-08	CHROMR
606.139	0.687863	0.079204	8.6847	3.7975e-18	4.62166e-17	SLC25A29
569.369	0.688965	0.091621	7.51973	5.489e-14	4.74139e-13	MAP11
910.818	0.690353	0.0629111	10.9735	5.1269e-28	1.07914e-26	LMBR1L
141.243	0.691439	0.150585	4.5917	4.3966e-06	1.62944e-05	NRSN2-AS1
955.08	0.691658	0.0616009	11.228	2.96974e-29	6.65452e-28	ZNF687
214.56	0.692238	0.121349	5.70453	1.16662e-08	6.07052e-08	SLC19A2
158.972	0.692772	0.140176	4.94215	7.72641e-07	3.23688e-06	FBXL19-AS1
220.371	0.693834	0.121782	5.69736	1.21673e-08	6.32045e-08	SPRYD4
64.1492	0.69424	0.215807	3.21695	0.00129563	0.00314331	DDX47
216.227	0.695209	0.121006	5.74525	9.17857e-09	4.83198e-08	PLPP6
1101.71	0.695318	0.0722432	9.62468	6.29009e-22	9.98604e-21	MAFK
1352.63	0.695997	0.0560185	12.4244	1.92665e-35	5.74918e-34	SMIM13
62.4004	0.696171	0.213681	3.25799	0.00112203	0.00275461	C1RL-AS1
78.3384	0.696976	0.192197	3.62636	0.000287442	0.000787675	AC015871.3
503.875	0.697296	0.0844616	8.25577	1.50927e-16	1.62645e-15	FBXW4
2387.13	0.697357	0.0478941	14.5604	5.01664e-48	2.32546e-46	CHMP3
65.3477	0.697598	0.214606	3.2506	0.00115163	0.00282027	AGER
130.458	0.699088	0.155823	4.48642	7.24309e-06	2.59951e-05	LMF1
512.608	0.69915	0.0907008	7.70831	1.27498e-14	1.17754e-13	STXBP2
831.186	0.699159	0.0693784	10.0775	6.94875e-24	1.21779e-22	MOB3A
59.8636	0.699614	0.223551	3.12955	0.00175077	0.00415294	AL162231.2
1919.43	0.701599	0.0632613	11.0905	1.39525e-28	3.0368e-27	EPS8L2
1146.32	0.701803	0.0607118	11.5596	6.60241e-31	1.60694e-29	ATF6B
97.4634	0.701943	0.180571	3.88736	0.000101341	0.000300998	MSTO2P
440.933	0.70253	0.222616	3.15579	0.00160065	0.00382074	ATG16L2
531.156	0.70359	0.0875648	8.03508	9.35213e-16	9.48094e-15	CAPN10
471.238	0.705409	0.0855708	8.24357	1.67148e-16	1.79647e-15	NNT-AS1
62.8285	0.70542	0.215613	3.27169	0.00106907	0.00263783	COLGALT2
81.8801	0.707177	0.188348	3.75463	0.000173598	0.0004948	LINC00467
392.319	0.707518	0.104706	6.7572	1.40682e-11	9.80252e-11	ARHGAP33
2259.77	0.707995	0.0452629	15.6418	3.77765e-55	2.22716e-53	SAMD4A
1086.59	0.709745	0.135174	5.2506	1.51607e-07	6.98773e-07	NDOR1
2019.31	0.70975	0.0466535	15.2132	2.88935e-52	1.54587e-50	PLAGL2
75.837	0.710488	0.197369	3.5998	0.000318457	0.000866411	LINC02604
749.489	0.711609	0.0694281	10.2496	1.1885e-24	2.1576e-23	PHYKPL
6874.69	0.711763	0.104074	6.83901	7.97422e-12	5.69687e-11	CDK6
125.367	0.713408	0.158501	4.50097	6.76455e-06	2.43713e-05	LTBP1
58.0272	0.716276	0.223549	3.20411	0.00135478	0.00327897	FAM184A
22587	0.717008	0.0384901	18.6284	1.89264e-77	2.16851e-75	RPLP0
594.742	0.717578	0.0997898	7.19089	6.43694e-13	5.03715e-12	RNF207
177.517	0.718325	0.141216	5.08672	3.64305e-07	1.59441e-06	COMTD1
240.329	0.718549	0.118341	6.07183	1.26459e-09	7.27545e-09	ETFRF1
118.238	0.72	0.160652	4.48175	7.40334e-06	2.65467e-05	ZNF674-AS1
1100.88	0.720041	0.0710175	10.1389	3.71181e-24	6.59063e-23	DMPK
61.884	0.720127	0.212432	3.38992	0.000699141	0.00179099	LIN37
868.829	0.721444	0.0671257	10.7476	6.07921e-27	1.23053e-25	WDR18
733.845	0.721452	0.0770224	9.36678	7.47769e-21	1.10887e-19	ALDH5A1
439.887	0.721679	0.195557	3.69037	0.000223931	0.000625349	AC009533.1
1104.85	0.723239	0.139037	5.20176	1.97411e-07	8.95278e-07	RIMKLB
761.306	0.723881	0.0819562	8.83254	1.02326e-18	1.29588e-17	MEG3
115.452	0.724275	0.165247	4.38299	1.17061e-05	4.05855e-05	TRIM36
61.438	0.726676	0.23178	3.13519	0.00171741	0.00408339	ZNF528-AS1
77.6028	0.72709	0.206355	3.52349	0.000425898	0.0011316	PI4KAP1
1779.62	0.728577	0.141629	5.14427	2.68564e-07	1.1952e-06	LENG8
61.3957	0.73008	0.214705	3.40038	0.000672921	0.00173002	C18orf32
78.6428	0.730693	0.199065	3.67063	0.000241951	0.00067089	KLF4
82.9108	0.731719	0.197678	3.70158	0.000214263	0.000600837	IDNK
50.7527	0.737136	0.234595	3.14217	0.00167703	0.00399128	OGFRP1
94.1421	0.737346	0.2005	3.67754	0.000235491	0.00065432	ANO9
344.874	0.737711	0.102267	7.21355	5.45128e-13	4.31027e-12	BTBD19
121.846	0.737893	0.168652	4.37525	1.21295e-05	4.19335e-05	L3MBTL1
975.856	0.738167	0.0649327	11.3682	6.0231e-30	1.40945e-28	GBA2
2550	0.738683	0.229707	3.21576	0.00130099	0.00315568	MT-ATP8
186.462	0.74155	0.131185	5.6527	1.57951e-08	8.1044e-08	TBC1D10A
4655.77	0.742264	0.0355335	20.8891	6.72439e-97	1.29631e-94	PRKAA1
73.9885	0.742317	0.209734	3.53932	0.000401152	0.001071	AL928654.1
720.203	0.744801	0.0825362	9.02393	1.81458e-19	2.40328e-18	CDK10
356.533	0.744869	0.116731	6.38108	1.75838e-10	1.09741e-09	EME2
2875.46	0.746265	0.0501617	14.8772	4.63629e-50	2.25231e-48	GTPBP2
1115.81	0.747256	0.0644162	11.6004	4.09959e-31	1.00789e-29	ABCC10
1935.06	0.747572	0.0645291	11.585	4.90813e-31	1.20423e-29	CITED2
353.848	0.749217	0.103846	7.21466	5.40696e-13	4.2808e-12	DOK3
308.265	0.75099	0.108206	6.94041	3.90973e-12	2.86564e-11	TMEM198B
218.134	0.751893	0.123003	6.1128	9.7899e-10	5.69982e-09	BTG2
3878.81	0.752332	0.0494147	15.2249	2.41825e-52	1.31115e-50	IQGAP3
84.4047	0.752423	0.1894	3.97267	7.10701e-05	0.000216925	ELMO3
53.9896	0.75333	0.243753	3.09055	0.00199787	0.00467246	AC087741.1
2053.84	0.754458	0.0516144	14.6172	2.18224e-48	1.01936e-46	STK40
1075.01	0.755161	0.178353	4.23408	2.29488e-05	7.57784e-05	MAPK8IP3
248.595	0.75599	0.124565	6.06905	1.28671e-09	7.3957e-09	NBPF12
383.989	0.756092	0.0931015	8.12116	4.61733e-16	4.81352e-15	HIC2
1195.36	0.756106	0.0575827	13.1308	2.19379e-39	7.72277e-38	PEX6
135.18	0.756762	0.153626	4.92601	8.3926e-07	3.4883e-06	TMEM106A
174.615	0.756988	0.154601	4.89641	9.76019e-07	4.00871e-06	PTOV1-AS2
51.2741	0.758371	0.240129	3.15818	0.00158756	0.00379322	GPLD1
50.9127	0.758415	0.237937	3.18747	0.00143526	0.00345857	PCSK4
4373.74	0.758702	0.0449647	16.8733	7.07731e-64	5.65487e-62	FILIP1L
1244.91	0.759765	0.0636136	11.9434	7.02498e-33	1.86692e-31	NADSYN1
8015.66	0.761072	0.0864938	8.79916	1.37847e-18	1.72949e-17	VGLL3
551.507	0.761138	0.0818648	9.2975	1.43785e-20	2.08883e-19	CDH8
178.887	0.762873	0.137475	5.54919	2.86994e-08	1.43733e-07	NBR2
516.717	0.763451	0.0814422	9.37414	6.97389e-21	1.03924e-19	ATG4D
283.663	0.763557	0.109951	6.94451	3.79771e-12	2.78859e-11	CLUHP3
1057.33	0.764372	0.0692196	11.0427	2.37757e-28	5.11979e-27	GLTP
847.189	0.765593	0.0702909	10.8918	1.26141e-27	2.601e-26	SOX4
84.3112	0.765617	0.189976	4.03006	5.57621e-05	0.000173515	VILL
1098.11	0.76682	0.0581031	13.1976	9.05863e-40	3.22631e-38	INPP5B
493.723	0.768112	0.102385	7.50216	6.27755e-14	5.39567e-13	MICALL2
211.329	0.768567	0.124543	6.17111	6.78131e-10	3.9864e-09	SLC4A4
73.718	0.770202	0.206589	3.72819	0.000192859	0.00054383	AL135925.1
457.29	0.770393	0.0897894	8.58	9.48733e-18	1.12194e-16	CCDC85A
103.837	0.771251	0.183338	4.20673	2.59095e-05	8.47942e-05	GLI4
89.4476	0.771345	0.184182	4.18796	2.81474e-05	9.16733e-05	ZNF100
90.2922	0.773401	0.185253	4.17483	2.98212e-05	9.67097e-05	NPEPL1
1853.51	0.774567	0.0638188	12.137	6.72637e-34	1.8823e-32	AP1G2
107.289	0.775388	0.173536	4.46816	7.88954e-06	2.81819e-05	KBTBD8
81.3782	0.776928	0.20522	3.78583	0.000153199	0.000440795	C14orf28
5340.56	0.777172	0.0390389	19.9076	3.49499e-88	5.73603e-86	C1orf198
101.325	0.77805	0.171771	4.52959	5.90985e-06	2.15024e-05	RPLP0P6
4540.44	0.778141	0.040074	19.4176	5.48096e-84	7.47936e-82	DDAH1
157.169	0.779386	0.157089	4.96144	6.99741e-07	2.95492e-06	CCDC159
86.1847	0.78084	0.192398	4.05846	4.93983e-05	0.000155224	AC005332.5
2236.53	0.782268	0.0447288	17.4891	1.73337e-68	1.58284e-66	WBP1L
362.62	0.782617	0.10116	7.73643	1.02246e-14	9.53749e-14	SFTA1P
231.364	0.784003	0.117179	6.69066	2.22166e-11	1.52355e-10	HTR7P1
76.379	0.785979	0.196295	4.00407	6.22626e-05	0.000192363	GTF2IP20
54.5376	0.787513	0.227482	3.46187	0.000536429	0.00140046	AC027237.3
1415.76	0.789232	0.118286	6.67225	2.51918e-11	1.71499e-10	TUBGCP6
346.765	0.7905	0.120977	6.53432	6.38973e-11	4.18798e-10	ENGASE
55.3566	0.790941	0.225841	3.50221	0.000461417	0.00121877	CTF1
1462.81	0.791391	0.0592867	13.3485	1.20787e-40	4.47244e-39	ITPRIPL2
69.0562	0.791958	0.214793	3.68708	0.000226845	0.00063247	GTF2IRD2
1615.67	0.792669	0.0500774	15.8289	1.96676e-56	1.2125e-54	CDC25A
62.3726	0.793678	0.213768	3.7128	0.000204976	0.000575326	NFYC-AS1
68.8922	0.796374	0.213632	3.72778	0.000193174	0.000544465	MC1R
1237.24	0.797557	0.0561751	14.1977	9.46522e-46	4.10554e-44	POLR3D
157.291	0.799982	0.139178	5.74792	9.03466e-09	4.75828e-08	SHOC1
254.157	0.803209	0.112001	7.17146	7.42038e-13	5.76956e-12	TMEM254
513.362	0.803942	0.203632	3.94802	7.88019e-05	0.00023825	PILRB
728.277	0.804913	0.0709854	11.3391	8.39602e-30	1.94599e-28	FBXO33
128.179	0.805718	0.154549	5.21335	1.85457e-07	8.43272e-07	ARID3B
615.633	0.805815	0.190109	4.23869	2.24823e-05	7.44202e-05	MZF1
212.064	0.808175	0.13143	6.14911	7.79194e-10	4.57165e-09	PRPF40B
58.866	0.809625	0.230712	3.50925	0.000449375	0.00118851	LIME1
172.216	0.810202	0.138817	5.83647	5.3318e-09	2.86906e-08	MT1F
137.997	0.814818	0.155022	5.25613	1.47115e-07	6.80394e-07	RAD51-AS1
291.371	0.815413	0.11731	6.95095	3.62832e-12	2.67067e-11	HES4
1628.48	0.81634	0.206346	3.95618	7.61582e-05	0.000230832	CHTF18
613.361	0.817784	0.232642	3.51521	0.000439406	0.00116494	MIR503HG
51.6882	0.817787	0.244284	3.34769	0.000814874	0.00205538	WASH5P
69.1487	0.818624	0.207583	3.94359	8.02697e-05	0.000242205	AC027796.4
88.018	0.81864	0.189153	4.32792	1.50526e-05	5.13523e-05	TMEM9B-AS1
56.6684	0.819193	0.237475	3.4496	0.000561408	0.00146047	ASIC3
70.9078	0.819558	0.216834	3.77965	0.000157049	0.000451552	AC145098.2
6457.1	0.821481	0.0450886	18.2193	3.63045e-74	3.80102e-72	HDAC1
79.7624	0.821961	0.193024	4.25833	2.05963e-05	6.85507e-05	SGMS1-AS1
726.123	0.822405	0.0765922	10.7374	6.78963e-27	1.37205e-25	MME
3005.5	0.823287	0.0508191	16.2003	5.01594e-59	3.46129e-57	RGMB
293.19	0.823331	0.106249	7.74909	9.25546e-15	8.68012e-14	ATF3
82.0997	0.823387	0.206846	3.98068	6.87183e-05	0.000210329	GOLGA2P5
545.397	0.824286	0.0914708	9.01147	2.03309e-19	2.68098e-18	CCDC150
238.703	0.826825	0.117912	7.01221	2.34587e-12	1.74682e-11	NBPF11
331.873	0.827124	0.103341	8.0038	1.20639e-15	1.21088e-14	XKR8
718.64	0.828731	0.0697258	11.8856	1.40684e-32	3.69827e-31	AGK
575.405	0.828732	0.079476	10.4274	1.85818e-25	3.53171e-24	DNAJB9
259.666	0.829226	0.115238	7.19574	6.21216e-13	4.87697e-12	SFXN2
72.4101	0.831933	0.208269	3.99452	6.48258e-05	0.000199389	BBC3
5565.52	0.832163	0.042996	19.3544	1.87051e-83	2.49523e-81	PSAT1
58.9737	0.832288	0.221816	3.75216	0.00017532	0.000499008	LINC01475
59.5055	0.833624	0.227409	3.66575	0.000246613	0.000682726	AC005674.1
114.169	0.835725	0.162574	5.14058	2.73888e-07	1.21756e-06	SCAMP1-AS1
1186.59	0.836095	0.0742881	11.2548	2.19413e-29	4.99957e-28	GOLGA8B
252.247	0.836294	0.113423	7.37322	1.66556e-13	1.37983e-12	E2F5
607.557	0.837486	0.0819488	10.2196	1.61962e-24	2.91844e-23	KIAA0895L
1324.34	0.838406	0.0566022	14.8122	1.22089e-49	5.86075e-48	FAM222B
93.3141	0.838854	0.178125	4.70934	2.48517e-06	9.59085e-06	MIR1915HG
177.496	0.839931	0.134422	6.24845	4.14544e-10	2.49858e-09	CBSL
1686.93	0.840004	0.049008	17.1401	7.44588e-66	6.4593e-64	TMEM170A
298.108	0.840406	0.106156	7.91671	2.43868e-15	2.38853e-14	FICD
182.088	0.841037	0.134277	6.26345	3.76549e-10	2.27748e-09	LONRF1
274.691	0.84211	0.359304	2.34372	0.0190924	0.035911	EIF4A1
2627.08	0.842371	0.0468789	17.9691	3.40353e-72	3.44466e-70	ARHGEF2
58.5844	0.846697	0.221887	3.81589	0.000135693	0.000394727	AL117339.4
1086.79	0.85188	0.0598717	14.2284	6.10463e-46	2.66693e-44	LZTS3
140.331	0.853924	0.164711	5.18437	2.16747e-07	9.77859e-07	PAQR6
1927.96	0.854821	0.137371	6.22271	4.88653e-10	2.92206e-09	CYTH2
992.461	0.855274	0.0684599	12.4931	8.145e-36	2.45462e-34	NRXN3
113.082	0.857606	0.166304	5.15686	2.5113e-07	1.12255e-06	KCTD16
747.204	0.85858	0.0707909	12.1284	7.4692e-34	2.08537e-32	RNF44
361.708	0.861335	0.0998237	8.62856	6.21293e-18	7.43409e-17	ZNF783
628.647	0.86491	0.0869122	9.95154	2.48314e-23	4.18277e-22	H2BC12
147.244	0.867661	0.163852	5.29538	1.1877e-07	5.57152e-07	BRICD5
65.1263	0.868526	0.213983	4.05885	4.93146e-05	0.000155001	GCNA
78.2942	0.870585	0.195887	4.44433	8.81665e-06	3.1282e-05	PDXDC2P-NPIPB14P
136.963	0.870627	0.16158	5.38821	7.11648e-08	3.40542e-07	TRIM17
116.931	0.870669	0.173196	5.02707	4.98037e-07	2.13885e-06	AC015909.1
105.997	0.870692	0.173394	5.02147	5.12762e-07	2.19665e-06	PDLIM3
590.286	0.872272	0.0802611	10.8679	1.63869e-27	3.35614e-26	PCK2
3150.51	0.874407	0.0497276	17.5839	3.27126e-69	3.0798e-67	KHNYN
63.6213	0.88107	0.212624	4.1438	3.41601e-05	0.00010993	TMEM17
1339.44	0.882308	0.0583769	15.114	1.30981e-51	6.85675e-50	BLZF1
259.563	0.882799	0.134344	6.5712	4.99113e-11	3.31604e-10	TTLL3
478.162	0.885022	0.0868954	10.1849	2.31569e-24	4.14198e-23	LINC01278
95.0491	0.887431	0.177407	5.00224	5.66673e-07	2.41482e-06	RAI2
260.624	0.887503	0.11255	7.88542	3.13484e-15	3.04337e-14	MAP1LC3A
836.803	0.890955	0.0663958	13.4188	4.68937e-41	1.75779e-39	B3GALT6
213.317	0.894926	0.125143	7.15123	8.60019e-13	6.65282e-12	MTG1
483.613	0.900114	0.223076	4.03501	5.45997e-05	0.000170204	ACCS
5606.68	0.903385	0.0482693	18.7155	3.69998e-78	4.32079e-76	MTHFD2
115.778	0.903571	0.167895	5.38177	7.37564e-08	3.52527e-07	LINC01089
1819.03	0.907699	0.0557921	16.2693	1.62928e-59	1.15044e-57	LRRC7
130.84	0.910807	0.160737	5.66643	1.458e-08	7.50952e-08	ARHGEF5
192.218	0.911888	0.131885	6.91428	4.70244e-12	3.41573e-11	LINC00265
238.649	0.920993	0.13004	7.08236	1.41719e-12	1.07573e-11	CDK5RAP3
67.0689	0.921359	0.224213	4.1093	3.96863e-05	0.000126529	JMJD7-PLA2G4B
516.381	0.921589	0.082915	11.1149	1.06204e-28	2.33668e-27	TMEM243
1907.57	0.923223	0.0491981	18.7654	1.44861e-78	1.72484e-76	ATP6V1D
147.751	0.92487	0.148069	6.2462	4.20555e-10	2.53355e-09	DUSP8
119.97	0.928492	0.173568	5.34944	8.82251e-08	4.18553e-07	FAM198B-AS1
1571.06	0.930246	0.0537822	17.2965	4.99599e-67	4.39683e-65	CDKN1A
83.1121	0.930523	0.195329	4.76388	1.89908e-06	7.469e-06	RTEL1-TNFRSF6B
101.711	0.932484	0.175054	5.32684	9.99353e-08	4.72263e-07	IDUA
5040.67	0.934543	0.0351002	26.625	3.48979e-156	1.84276e-153	OLR1
126.983	0.934714	0.157975	5.91686	3.2814e-09	1.80247e-08	WBP1
307.213	0.935387	0.113627	8.23206	1.84017e-16	1.97254e-15	A2M
145.94	0.936144	0.15744	5.94603	2.74718e-09	1.51933e-08	RSKR
4220.58	0.943667	0.0476481	19.8049	2.69922e-87	4.31342e-85	HSPB1
61.5775	0.949812	0.224582	4.22924	2.34484e-05	7.72361e-05	MRM1
82.4416	0.95193	0.191869	4.96137	6.99992e-07	2.95495e-06	GOLGA8A
369.267	0.952003	0.112753	8.44325	3.08629e-17	3.50965e-16	NSUN5P1
3708.27	0.957169	0.0529212	18.0867	4.05827e-73	4.17692e-71	SLC7A5
4862.9	0.958053	0.0460608	20.7997	4.35359e-96	8.01126e-94	YBX3
848.903	0.958732	0.0741756	12.9252	3.2463e-38	1.09518e-36	SLC1A4
74.0041	0.9595	0.202109	4.74744	2.06003e-06	8.05507e-06	PDE6B
170.007	0.96173	0.136631	7.03887	1.938e-12	1.4529e-11	RNF216P1
724.143	0.962898	0.0702752	13.7018	9.90001e-43	3.94215e-41	ZDHHC12
291.959	0.963656	0.106082	9.08408	1.04581e-19	1.41283e-18	AC007743.1
1831.27	0.964723	0.0493789	19.5372	5.30453e-85	7.49111e-83	HBEGF
1302.09	0.965512	0.182762	5.2829	1.27157e-07	5.93514e-07	IGFBP5
744.744	0.968419	0.0768501	12.6014	2.07401e-36	6.45869e-35	PLEKHG4
1038.95	0.969942	0.0651721	14.8828	4.26394e-50	2.07974e-48	INTS14
56.0271	0.969987	0.243256	3.98752	6.67686e-05	0.000205033	LYPLAL1-DT
53.158	0.97099	0.244099	3.97786	6.95389e-05	0.00021268	ERBB4
51.7437	0.982503	0.234674	4.18667	2.83082e-05	9.21478e-05	PROCA1
1444.63	0.988312	0.19591	5.04472	4.54196e-07	1.96516e-06	AHSA2P
131.714	0.999314	0.159897	6.24973	4.1115e-10	2.47935e-09	NEK8
85.1013	1.00421	0.194261	5.16938	2.34873e-07	1.05454e-06	PLEKHH1
455.702	1.00454	0.090132	11.1452	7.55344e-29	1.66794e-27	MARCHF1
64.5501	1.00613	0.226332	4.44537	8.77412e-06	3.11402e-05	LINC00894
239.178	1.00895	0.122237	8.25404	1.53133e-16	1.64876e-15	SESN2
51.289	1.01269	0.242781	4.17118	3.0302e-05	9.81644e-05	NPIPB15
369.344	1.01738	0.100494	10.1239	4.32994e-24	7.65459e-23	EGR1
634.481	1.02071	0.0875012	11.6651	1.92288e-31	4.80522e-30	FADS3
268.653	1.02643	0.114618	8.95524	3.39004e-19	4.41286e-18	CD274
1187.72	1.03116	0.0647179	15.9332	3.72914e-57	2.3837e-55	MAN2A2
325.526	1.03166	0.103077	10.0086	1.39762e-23	2.39409e-22	ANKRD20A5P
273.543	1.03897	0.110847	9.37297	7.05206e-21	1.0496e-19	TLL1
53.4939	1.0423	0.233912	4.45594	8.35275e-06	2.96881e-05	CRNDE
107.637	1.04306	0.191455	5.44806	5.09233e-08	2.4818e-07	PGM5P2
1769.26	1.04444	0.0486151	21.4839	2.2022e-102	4.77601e-100	STK3
473.77	1.05272	0.0972957	10.8198	2.77475e-27	5.65426e-26	SCN9A
270.418	1.06494	0.120574	8.83225	1.02592e-18	1.2979e-17	ALDH1L2
663.302	1.06573	0.0934564	11.4036	4.01403e-30	9.52156e-29	PABPC1L
381.641	1.07497	0.282718	3.80225	0.000143386	0.000414575	MAMDC4
327.473	1.07537	0.104642	10.2767	8.97434e-25	1.63654e-23	PLAGL1
749.964	1.07607	0.0718796	14.9704	1.14593e-50	5.7748e-49	NUTM2A-AS1
90.2266	1.07804	0.192629	5.59647	2.18759e-08	1.11164e-07	PLXNC1
984.576	1.08117	0.0680034	15.8987	6.46949e-57	4.09229e-55	DPH2
136.903	1.08236	0.163076	6.63716	3.19781e-11	2.15404e-10	BDH1
95.207	1.08337	0.190297	5.69307	1.24774e-08	6.47323e-08	CCNE1
369.814	1.08352	0.10757	10.0727	7.29178e-24	1.27606e-22	HCN4
86.4453	1.09612	0.188931	5.80168	6.56531e-09	3.49871e-08	IGF2BP3
227.599	1.10012	0.257734	4.26844	1.96848e-05	6.5842e-05	AMH
325.623	1.10495	0.106485	10.3766	3.16833e-25	5.92903e-24	AC135050.6
54.3353	1.10598	0.231927	4.76865	1.85468e-06	7.30858e-06	CNTN5
117.883	1.11094	0.174824	6.35461	2.08954e-10	1.29477e-09	AC092807.3
937.692	1.12077	0.0709871	15.7884	3.74061e-56	2.29443e-54	IL7R
1042.61	1.13253	0.0604446	18.7367	2.48775e-78	2.93337e-76	TP53INP2
5193.85	1.13914	0.0382506	29.7809	6.91105e-195	4.93733e-192	SRPRA
662.7	1.14218	0.078436	14.562	4.9015e-48	2.28079e-46	SCML2
435.024	1.14543	0.091619	12.5021	7.27086e-36	2.20762e-34	FBXO8
97.3443	1.15141	0.191438	6.01454	1.80396e-09	1.02093e-08	MYO15B
89.4804	1.15308	0.193596	5.95613	2.5828e-09	1.4343e-08	AL136169.1
457.261	1.16342	0.214406	5.42627	5.75445e-08	2.78882e-07	LINC02593
1199.43	1.16369	0.124345	9.3586	8.08037e-21	1.19387e-19	PAPPA
852.714	1.18412	0.067441	17.5578	5.18486e-69	4.80688e-67	ARID3A
70.4906	1.18882	0.223799	5.31202	1.08419e-07	5.09578e-07	C4BPB
462.729	1.19168	0.0883768	13.4841	1.9406e-41	7.36519e-40	CCNJ
51.0126	1.19263	0.242008	4.92805	8.30532e-07	3.45794e-06	RASGRP3
534.366	1.19714	0.0892789	13.409	5.3587e-41	2.0025e-39	FJX1
241.209	1.20017	0.131977	9.09383	9.56102e-20	1.29597e-18	STAG3L5P
241.052	1.20472	0.122736	9.81553	9.65305e-23	1.58427e-21	AC074117.1
953.248	1.20903	0.0681088	17.7515	1.67846e-70	1.63079e-68	CELF2
145.342	1.21302	0.152712	7.94322	1.97007e-15	1.94209e-14	ZBED3
635.412	1.22875	0.0800138	15.3567	3.19392e-53	1.77124e-51	TLNRD1
139.239	1.23795	0.153722	8.05313	8.0702e-16	8.24327e-15	DHRS11
75.1048	1.23804	0.218534	5.66519	1.4686e-08	7.56091e-08	AC087501.4
1214.54	1.25912	0.123856	10.166	2.81325e-24	5.02454e-23	SERPINB9
703.527	1.27109	0.0751185	16.9211	3.14342e-64	2.54512e-62	JDP2
262.001	1.28961	0.117889	10.9392	7.48658e-28	1.55693e-26	DYRK1B
59.8108	1.29122	0.227634	5.67236	1.40843e-08	7.25726e-08	IQCN
52.9082	1.29698	0.245111	5.29141	1.21374e-07	5.68486e-07	AL354740.1
90.3097	1.30413	0.191302	6.81712	9.28837e-12	6.61626e-11	GSG1
99.8546	1.33548	0.190204	7.02132	2.19789e-12	1.64065e-11	AC010422.8
133.09	1.35522	0.158229	8.56494	1.08135e-17	1.27012e-16	FUT4
175.31	1.37232	0.293458	4.67636	2.92005e-06	1.11312e-05	YJEFN3
140.066	1.3756	0.157798	8.71748	2.8447e-18	3.5004e-17	CNN1
178.355	1.38566	0.137771	10.0577	8.49573e-24	1.47191e-22	CBS
2906.53	1.3987	0.0471496	29.6651	2.16494e-193	1.46073e-190	TRIM58
473.454	1.40326	0.097814	14.3462	1.12509e-46	5.04213e-45	CREB5
101.692	1.42171	0.18588	7.64857	2.0322e-14	1.83776e-13	FBXO27
1060.77	1.43236	0.0620769	23.074	8.44487e-118	2.50153e-115	FAM234B
1989.28	1.43739	0.119023	12.0765	1.40604e-33	3.87218e-32	TGFB2
118.133	1.45588	0.170747	8.5265	1.50837e-17	1.74968e-16	CDH5
232.256	1.49995	0.125474	11.9543	6.16593e-33	1.64222e-31	DCDC2
907.119	1.50642	0.0727186	20.7157	2.49961e-95	4.53101e-93	ANKRD1
2930.82	1.57698	0.0469778	33.5687	4.80367e-247	6.48229e-244	PM20D2
190.536	1.60783	0.146232	10.9951	4.03488e-28	8.56707e-27	ADM2
53.9335	1.62168	0.253156	6.40586	1.49525e-10	9.40922e-10	VMAC
687.412	1.72813	0.080937	21.3515	3.77477e-101	7.90423e-99	MICB
74.4309	2.25408	0.261109	8.63272	5.99125e-18	7.1972e-17	CHAC1
427.661	2.47647	0.105048	23.5748	6.99368e-123	2.23522e-120	LMLN
56.0076	2.89049	0.296102	9.76181	1.64202e-22	2.67682e-21	MPZL3

## Sheet: Table S5
Table S5. Gene-ontology (GO) enrichment analysis of DE genes in 12Z cells following LINC01133 knockdown.
Enrichment FDR	Genes in list	Total genes	Functional Category	Genes
1.39837363075526e-05	279	3903	Regulation of cell communication	HMOX1 APOL3 SLC20A1 CXXC5 C18ORF32 CACNG4 SESN1 ARHGAP28 IRAK3 TGFB2 NDRG4 SFRP1 BBC3 MAP2K6 DUSP22 IGFBP5 TNFAIP3 TGFB3 NAPB BMP2 KDR BCL2L2 SESN2 PRKAA1 SPART IL6ST PDGFRA SPRY2 PAK6 MAPK8IP3 TLE3 NTRK3 IGFBP3 GDF6 DHRS3 INHBB OTUD4 GPRC5B RSPO1 CD14 CDH2 PDGFD CALB2 RCAN2 EPS8L2 GPR4 GRIN2A SBK2 PALM3 SULF2 SLC39A10 LIME1 HIP1 FZD7 BTRC LTBP1 ARHGEF5 SNCAIP MET ENG CXCL12 CDK5RAP3 TPD52L1 FAM1…
1.39837363075526e-05	130	1506	Cell migration	SEMA3F FSCN1 CXCL2 PLAT MET CXCL12 TNFAIP3 PGF PIK3CA CXCL6 KDR ITGB4 NAV1 PLXNC1 PAK6 DCDC2 CXCL5 CXCL1 CXCL8 SEMA3E PDGFD RND1 SBK2 MYLK TGFB2 NDRG4 CTSH CEMIP SFRP1 ENG VSIR IGFBP5 PLAU MGAT3 APOE PDGFRA KLF4 ENPP2 CCN3 FGF7 NTRK3 IGFBP3 FGF18 STC1 VCAM1 BMPER HOXB9 PODN ERBB4 ADGRG1 PDCD6 CELSR3 CD9 FUT8 ARHGEF5 TIE1 EFNB1 NRP1 BDKRB1 CORO1A ELMO3 SMPD3 RIPOR2 HBEGF SELENOK ACVR1 IL1R1 ARHGEF…
1.39837363075526e-05	280	3952	Regulation of signaling	HMOX1 APOL3 SLC20A1 CXXC5 C18ORF32 CACNG4 SESN1 ARHGAP28 IRAK3 TGFB2 NDRG4 SFRP1 BBC3 MAP2K6 DUSP22 IGFBP5 TNFAIP3 TGFB3 NAPB BMP2 KDR BCL2L2 SESN2 PRKAA1 SPART IL6ST PDGFRA SPRY2 PAK6 MAPK8IP3 TLE3 NTRK3 IGFBP3 GDF6 DHRS3 INHBB OTUD4 GPRC5B RSPO1 CD14 CDH2 PDGFD CALB2 RCAN2 EPS8L2 GPR4 GRIN2A SBK2 PALM3 SULF2 SLC39A10 LIME1 HIP1 FZD7 BTRC LTBP1 ARHGEF5 SNCAIP MET ENG CXCL12 CDK5RAP3 TPD52L1 FAM1…
1.39837363075526e-05	124	1433	Positive regulation of developmental process	LRRC7 TIE1 PGF KDR PLXNC1 NTRK3 JCAD GPRC5B MIEF2 HIPK2 SYT1 TGFB2 HMOX1 SFRP1 SOD2 ACVR1 ARHGEF2 CD46 TGFB3 BMP2 ADM2 APOE SERPINE2 FGF7 IGFBP3 DAB2 WNT4 ATOH8 CXCL8 CEBPB PLD6 PDCD6 YBX3 CDON TNFRSF1A IRAK3 NRP1 ATP11C MEDAG HSF4 CTSH STK3 SCN1B ENG CXCL12 DLX2 HDAC1 RGS2 TNFAIP3 SERP1 ATF1 C3 RAMP2 PRKAA1 EPHB2 WNT2B IL6ST P2RX4 PLAA MAPK8IP3 CBLN2 CRABP2 BOC STAR CRB2 ANKRD1 TENM4 DDAH1 PPARG…
1.39837363075526e-05	73	694	Cellular response to growth factor stimulus	TGFB2 DUSP22 ACVR1 PGF TGFB3 BMP2 SPART SPRY2 NTRK3 GDF6 HAP1 RGMB SULF2 LTBP1 TGFBR3 SFRP1 ENG KDR PDGFRA KLF4 ANKRD1 ZFP36L2 DAB2 FGF18 NBL1 CDH5 CCBE1 TRIM33 PDCD6 GCLM FUT8 HIPK2 NEO1 NRP1 CORO1A SMPD3 SNX25 NRP2 EGR1 GIPC1 ID1 RAMP2 LRP4 FGF7 CCNA2 SRD5A1 STAR CRB2 WNT4 VCAM1 CITED2 BMPER HTRA1 CTNNB1 HTRA3 PDGFD CHST11 FZD4 ERBB4 CXCL8 GAS1 APLN DOK5 HSPB1 CDKN2B JCAD CEP57 MAGI2 ANOS1 UBE2…
1.88228442563411e-05	74	723	Response to growth factor	TGFB2 MXRA5 DUSP22 ACVR1 PGF TGFB3 BMP2 SPART SPRY2 NTRK3 GDF6 HAP1 RGMB SULF2 LTBP1 TGFBR3 SFRP1 ENG KDR PDGFRA KLF4 ANKRD1 ZFP36L2 DAB2 FGF18 NBL1 CDH5 CCBE1 TRIM33 PDCD6 GCLM FUT8 HIPK2 NEO1 NRP1 CORO1A SMPD3 SNX25 NRP2 EGR1 GIPC1 ID1 RAMP2 LRP4 FGF7 CCNA2 SRD5A1 STAR CRB2 WNT4 VCAM1 CITED2 BMPER HTRA1 CTNNB1 HTRA3 PDGFD CHST11 FZD4 ERBB4 CXCL8 GAS1 APLN DOK5 HSPB1 CDKN2B JCAD CEP57 MAGI2 ANOS…
2.40354833559165e-05	98	1072	Enzyme linked receptor protein signaling pathway	TIE1 EFNB1 TGFB2 PLAT MET DUSP22 HBEGF ACVR1 IGFBP5 PGF TGFB3 BMP2 KDR SPART EPHB2 PDGFRA SPRY2 NTRK3 EPHA5 IGFBP3 FOXO1 GDF6 NRG1 INHBB NPR1 PDGFD HAP1 RGMB ERBB4 SULF2 LTBP1 HIPK2 TGFBR3 NDRG4 ENG GPLD1 LIFR IL6ST FAM83A DAB2 NBL1 BMPER ATOH8 AFAP1L2 CDH5 CCBE1 TRIM33 PDCD6 FUT8 NEO1 NRP1 DOK5 SMPD3 SFRP1 SNX25 NRP2 EGR1 GIPC1 ID1 PRKAA1 LRP4 CCN3 FGF7 NCEH1 CRB2 CTF1 FGF18 SH2B2 WNT4 ADORA1 PR…
2.40354833559165e-05	85	883	Regulation of cell migration	SEMA3F CXCL12 PGF PLXNC1 SEMA3E PDGFD RND1 MYLK TGFB2 NDRG4 CTSH CEMIP SFRP1 ENG VSIR IGFBP5 PLAU KDR MGAT3 APOE PDGFRA KLF4 ENPP2 FGF7 NTRK3 IGFBP3 FGF18 STC1 BMPER PODN PDCD6 CD9 TIE1 NRP1 BDKRB1 CORO1A SMPD3 RIPOR2 HBEGF SELENOK IL1R1 ARHGEF2 CD274 BMP2 P2RX4 PLAA MAPK8IP3 IGSF10 NRG1 NBL1 WNT4 ADORA1 ITGA2 MAPRE2 ANO6 ERBB4 PLCB1 SLC8A1 CCBE1 SPN ADGRG1 HMOX1 ACVR1 CDH1 ZNF268 MET HSPB1 SOD2 …
4.41519127520074e-05	121	1432	Cellular response to endogenous stimulus	SESN1 TGFB2 PCK2 DUSP22 ACVR1 TGFB3 NCOA3 BMP2 THRA SESN2 RAMP2 RAMP1 LPIN3 SPART SPRY2 NTRK3 FOXO1 GDF6 RGMB WT1 GNG2 SULF2 CDH1 LTBP1 TGFBR3 SFRP1 ENG GPLD1 FOXP1 IGFBP5 HDAC1 ARHGEF2 KLF9 P2RX4 HCN4 ANKRD1 ZFP36L2 DAB2 PPARGC1B FGF18 NBL1 UBR1 PRKCD CTNNB1 CDH5 TRIM33 AQP1 P2RY11 CFTR GCLM FUT8 HIPK2 NEO1 COL16A1 CORO1A SMPD3 NAMPT SNX25 HMGCS1 PGF EGR1 GIPC1 ID1 KLF2 PRKAA1 LRP4 PDGFRA KLF4 F…
5.20637080345331e-05	152	1921	Locomotion	SEMA3F FSCN1 CXCL2 IGSF9 EFNB1 PLAT MET CXCL12 TNFAIP3 PGF PIK3CA CXCL6 KDR ITGB4 EPHB2 NAV1 PLXNC1 PAK6 EPHA5 DCDC2 CXCL5 CXCL1 CXCL8 SEMA3E PDGFD RND1 SBK2 MYLK TGFB2 CORO1A NDRG4 CTSH CEMIP SFRP1 ENG VSIR IGFBP5 PLAU MGAT3 APOE PDGFRA KLF4 ENPP2 CCN3 FGF7 NTRK3 IGFBP3 FGF18 STC1 VCAM1 BMPER HOXB9 PODN ERBB4 ADGRG1 PDCD6 CELSR3 CD9 ANOS1 FUT8 ARHGEF5 TIE1 NEO1 NRP1 BDKRB1 ELMO3 SMPD3 SCN1B RIPO…
6.10251581412818e-05	158	2027	Regulation of intracellular signal transduction	HMOX1 APOL3 SLC20A1 CXXC5 C18ORF32 SESN1 ARHGAP28 IRAK3 TGFB2 NDRG4 MAP2K6 DUSP22 TGFB3 BMP2 KDR BCL2L2 SESN2 PRKAA1 IL6ST PDGFRA SPRY2 PAK6 MAPK8IP3 NTRK3 GDF6 INHBB GPRC5B CD14 PDGFD RCAN2 EPS8L2 GPR4 SBK2 LIME1 HIP1 FZD7 ARHGEF5 MET CXCL12 CDK5RAP3 TPD52L1 TNFAIP3 APOE P2RX4 ARRB1 ANKRD1 CTF1 FOXO1 FGF18 BMT2 BMPER FBP1 IL7R TLR6 PLCB1 MAGI2 S100A4 PDCD6 CDON NGEF NRP1 DOK5 SFRP1 STK3 CYTH2 HS…
6.10251581412818e-05	93	1028	Regulation of cellular component movement	SEMA3F CXCL12 PGF PLXNC1 SEMA3E PDGFD RND1 CD9 MYLK TGFBR3 TGFB2 NDRG4 CTSH CEMIP SFRP1 ENG VSIR IGFBP5 PLAU KDR MGAT3 APOE PDGFRA KLF4 ENPP2 FGF7 NTRK3 IGFBP3 FGF18 STC1 BMPER PODN PDCD6 TIE1 NRP1 BDKRB1 CORO1A SMPD3 RIPOR2 HBEGF SELENOK IL1R1 ARHGEF2 SSX2IP CD274 BMP2 P2RX4 PLAA MAPK8IP3 IGSF10 NRG1 NBL1 WNT4 TRIM58 ADORA1 ITGA2 MAPRE2 HAP1 ANO6 ERBB4 PLCB1 SLC8A1 CCBE1 SPN ADGRG1 HMOX1 ACVR1 C…
6.28506293747439e-05	41	328	Regulation of vasculature development	TIE1 PGF KDR JCAD HIPK2 TGFB2 HMOX1 SOD2 ADM2 KLF4 CXCL8 PDCD6 NRP1 CTSH ENG C3 ID1 RAMP2 ENPP2 DDAH1 CTNNB1 SEMA3E PDGFD GPR4 CCBE1 FGF18 BMPER CDH5 HSPB1 PTGIS KLF2 SPRY2 HK2 WNT4 AQP1 SFRP1 EGR1 HMGA2 WT1 TNFAIP3 NPR1
6.28506293747439e-05	87	946	Regulation of cell motility	SEMA3F CXCL12 PGF PLXNC1 SEMA3E PDGFD RND1 MYLK TGFB2 NDRG4 CTSH CEMIP SFRP1 ENG VSIR IGFBP5 PLAU KDR MGAT3 APOE PDGFRA KLF4 ENPP2 FGF7 NTRK3 IGFBP3 FGF18 STC1 BMPER PODN PDCD6 CD9 TIE1 NRP1 BDKRB1 CORO1A SMPD3 RIPOR2 HBEGF SELENOK IL1R1 ARHGEF2 SSX2IP CD274 BMP2 P2RX4 PLAA MAPK8IP3 IGSF10 NRG1 NBL1 WNT4 ADORA1 ITGA2 MAPRE2 ANO6 ERBB4 PLCB1 SLC8A1 CCBE1 SPN ADGRG1 HMOX1 ACVR1 CDH1 ZNF268 MET HSPB…
6.28506293747439e-05	137	1704	Response to endogenous stimulus	SESN1 TGFB2 PCK2 MXRA5 DUSP22 ACVR1 TGFB3 NCOA3 BMP2 THRA SESN2 RAMP2 RAMP1 LPIN3 SPART SPRY2 NTRK3 FOXO1 GDF6 PAQR8 RGMB PAQR7 WT1 GNG2 SULF2 CDH1 LTBP1 TGFBR3 SFRP1 ENG GPLD1 FOXP1 IGFBP5 HDAC1 ARHGEF2 KLF9 APOE P2RX4 HCN4 ANKRD1 ZFP36L2 DAB2 PPARGC1B FGF18 NBL1 UBR1 PRKCD CTNNB1 CDH5 TRIM33 AQP1 P2RY11 CFTR CD38 CD9 GCLM FUT8 HIPK2 NEO1 COL16A1 MTAP CORO1A MMP15 SMPD3 NAMPT CA9 CXCL12 SNX25 HM…
6.28506293747439e-05	240	3382	Regulation of multicellular organismal process	SEMA3F LRRC7 TIE1 IRAK3 DMPK SCN1B PGF TNFRSF8 PLAU ID1 KDR APOE PLXNC1 NTRK3 JCAD GPRC5B SEMA3E CD14 CDH2 ID4 HES4 GTF2IRD2 SULF2 HDAC1 SERPINE2 IGF2BP3 SLC8A1 CD9 LTBP1 HIPK2 SYT1 TGFB2 HMOX1 SFRP1 CDK6 VSIR SOD2 FOXP1 ACVR1 IL1R1 IL18R1 ARHGEF2 CD46 TGFB3 CD274 C3 BMP2 ADM2 PDGFRA KLF4 HLA-F ARRB1 FGF7 SPOCK1 DAB2 FGF18 STC1 WNT4 INHBB BMPER POLR3D ATOH8 AFAP1L2 CXCL8 CEBPB C1QTNF1 ZFPM1 CCBE1…
6.28899644754948e-05	248	3529	Regulation of signal transduction	HMOX1 APOL3 SLC20A1 CXXC5 C18ORF32 CACNG4 SESN1 ARHGAP28 IRAK3 TGFB2 NDRG4 SFRP1 BBC3 MAP2K6 DUSP22 IGFBP5 TNFAIP3 TGFB3 BMP2 KDR BCL2L2 SESN2 PRKAA1 SPART IL6ST PDGFRA SPRY2 PAK6 MAPK8IP3 TLE3 NTRK3 IGFBP3 GDF6 DHRS3 INHBB OTUD4 GPRC5B RSPO1 CD14 PDGFD RCAN2 EPS8L2 GPR4 SBK2 PALM3 SULF2 SLC39A10 LIME1 HIP1 FZD7 BTRC LTBP1 ARHGEF5 MET ENG CXCL12 CDK5RAP3 TPD52L1 FAM162A FOXP1 ACVR1 HDAC1 CD46 TNF…
6.28899644754948e-05	213	2938	Cellular response to organic substance	SESN1 CXCL2 IRAK3 TGFB2 PCK2 CXCL12 MAPK10 DUSP22 ACVR1 PGF TGFB3 CD274 SERP1 NCOA3 CXCL6 BMP2 THRA SESN2 RAMP2 RAMP1 LPIN3 SPART IRAK2 SPRY2 PARP16 NTRK3 FOXO1 GDF6 SH2B2 CXCL5 CXCL1 OTUD4 CXCL8 CD14 HAP1 RGMB WT1 IFITM1 GNG2 PALM3 SULF2 FP565260.3 CFTR CDH1 LTBP1 CALCRL TGFBR3 SFRP1 ENG RIPOR2 GPLD1 LIFR FOXP1 IGFBP5 IL1R1 IL18R1 HDAC1 ARHGEF2 TNFAIP3 KLF9 EGR1 ADCY7 KDR IL6ST PDGFRA P2RX4 KLF4…
7.50217970617413e-05	134	1670	Cell motility	SEMA3F FSCN1 CXCL2 PLAT MET CXCL12 TNFAIP3 PGF PIK3CA CXCL6 KDR ITGB4 NAV1 PLXNC1 PAK6 DCDC2 CXCL5 CXCL1 CXCL8 SEMA3E PDGFD RND1 SBK2 MYLK TGFB2 NDRG4 CTSH CEMIP SFRP1 ENG VSIR IGFBP5 PLAU MGAT3 APOE PDGFRA KLF4 ENPP2 CCN3 FGF7 NTRK3 IGFBP3 FGF18 STC1 VCAM1 BMPER HOXB9 PODN ERBB4 ADGRG1 PDCD6 CELSR3 CD9 FUT8 ARHGEF5 TIE1 EFNB1 NRP1 BDKRB1 CORO1A ELMO3 SMPD3 RIPOR2 HBEGF SELENOK ACVR1 IL1R1 ARHGEF…
7.50217970617413e-05	134	1670	Localization of cell	SEMA3F FSCN1 CXCL2 PLAT MET CXCL12 TNFAIP3 PGF PIK3CA CXCL6 KDR ITGB4 NAV1 PLXNC1 PAK6 DCDC2 CXCL5 CXCL1 CXCL8 SEMA3E PDGFD RND1 SBK2 MYLK TGFB2 NDRG4 CTSH CEMIP SFRP1 ENG VSIR IGFBP5 PLAU MGAT3 APOE PDGFRA KLF4 ENPP2 CCN3 FGF7 NTRK3 IGFBP3 FGF18 STC1 VCAM1 BMPER HOXB9 PODN ERBB4 ADGRG1 PDCD6 CELSR3 CD9 FUT8 ARHGEF5 TIE1 EFNB1 NRP1 BDKRB1 CORO1A ELMO3 SMPD3 RIPOR2 HBEGF SELENOK ACVR1 IL1R1 ARHGEF…
9.89915656476003e-05	28	186	Positive regulation of vasculature development	TIE1 PGF KDR JCAD HIPK2 HMOX1 SOD2 ADM2 CXCL8 PDCD6 NRP1 CTSH ENG C3 RAMP2 DDAH1 PDGFD CCBE1 KLF4 FGF18 BMPER CDH5 HSPB1 PTGIS HK2 AQP1 EGR1 HMGA2
0.000125085448493509	55	521	Positive regulation of cell migration	SEMA3F CXCL12 PGF SEMA3E PDGFD MYLK TGFB2 CTSH CEMIP VSIR PLAU KDR PDGFRA FGF7 NTRK3 FGF18 PDCD6 NRP1 BDKRB1 CORO1A RIPOR2 HBEGF SELENOK IL1R1 ARHGEF2 CD274 BMP2 P2RX4 PLAA MAPK8IP3 ITGA2 MAPRE2 ANO6 SLC8A1 CCBE1 HMOX1 ACVR1 IGFBP5 ENPP2 ZNF268 MET HSPB1 SOD2 GPLD1 FOXP1 DOCK4 SPRY2 DAB2 PLPP3 JCAD ATOH8 AGER SPN NRP2 CXCL8
0.000125085448493509	93	1062	Tube development	CALCRL TIE1 PGF THRA KDR RAMP2 RAMP1 JCAD LUZP1 CDH2 CTNNB1 HIPK2 TGFB2 HMOX1 ADM2 KLF4 CCN3 FGF7 BMPER CXCL8 ADGRG1 PDCD6 NRXN3 CUL7 NOTCH3 TIGAR NRP1 SMPD3 CRISPLD2 CTSH SFRP1 STK3 ENG ACVR1 IGFBP5 NRP2 TGFB3 PIK3CA CDKN1A SOX4 C3 BMP2 ID1 KLF2 APOE EPHB2 WNT2B PDGFRA SERPINE2 SPRY2 ENPP2 MAPK8IP3 PRKACB DDAH1 FGF18 SSBP3 WNT4 CITED2 BTRC DCHS1 SEMA3E APLN CSPG4 FZD4 GPR4 AQP11 CCBE1 PTCH1 STK4…
0.000125085448493509	246	3536	Cellular response to chemical stimulus	SYT1 SESN1 CXCL2 IRAK3 TGFB2 PCK2 CXCL12 MAPK10 DUSP22 ACVR1 PGF TGFB3 CD274 SERP1 NCOA3 CXCL6 BMP2 THRA SESN2 RAMP2 RAMP1 SYT11 LPIN3 SPART IRAK2 SPRY2 PARP16 NTRK3 FOXO1 GDF6 SH2B2 CXCL5 CXCL1 OTUD4 CYP2S1 CXCL8 CD14 HAP1 CCS RGMB WT1 IFITM1 GNG2 PALM3 SULF2 MT1F FP565260.3 CFTR CDH1 LTBP1 CALCRL TGFBR3 TIGAR SFRP1 ENG RIPOR2 GPLD1 LIFR FAM162A FOXP1 IGFBP5 IL1R1 IL18R1 HDAC1 ARHGEF2 TNFAIP3 KL…
0.000133894332014248	231	3287	Cell surface receptor signaling pathway	SEMA3F CD9 TIE1 CACNG4 CXCL2 CD82 IRAK3 EFNB1 TGFB2 SFRP1 PLAT MET TSPAN13 CXCL12 DUSP22 HBEGF UPK1B ACVR1 IGFBP5 TNFAIP3 PGF TGFB3 CD274 CXCL6 BMP2 KDR BCL2L2 ITGB4 SPART EPHB2 IRAK2 WNT2B PDGFRA TSPAN31 PLXNC1 SPRY2 TLE3 NTRK3 EPHA5 IGFBP3 CTF1 FOXO1 FZD7 GDF6 NRG1 TSPAN18 SH2B2 PLPP3 WNT4 INHBB CXCL5 CXCL1 OTUD4 GPRC5B RSPO1 NPR1 CXCL8 SEMA3E CD14 PDGFD HAP1 RGMB FZD4 ERBB4 GRIN2A IFITM1 PTCH1…
0.000143979963296171	55	526	Regulation of protein serine/threonine kinase activity	IRAK3 CCNE1 CCNJ CDK5RAP3 MAP2K6 CCNA1 SPRY2 MAPK8IP3 CCNA2 PDGFD LIME1 ARHGEF5 CEMIP TPD52L1 BMP2 APOE NTRK3 CDKN2B HMGA2 FGF18 TLR6 SFRP1 STK3 HSPB1 TESK1 MAP3K8 MAPK10 RGS2 TNFAIP3 TGFB3 CDKN1A SESN2 EPHB2 ARRB1 ADORA1 LPAR3 CSPG4 FZD4 CDK5R1 PRKAG1 IQGAP3 DUSP8 AGER CCNL2 PARP16 TNFRSF11A NRG1 PRKCD PRKAA1 DUSP22 RGS4 IRAK2 DIRAS3 CDC25A S1PR2
0.00018559686796164	57	558	Positive regulation of cellular component movement	SEMA3F CXCL12 PGF SEMA3E PDGFD MYLK TGFB2 CTSH CEMIP VSIR PLAU KDR PDGFRA FGF7 NTRK3 FGF18 PDCD6 NRP1 BDKRB1 CORO1A RIPOR2 HBEGF SELENOK IL1R1 ARHGEF2 CD274 BMP2 P2RX4 PLAA MAPK8IP3 ITGA2 MAPRE2 ANO6 SLC8A1 CCBE1 HMOX1 ACVR1 IGFBP5 ENPP2 ZNF268 MET HSPB1 SOD2 GPLD1 FOXP1 DOCK4 SPRY2 DAB2 RNF207 PLPP3 JCAD ATOH8 AGER MAP2 SPN NRP2 CXCL8
0.000186061584271445	137	1756	Regulation of cell proliferation	CD38 TGFB2 CCNE1 CCNJ DUSP22 HBEGF LIFR PGF TGFB3 CD274 KDR CCNA1 IL6ST PDGFRA IL11RA CCNA2 BTG2 JCAD PDGFD ERBB4 WT1 SULF2 FP565260.3 HMOX1 NDRG4 SFRP1 SOD2 GPLD1 IGFBP5 CD46 TNFAIP3 CDKN1A BMP2 APOE FGF7 NTRK3 IGFBP3 HMGA2 DDAH1 VCAM1 CTNNB1 IL7R APLN PODN ZBTB7C ADGRG1 AQP1 PDCD6 CD9 CDON HIPK2 CALCRL NOTCH3 EFNB1 HSF4 CORO1A SMPD3 CTSH STK3 NDRG1 CDK6 NAMPT CXCL12 FBXW4 PMP22 SELENOK HDAC1 RA…
0.000188874688957682	245	3547	Response to organic substance	SESN1 CXCL2 IRAK3 TGFB2 SCD PCK2 MXRA5 CXCL12 MAPK10 DUSP22 ACVR1 PGF TGFB3 CD274 SERP1 NCOA3 CXCL6 BMP2 THRA SESN2 RAMP2 RAMP1 LPIN3 SPART IRAK2 SPRY2 PARP16 NTRK3 FOXO1 GDF6 SH2B2 CXCL5 CXCL1 OTUD4 CXCL8 CD14 PAQR8 HAP1 TLR6 RGMB PAQR7 WT1 IFITM1 GNG2 PALM3 SULF2 FP565260.3 CFTR CDH1 LTBP1 CALCRL TGFBR3 SFRP1 ENG RIPOR2 GPLD1 LIFR FOXP1 IGFBP5 IL1R1 IL18R1 HDAC1 ARHGEF2 TNFAIP3 KLF9 EGR1 ADCY7 …
0.000191246162903956	213	3006	Regulation of protein metabolic process	SAMD4A IRAK3 TGFB2 NDRG4 STK3 CCNE1 BBC3 CCNJ MAP3K8 CDK5RAP3 MAP2K6 DUSP22 PGF TGFB3 TNFRSF8 BMP2 HIP1 KDR DPH2 CCNA1 IL6ST PDGFRA SERPINE2 SPRY2 DCUN1D5 PAK6 MAPK8IP3 NTRK3 CCNA2 ZFP36L2 GDF6 NRG1 INHBB OTUD4 SERPINB9 PDGFD TADA2B SBK2 LIME1 C8ORF88 RNF128 IGF2BP3 FZD7 CTNNB1 ARHGEF5 UBE2D1 TBC1D10A CTSH CEMIP SFRP1 PLAT ENG VSIR TPD52L1 GPLD1 FAM162A ACVR1 IGFBP5 ARHGEF2 TNFAIP3 EGR1 TNFSF10 C…
0.000192506680150031	66	687	Blood vessel development	CALCRL TIE1 PGF KDR RAMP2 RAMP1 JCAD CDH2 CTNNB1 HIPK2 TGFB2 HMOX1 ADM2 KLF4 CCN3 BMPER CXCL8 ADGRG1 PDCD6 NRXN3 CUL7 ADAMTS6 LTBP1 NOTCH3 NRP1 CTSH ENG ACVR1 NRP2 PIK3CA SOX4 C3 ID1 APOE EPHB2 PDGFRA ENPP2 FOXO1 DDAH1 FGF18 CITED2 LUZP1 SEMA3E PDGFD APLN CSPG4 FZD4 GPR4 CDH5 CCBE1 MYLK HSPB1 GPLD1 PTGIS KLF2 SPRY2 HK2 WNT4 AQP1 TGFBR3 SFRP1 EGR1 HMGA2 WT1 TNFAIP3 NPR1
0.000192506680150031	162	2165	Cell proliferation	CD38 TGFB2 CCNE1 CCNJ DUSP22 HBEGF LIFR PGF TGFB3 CD274 KDR CCNA1 IL6ST PDGFRA IL11RA CCNA2 BTG2 JCAD PDGFD ERBB4 WT1 GNG2 SULF2 FP565260.3 HMOX1 NDRG4 SFRP1 CDK5RAP3 SOD2 GPLD1 IGFBP5 ARHGEF2 CD46 TNFAIP3 CDKN1A BMP2 APOE WNT2B CCN3 FGF7 NTRK3 IGFBP3 HMGA2 DDAH1 STC1 VCAM1 CITED2 BMPER CTNNB1 IL7R APLN PODN ZBTB7C ADGRG1 AQP1 PDCD6 CD9 CDON HIPK2 CALCRL NOTCH3 EFNB1 HSF4 CORO1A SMPD3 CTSH STK3 N…
0.000192506680150031	60	603	Blood vessel morphogenesis	CALCRL TIE1 PGF KDR RAMP2 RAMP1 JCAD CDH2 CTNNB1 HIPK2 TGFB2 HMOX1 ADM2 KLF4 CCN3 BMPER CXCL8 ADGRG1 PDCD6 NRXN3 CUL7 NOTCH3 NRP1 CTSH ENG ACVR1 NRP2 PIK3CA SOX4 C3 ID1 APOE EPHB2 PDGFRA ENPP2 DDAH1 FGF18 CITED2 SEMA3E APLN CSPG4 FZD4 GPR4 CCBE1 CDH5 MYLK HSPB1 GPLD1 PTGIS KLF2 SPRY2 HK2 WNT4 AQP1 TGFBR3 SFRP1 HMGA2 WT1 TNFAIP3 NPR1
0.000193448842834697	219	3113	Intracellular signal transduction	HMOX1 APOL3 SLC20A1 CXXC5 C18ORF32 ARHGAP33 RAB27B SESN1 ARHGAP28 IRAK3 TGFB2 NDRG4 STK3 DMPK BBC3 RAB3D MAP3K8 MAP2K6 MAPK10 ADGRD1 DUSP22 DNAJC27 RHOU TGFB3 ADCY7 PIK3CA BMP2 KDR CDC42EP1 BCL2L2 SESN2 PRKAA1 IRAK2 IL6ST PDGFRA SPRY2 DGKB PAK6 MAPK8IP3 RAB20 NTRK3 GDF6 NRG1 SH2B2 INHBB PRKCI PRKCD CCDC68 GPRC5B CD14 PDGFD RCAN2 RND1 EPS8L2 GPR4 CDC42EP4 PLCB1 GNG2 SBK2 LIME1 ADGRG1 RAB7B HIP1 FZ…
0.000229000286895821	199	2785	Anatomical structure morphogenesis	SEMA3F CD9 CDH1 CDH3 CALCRL TIE1 IGSF9 EFNB1 AMH PMP22 RHOU PGF THRA KDR CDC42EP1 RAMP2 RAMP1 EPHB2 PLXNC1 TMOD1 CDH11 EPHA5 DCDC2 CDH8 COL6A3 JCAD MAP1A LUZP1 SEMA3E CDH2 RND1 FZD4 MIEF2 CDH4 SLITRK4 CDC42EP4 CDH5 HES4 SULF2 CTNNB1 HIPK2 SYT1 TGFBR3 TGFB2 HMOX1 MET BMP2 ADM2 KLF4 CCN3 FGF7 NRG1 STC1 BMPER CXCL8 KRT19 PLD6 ADGRG1 PDCD6 ARHGAP33 CELSR3 NRXN3 CUL7 CDON NEO1 TNFRSF1A BCL3 MPP5 NOTCH…
0.000258028977075194	41	358	Transmembrane receptor protein serine/threonine kinase signaling pathway	TGFB2 DUSP22 ACVR1 TGFB3 BMP2 SPART GDF6 INHBB RGMB LTBP1 HIPK2 TGFBR3 ENG DAB2 NBL1 BMPER ATOH8 CDH5 TRIM33 FUT8 NEO1 SMPD3 SFRP1 SNX25 EGR1 GIPC1 ID1 LRP4 CCN3 NCEH1 CRB2 CITED2 HTRA1 HTRA3 CHST11 MAGI2 CDKN2B UBE2D1 AMH UBE2D3 CGN
0.000258028977075194	25	167	Positive regulation of angiogenesis	TIE1 PGF KDR JCAD HIPK2 HMOX1 ADM2 CXCL8 PDCD6 NRP1 CTSH ENG C3 RAMP2 DDAH1 CCBE1 KLF4 FGF18 BMPER CDH5 HSPB1 PTGIS HK2 AQP1 HMGA2
0.000258028977075194	68	724	Cardiovascular system development	CALCRL MYLK TIE1 PGF KDR RAMP2 RAMP1 JCAD CDH2 FZD4 CTNNB1 HIPK2 TGFB2 HMOX1 SOD2 ADM2 KLF4 CCN3 BMPER CXCL8 ADGRG1 PDCD6 NRXN3 CUL7 ADAMTS6 LTBP1 NOTCH3 NRP1 CTSH ENG ACVR1 NRP2 PIK3CA SOX4 C3 ID1 APOE EPHB2 PDGFRA ENPP2 CRB2 FOXO1 DDAH1 FGF18 CITED2 LUZP1 SEMA3E PDGFD APLN CSPG4 GPR4 CDH5 CCBE1 HSPB1 GPLD1 PTGIS KLF2 SPRY2 HK2 WNT4 AQP1 TGFBR3 SFRP1 EGR1 HMGA2 WT1 TNFAIP3 NPR1
0.000258028977075194	92	1077	Circulatory system development	CALCRL MYLK TIE1 ACVR1 PGF KDR RAMP2 RAMP1 JCAD CDH2 FZD4 ZFPM1 CTNNB1 HIPK2 TGFBR3 TGFB2 HMOX1 SOD2 BMP2 ADM2 KLF4 CCN3 NRG1 BMPER CXCL8 ADGRG1 PDCD6 NRXN3 CUL7 ADAMTS6 LTBP1 TNFRSF1A NOTCH3 NRP1 NDRG4 CTSH STK3 ENG RGS2 RGS4 NRP2 PIK3CA CDKN1A SOX4 C3 ID1 APOE EPHB2 PDGFRA ENPP2 CRB2 TENM4 FOXO1 DDAH1 PDLIM3 FGF18 DHRS3 VCAM1 CITED2 DCHS1 KCNAB1 LUZP1 SEMA3E PDGFD APLN CSPG4 GPR4 ERBB4 CDH5 CCB…
0.000265152277905595	55	544	Positive regulation of cell motility	SEMA3F CXCL12 PGF SEMA3E PDGFD MYLK TGFB2 CTSH CEMIP VSIR PLAU KDR PDGFRA FGF7 NTRK3 FGF18 PDCD6 NRP1 BDKRB1 CORO1A RIPOR2 HBEGF SELENOK IL1R1 ARHGEF2 CD274 BMP2 P2RX4 PLAA MAPK8IP3 ITGA2 MAPRE2 ANO6 SLC8A1 CCBE1 HMOX1 ACVR1 IGFBP5 ENPP2 ZNF268 MET HSPB1 SOD2 GPLD1 FOXP1 DOCK4 SPRY2 DAB2 PLPP3 JCAD ATOH8 AGER SPN NRP2 CXCL8
0.000283132580218868	159	2139	Movement of cell or subcellular component	SEMA3F FSCN1 CXCL2 IGSF9 EFNB1 PLAT SCN1B MET CXCL12 TNFAIP3 PGF PIK3CA CXCL6 KDR ITGB4 EPHB2 NAV1 BICDL1 PLXNC1 PAK6 EPHA5 DCDC2 CXCL5 CXCL1 KIFC2 CXCL8 SEMA3E PDGFD RND1 HAP1 SBK2 CD9 MYLK TGFBR3 TGFB2 NDRG4 CTSH CEMIP SFRP1 ENG VSIR IGFBP5 PLAU MGAT3 APOE PDGFRA KLF4 ENPP2 CCN3 FGF7 NTRK3 IGFBP3 FGF18 STC1 VCAM1 BMPER HOXB9 PODN ERBB4 ADGRG1 PDCD6 CELSR3 FUT8 RAB27B ARHGEF5 TIE1 NEO1 NRP1 BDKR…
0.000283132580218868	145	1911	Positive regulation of multicellular organismal process	LRRC7 TIE1 PGF TNFRSF8 KDR PLXNC1 NTRK3 JCAD GPRC5B CD14 SULF2 HIPK2 SYT1 TGFB2 HMOX1 SOD2 ACVR1 IL1R1 IL18R1 ARHGEF2 CD46 TGFB3 CD274 C3 BMP2 ADM2 APOE SERPINE2 HLA-F FGF7 DAB2 FGF18 WNT4 POLR3D AFAP1L2 CXCL8 CEBPB C1QTNF1 ZFPM1 CCBE1 SPN PDCD6 CD38 YBX3 CDON BCL3 IGSF9B IRAK3 NRP1 ATP11C CTSH SCN1B HSPB1 ENG CXCL12 HBEGF SELENOK DLX2 HDAC1 RGS2 RGS4 TNFAIP3 EGR1 SERP1 ATF1 THRA RAMP2 PRKAA1 EPH…
0.000283841620384525	67	715	Vasculature development	CALCRL TIE1 PGF KDR RAMP2 RAMP1 JCAD CDH2 FZD4 CTNNB1 HIPK2 TGFB2 HMOX1 SOD2 ADM2 KLF4 CCN3 BMPER CXCL8 ADGRG1 PDCD6 NRXN3 CUL7 ADAMTS6 LTBP1 NOTCH3 NRP1 CTSH ENG ACVR1 NRP2 PIK3CA SOX4 C3 ID1 APOE EPHB2 PDGFRA ENPP2 FOXO1 DDAH1 FGF18 CITED2 LUZP1 SEMA3E PDGFD APLN CSPG4 GPR4 CDH5 CCBE1 MYLK HSPB1 GPLD1 PTGIS KLF2 SPRY2 HK2 WNT4 AQP1 TGFBR3 SFRP1 EGR1 HMGA2 WT1 TNFAIP3 NPR1
0.000283841620384525	36	298	Regulation of angiogenesis	TIE1 PGF KDR JCAD HIPK2 TGFB2 HMOX1 ADM2 KLF4 CXCL8 PDCD6 NRP1 CTSH ENG C3 ID1 RAMP2 ENPP2 DDAH1 CTNNB1 SEMA3E GPR4 CCBE1 FGF18 BMPER CDH5 HSPB1 PTGIS KLF2 SPRY2 HK2 AQP1 SFRP1 HMGA2 TNFAIP3 NPR1
0.000314709972837552	89	1041	Regulation of locomotion	SEMA3F CXCL12 PGF PLXNC1 SEMA3E PDGFD RND1 MYLK TGFB2 NDRG4 CTSH CEMIP SFRP1 ENG VSIR IGFBP5 PLAU KDR MGAT3 APOE PDGFRA KLF4 ENPP2 FGF7 NTRK3 IGFBP3 FGF18 STC1 BMPER PODN PDCD6 CD9 TIE1 NRP1 BDKRB1 CORO1A SMPD3 RIPOR2 HBEGF ARRDC3 SELENOK IL1R1 ARHGEF2 SSX2IP CD274 BMP2 P2RX4 PLAA MAPK8IP3 IGSF10 NRG1 NBL1 WNT4 ADORA1 ITGA2 MAPRE2 ANO6 ERBB4 PLCB1 SLC8A1 CCBE1 SPN AGER ADGRG1 HMOX1 ACVR1 CHMP3 CX…
0.000322801861731754	28	205	Muscle cell proliferation	TGFB2 HMOX1 NDRG4 SOD2 IGFBP5 TNFAIP3 TGFB3 CCN3 IGFBP3 CALCRL NOTCH3 SMPD3 NAMPT HBEGF KLF4 TENM4 ITGA2 CITED2 NPR1 PDGFD ERBB4 TGM2 CNN1 FOXP1 CDKN1A CTNNB1 APLN TGFBR3
0.000322801861731754	164	2230	Cell development	SEMA3F LRRC7 MAP2 IGSF9 EFNB1 TGFB2 TGFB3 BMP2 ID1 EPHB2 PLXNC1 TMOD1 NTRK3 EPHA5 TENM2 DCDC2 TENM4 GDF6 INHBB COL6A3 MAP1A GPRC5B SEMA3E CDH2 ID4 SLITRK4 HES4 SULF2 ZNF488 SYT1 CDK6 MET FOXP1 ARHGEF2 APOE SERPINE2 SPOCK1 STC1 KRT19 RND1 CFTR CD38 ARHGAP33 CELSR3 CD9 CDH1 CDON NEO1 MPP5 NOTCH3 TIGAR NRP1 PABPC1L HSF4 SMPD3 SFRP1 NDRG1 AMH SCN1B ENG CXCL12 PMP22 RIPOR2 ACVR1 PCSK4 DLX2 HDAC1 RGS2 …
0.000330856250367577	23	150	Smooth muscle cell proliferation	HMOX1 NDRG4 SOD2 IGFBP5 TNFAIP3 TGFB3 CCN3 IGFBP3 CALCRL NOTCH3 SMPD3 NAMPT HBEGF KLF4 ITGA2 NPR1 PDGFD TGM2 CNN1 FOXP1 CDKN1A CTNNB1 APLN
0.000366319523399977	158	2138	Regulation of multicellular organismal development	SEMA3F LRRC7 TIE1 PGF ID1 KDR PLXNC1 NTRK3 JCAD GPRC5B SEMA3E CDH2 ID4 HES4 SULF2 HIPK2 SYT1 TGFB2 HMOX1 SFRP1 CDK6 SOD2 FOXP1 ACVR1 ARHGEF2 CD46 TGFB3 BMP2 ADM2 APOE SERPINE2 KLF4 FGF7 SPOCK1 DAB2 WNT4 ATOH8 CXCL8 CEBPB ZFPM1 L3MBTL1 PDCD6 CD38 ARHGAP33 CELSR3 YBX3 CDON NOTCH3 MAP2 IRAK3 NRP1 ATP11C SMPD3 CTSH STK3 AMH SCN1B ENG CXCL12 PMP22 DLX2 HDAC1 RGS2 MYCL RGS4 TNFAIP3 ATF1 C3 LRFN1 RAMP2 …

## Sheet: Table S6A
Table S6A. Gene-set (GS) enrichment analysis of DE genes in 12Z cells upon LINC01133 knockdown.
Gene Set Name	# Genes in Gene Set (K)	# Genes in Overlap (k)	k/K	p-value	FDR q-value	coding number
NUYTTEN_EZH2_TARGETS_UP	1033	125	0.1210	9.06E-42	1.37E-37	1
CUI_DEVELOPING_HEART_C6_EPICARDIAL_CELL	195	54	0.2769	5.17E-37	3.91E-33	2
MURARO_PANCREAS_DUCTAL_CELL	1276	129	0.1011	6.79E-35	2.52E-31	3
HAY_BONE_MARROW_STROMAL	765	98	0.1281	7.15E-35	2.52E-31	4
MEISSNER_BRAIN_HCP_WITH_H3K4ME3_AND_H3K27ME3	1071	117	0.1092	8.33E-35	2.52E-31	5
WONG_ADULT_TISSUE_STEM_MODULE	719	91	0.1266	5.07E-32	1.28E-28	6
LEE_BMP2_TARGETS_UP	773	94	0.1216	1.13E-31	2.45E-28	7
MURARO_PANCREAS_MESENCHYMAL_STROMAL_CELL	680	86	0.1265	2.78E-30	4.68E-27	9

## Sheet: Table S6B
Table S6B. Gene-set (GS) enrichment analysis of DE genes in 12Z cells upon LINC01133 knockdown.
Entrez Gene Id	Gene Symbol	Gene Description	coding number
715	C1R	complement C1r [Source:HGNC Symbol;Acc:HGNC:1246]	1	2	3	4	6	7	9
716	C1S	complement C1s [Source:HGNC Symbol;Acc:HGNC:1247]	1	2	3	4	7	9
3572	IL6ST	interleukin 6 signal transducer [Source:HGNC Symbol;Acc:HGNC:6021]	1	2	3	4
8671	SLC4A4	solute carrier family 4 member 4 [Source:HGNC Symbol;Acc:HGNC:11030]	1	2	3	5
9945	GFPT2	glutamine-fructose-6-phosphate transaminase 2 [Source:HGNC Symbol;Acc:HGNC:4242]	1	2	9
467	ATF3	activating transcription factor 3 [Source:HGNC Symbol;Acc:HGNC:785]	1	3	4	5	6
91107	TRIM47	tripartite motif containing 47 [Source:HGNC Symbol;Acc:HGNC:19020]	1	3	4	5	6
51704	GPRC5B	G protein-coupled receptor class C group 5 member B [Source:HGNC Symbol;Acc:HGNC:13308]	1	3	4	6
8829	NRP1	neuropilin 1 [Source:HGNC Symbol;Acc:HGNC:8004]	1	3	4	9
2920	CXCL2	C-X-C motif chemokine ligand 2 [Source:HGNC Symbol;Acc:HGNC:4603]	1	3	4
1958	EGR1	early growth response 1 [Source:HGNC Symbol;Acc:HGNC:3238]	1	3	4
481	ATP1B1	ATPase Na+/K+ transporting subunit beta 1 [Source:HGNC Symbol;Acc:HGNC:804]	1	3	5	7
678	ZFP36L2	ZFP36 ring finger protein like 2 [Source:HGNC Symbol;Acc:HGNC:1108]	1	3	5
4856	CCN3	cellular communication network factor 3 [Source:HGNC Symbol;Acc:HGNC:7885]	1	3	5
7052	TGM2	transglutaminase 2 [Source:HGNC Symbol;Acc:HGNC:11778]	1	3	6	9
1051	CEBPB	CCAAT enhancer binding protein beta [Source:HGNC Symbol;Acc:HGNC:1834]	1	3	6	9
1026	CDKN1A	cyclin dependent kinase inhibitor 1A [Source:HGNC Symbol;Acc:HGNC:1784]	1	3	6
58480	RHOU	ras homolog family member U [Source:HGNC Symbol;Acc:HGNC:17794]	1	3	6
9586	CREB5	cAMP responsive element binding protein 5 [Source:HGNC Symbol;Acc:HGNC:16844]	1	3	7
771	CA12	carbonic anhydrase 12 [Source:HGNC Symbol;Acc:HGNC:1371]	1	3	7
7980	TFPI2	tissue factor pathway inhibitor 2 [Source:HGNC Symbol;Acc:HGNC:11761]	1	3	9
80176	SPSB1	splA/ryanodine receptor domain and SOCS box containing 1 [Source:HGNC Symbol;Acc:HGNC:30628]	1	3	9
6648	SOD2	superoxide dismutase 2 [Source:HGNC Symbol;Acc:HGNC:11180]	1	3
3576	CXCL8	C-X-C motif chemokine ligand 8 [Source:HGNC Symbol;Acc:HGNC:6025]	1	3
2919	CXCL1	C-X-C motif chemokine ligand 1 [Source:HGNC Symbol;Acc:HGNC:4602]	1	3
7128	TNFAIP3	TNF alpha induced protein 3 [Source:HGNC Symbol;Acc:HGNC:11896]	1	3
8743	TNFSF10	TNF superfamily member 10 [Source:HGNC Symbol;Acc:HGNC:11925]	1	3
10135	NAMPT	nicotinamide phosphoribosyltransferase [Source:HGNC Symbol;Acc:HGNC:30092]	1	3
3134	HLA-F	major histocompatibility complex	1	3
5874	RAB27B	RAB27B	1	3
81537	SGPP1	sphingosine-1-phosphate phosphatase 1 [Source:HGNC Symbol;Acc:HGNC:17720]	1	3
3157	HMGCS1	3-hydroxy-3-methylglutaryl-CoA synthase 1 [Source:HGNC Symbol;Acc:HGNC:5007]	1	3
22795	NID2	nidogen 2 [Source:HGNC Symbol;Acc:HGNC:13389]	1	4	5	6	9
54361	WNT4	Wnt family member 4 [Source:HGNC Symbol;Acc:HGNC:12783]	1	4	5
3486	IGFBP3	insulin like growth factor binding protein 3 [Source:HGNC Symbol;Acc:HGNC:5472]	1	4	6	9
55323	LARP6	La ribonucleoprotein 6	1	4	7
83604	TMEM47	transmembrane protein 47 [Source:HGNC Symbol;Acc:HGNC:18515]	1	4	9
1009	CDH11	cadherin 11 [Source:HGNC Symbol;Acc:HGNC:1750]	1	4	9
1307	COL16A1	collagen type XVI alpha 1 chain [Source:HGNC Symbol;Acc:HGNC:2193]	1	4	9
2252	FGF7	fibroblast growth factor 7 [Source:HGNC Symbol;Acc:HGNC:3685]	1	4	9
5806	PTX3	pentraxin 3 [Source:HGNC Symbol;Acc:HGNC:9692]	1	4
11067	DEPP1	DEPP1 autophagy regulator [Source:HGNC Symbol;Acc:HGNC:23355]	1	4
23580	CDC42EP4	CDC42 effector protein 4 [Source:HGNC Symbol;Acc:HGNC:17147]	1	4
57537	SORCS2	sortilin related VPS10 domain containing receptor 2 [Source:HGNC Symbol;Acc:HGNC:16698]	1	5	6	7
9314	KLF4	Kruppel like factor 4 [Source:HGNC Symbol;Acc:HGNC:6348]	1	5	6
10397	NDRG1	N-myc downstream regulated 1 [Source:HGNC Symbol;Acc:HGNC:7679]	1	5	6
25893	TRIM58	tripartite motif containing 58 [Source:HGNC Symbol;Acc:HGNC:24150]	1	5
5270	SERPINE2	serpin family E member 2 [Source:HGNC Symbol;Acc:HGNC:8951]	1	5
3099	HK2	hexokinase 2 [Source:HGNC Symbol;Acc:HGNC:4923]	1	5
56548	CHST7	carbohydrate sulfotransferase 7 [Source:HGNC Symbol;Acc:HGNC:13817]	1	5
54852	PAQR5	progestin and adipoQ receptor family member 5 [Source:HGNC Symbol;Acc:HGNC:29645]	1	5
1746	DLX2	distal-less homeobox 2 [Source:HGNC Symbol;Acc:HGNC:2915]	1	5
135398	C6orf141	chromosome 6 open reading frame 141 [Source:HGNC Symbol;Acc:HGNC:21351]	1	5
6275	S100A4	S100 calcium binding protein A4 [Source:HGNC Symbol;Acc:HGNC:10494]	1	6
5999	RGS4	regulator of G protein signaling 4 [Source:HGNC Symbol;Acc:HGNC:10000]	1	6
11080	DNAJB4	DnaJ heat shock protein family (Hsp40) member B4 [Source:HGNC Symbol;Acc:HGNC:14886]	1	6
4189	DNAJB9	DnaJ heat shock protein family (Hsp40) member B9 [Source:HGNC Symbol;Acc:HGNC:6968]	1	6
164091	PAQR7	progestin and adipoQ receptor family member 7 [Source:HGNC Symbol;Acc:HGNC:23146]	1	6
113146	AHNAK2	AHNAK nucleoprotein 2 [Source:HGNC Symbol;Acc:HGNC:20125]	1	7
8519	IFITM1	interferon induced transmembrane protein 1 [Source:HGNC Symbol;Acc:HGNC:5412]	1	7	9
5327	PLAT	plasminogen activator	1	7	9
2308	FOXO1	forkhead box O1 [Source:HGNC Symbol;Acc:HGNC:3819]	1	7
6567	SLC16A2	solute carrier family 16 member 2 [Source:HGNC Symbol;Acc:HGNC:10923]	1	7
90427	BMF	Bcl2 modifying factor [Source:HGNC Symbol;Acc:HGNC:24132]	1	7
23503	ZFYVE26	zinc finger FYVE-type containing 26 [Source:HGNC Symbol;Acc:HGNC:20761]	1	7
51131	PHF11	PHD finger protein 11 [Source:HGNC Symbol;Acc:HGNC:17024]	1	7
6415	SELENOW	selenoprotein W [Source:HGNC Symbol;Acc:HGNC:10752]	1	7
59269	HIVEP3	HIVEP zinc finger 3 [Source:HGNC Symbol;Acc:HGNC:13561]	1
4133	MAP2	microtubule associated protein 2 [Source:HGNC Symbol;Acc:HGNC:6839]	1
54899	PXK	PX domain containing serine/threonine kinase like [Source:HGNC Symbol;Acc:HGNC:23326]	1
286	ANK1	ankyrin 1 [Source:HGNC Symbol;Acc:HGNC:492]	1
8497	PPFIA4	PTPRF interacting protein alpha 4 [Source:HGNC Symbol;Acc:HGNC:9248]	1
23341	DNAJC16	DnaJ heat shock protein family (Hsp40) member C16 [Source:HGNC Symbol;Acc:HGNC:29157]	1
29940	DSE	dermatan sulfate epimerase [Source:HGNC Symbol;Acc:HGNC:21144]	1	9
7043	TGFB3	transforming growth factor beta 3 [Source:HGNC Symbol;Acc:HGNC:11769]	1	9
54838	WBP1L	WW domain binding protein 1 like [Source:HGNC Symbol;Acc:HGNC:23510]	1	9
22808	MRAS	muscle RAS oncogene homolog [Source:HGNC Symbol;Acc:HGNC:7227]	1	9
56681	SAR1A	secretion associated Ras related GTPase 1A [Source:HGNC Symbol;Acc:HGNC:10534]	1	9
80833	APOL3	apolipoprotein L3 [Source:HGNC Symbol;Acc:HGNC:14868]	1
25780	RASGRP3	RAS guanyl releasing protein 3 [Source:HGNC Symbol;Acc:HGNC:14545]	1
152926	PPM1K	protein phosphatase	1
6715	SRD5A1	steroid 5 alpha-reductase 1 [Source:HGNC Symbol;Acc:HGNC:11284]	1
2048	EPHB2	EPH receptor B2 [Source:HGNC Symbol;Acc:HGNC:3393]	1
285704	RGMB	repulsive guidance molecule BMP co-receptor b [Source:HGNC Symbol;Acc:HGNC:26896]	1
2745	GLRX	glutaredoxin [Source:HGNC Symbol;Acc:HGNC:4330]	1
353322	ANKRD37	ankyrin repeat domain 37 [Source:HGNC Symbol;Acc:HGNC:29593]	1
8862	APLN	apelin [Source:HGNC Symbol;Acc:HGNC:16665]	1
56648	EIF5A2	eukaryotic translation initiation factor 5A2 [Source:HGNC Symbol;Acc:HGNC:3301]	1
6646	SOAT1	sterol O-acyltransferase 1 [Source:HGNC Symbol;Acc:HGNC:11177]	1
8091	HMGA2	high mobility group AT-hook 2 [Source:HGNC Symbol;Acc:HGNC:5009]	1
57561	ARRDC3	arrestin domain containing 3 [Source:HGNC Symbol;Acc:HGNC:29263]	1
5325	PLAGL1	PLAG1 like zinc finger 1 [Source:HGNC Symbol;Acc:HGNC:9046]	1
157567	ANKRD46	ankyrin repeat domain 46 [Source:HGNC Symbol;Acc:HGNC:27229]	1
201164	PLD6	phospholipase D family member 6 [Source:HGNC Symbol;Acc:HGNC:30447]	1
8202	NCOA3	nuclear receptor coactivator 3 [Source:HGNC Symbol;Acc:HGNC:7670]	1
3162	HMOX1	heme oxygenase 1 [Source:HGNC Symbol;Acc:HGNC:5013]	1
5290	PIK3CA	phosphatidylinositol-4	1
9819	TSC22D2	TSC22 domain family member 2 [Source:HGNC Symbol;Acc:HGNC:29095]	1
54619	CCNJ	cyclin J [Source:HGNC Symbol;Acc:HGNC:23434]	1
27230	SERP1	stress associated endoplasmic reticulum protein 1 [Source:HGNC Symbol;Acc:HGNC:10759]	1
11174	ADAMTS6	ADAM metallopeptidase with thrombospondin type 1 motif 6 [Source:HGNC Symbol;Acc:HGNC:222]	1
64398	MPP5	membrane palmitoylated protein 5 [Source:HGNC Symbol;Acc:HGNC:18669]	1
221079	ARL5B	ADP ribosylation factor like GTPase 5B [Source:HGNC Symbol;Acc:HGNC:23052]	1
84541	KBTBD8	kelch repeat and BTB domain containing 8 [Source:HGNC Symbol;Acc:HGNC:30691]	1
27113	BBC3	BCL2 binding component 3 [Source:HGNC Symbol;Acc:HGNC:17868]	1
23052	ENDOD1	endonuclease domain containing 1 [Source:HGNC Symbol;Acc:HGNC:29129]	1
55332	DRAM1	DNA damage regulated autophagy modulator 1 [Source:HGNC Symbol;Acc:HGNC:25645]	1
623	BDKRB1	bradykinin receptor B1 [Source:HGNC Symbol;Acc:HGNC:1029]	1
91947	ARRDC4	arrestin domain containing 4 [Source:HGNC Symbol;Acc:HGNC:28087]	1
2530	FUT8	fucosyltransferase 8 [Source:HGNC Symbol;Acc:HGNC:4019]	1
23127	COLGALT2	collagen beta(1-O)galactosyltransferase 2 [Source:HGNC Symbol;Acc:HGNC:16790]	1
8548	BLZF1	basic leucine zipper nuclear factor 1 [Source:HGNC Symbol;Acc:HGNC:1065]	1
83931	STK40	serine/threonine kinase 40 [Source:HGNC Symbol;Acc:HGNC:21373]	1
28962	OSTM1	osteoclastogenesis associated transmembrane protein 1 [Source:HGNC Symbol;Acc:HGNC:21652]	1
282679	AQP11	aquaporin 11 [Source:HGNC Symbol;Acc:HGNC:19940]	1
89932	PAPLN	papilin	1
5210	PFKFB4	6-phosphofructo-2-kinase/fructose-2	1
130888	FBXO36	F-box protein 36 [Source:HGNC Symbol;Acc:HGNC:27020]	1
26355	FAM162A	family with sequence similarity 162 member A [Source:HGNC Symbol;Acc:HGNC:17865]	1
2230	FDX1	ferredoxin 1 [Source:HGNC Symbol;Acc:HGNC:3638]	1
8226	PUDP	pseudouridine 5'-phosphatase [Source:HGNC Symbol;Acc:HGNC:16818]	1
84259	DCUN1D5	defective in cullin neddylation 1 domain containing 5 [Source:HGNC Symbol;Acc:HGNC:28409]	1
80195	TMEM254	transmembrane protein 254 [Source:HGNC Symbol;Acc:HGNC:25804]	1
8514	KCNAB2	potassium voltage-gated channel subfamily A regulatory beta subunit 2 [Source:HGNC Symbol;Acc:HGNC:6229]	1
55113	XKR8	XK related 8 [Source:HGNC Symbol;Acc:HGNC:25508]	1
3554	IL1R1	interleukin 1 receptor type 1 [Source:HGNC Symbol;Acc:HGNC:5993]	2	3	4	6	9
389136	VGLL3	vestigial like family member 3 [Source:HGNC Symbol;Acc:HGNC:24327]	2	3	4
4071	TM4SF1	transmembrane 4 L six family member 1 [Source:HGNC Symbol;Acc:HGNC:11853]	2	3	4
6590	SLPI	secretory leukocyte peptidase inhibitor [Source:HGNC Symbol;Acc:HGNC:11092]	2	3	4
11098	PRSS23	serine protease 23 [Source:HGNC Symbol;Acc:HGNC:14370]	2	3	5	6	7
1525	CXADR	CXADR Ig-like cell adhesion molecule [Source:HGNC Symbol;Acc:HGNC:2559]	2	3	5
3855	KRT7	keratin 7 [Source:HGNC Symbol;Acc:HGNC:6445]	2	3	7
3856	KRT8	keratin 8 [Source:HGNC Symbol;Acc:HGNC:6446]	2	3	7
358	AQP1	aquaporin 1 (Colton blood group) [Source:HGNC Symbol;Acc:HGNC:633]	2	3	7
1612	DAPK1	death associated protein kinase 1 [Source:HGNC Symbol;Acc:HGNC:2674]	2	3	7
3880	KRT19	keratin 19 [Source:HGNC Symbol;Acc:HGNC:6436]	2	3	7
718	C3	complement C3 [Source:HGNC Symbol;Acc:HGNC:1318]	2	3
100505633	LINC01133	long intergenic non-protein coding RNA 1133 [Source:HGNC Symbol;Acc:HGNC:49447]	2	3
7348	UPK1B	uroplakin 1B [Source:HGNC Symbol;Acc:HGNC:12578]	2	3
5654	HTRA1	HtrA serine peptidase 1 [Source:HGNC Symbol;Acc:HGNC:9476]	2	4	5	6	7	9
3400	ID4	inhibitor of DNA binding 4	2	4	5	6
5740	PTGIS	prostaglandin I2 synthase [Source:HGNC Symbol;Acc:HGNC:9603]	2	4	5
140738	TMEM37	transmembrane protein 37 [Source:HGNC Symbol;Acc:HGNC:18216]	2	4	5
84935	MEDAG	mesenteric estrogen dependent adipogenesis [Source:HGNC Symbol;Acc:HGNC:25926]	2	4	6	9
151887	CCDC80	coiled-coil domain containing 80 [Source:HGNC Symbol;Acc:HGNC:30649]	4	7	9
5918	RARRES1	retinoic acid receptor responder 1 [Source:HGNC Symbol;Acc:HGNC:9867]	2	4
7132	TNFRSF1A	TNF receptor superfamily member 1A [Source:HGNC Symbol;Acc:HGNC:11916]	2	4
64115	VSIR	V-set immunoregulatory receptor [Source:HGNC Symbol;Acc:HGNC:30085]	2	5	7
55959	SULF2	sulfatase 2 [Source:HGNC Symbol;Acc:HGNC:20392]	2	5	9
3791	KDR	kinase insert domain receptor [Source:HGNC Symbol;Acc:HGNC:6307]	2	5
51090	PLLP	plasmolipin [Source:HGNC Symbol;Acc:HGNC:18553]	2	5
342527	SMTNL2	smoothelin like 2 [Source:HGNC Symbol;Acc:HGNC:24764]	2	5
283383	ADGRD1	adhesion G protein-coupled receptor D1 [Source:HGNC Symbol;Acc:HGNC:19893]	2	6
246	ALOX15	arachidonate 15-lipoxygenase [Source:HGNC Symbol;Acc:HGNC:433]	2	7
794	CALB2	calbindin 2 [Source:HGNC Symbol;Acc:HGNC:1435]	2
55512	SMPD3	sphingomyelin phosphodiesterase 3 [Source:HGNC Symbol;Acc:HGNC:14240]	2
26577	PCOLCE2	procollagen C-endopeptidase enhancer 2 [Source:HGNC Symbol;Acc:HGNC:8739]	2
57530	CGN	cingulin [Source:HGNC Symbol;Acc:HGNC:17429]	2
8869	ST3GAL5	ST3 beta-galactoside alpha-2	2
50937	CDON	cell adhesion associated	2
1001	CDH3	cadherin 3 [Source:HGNC Symbol;Acc:HGNC:1762]	2
54985	HCFC1R1	host cell factor C1 regulator 1 [Source:HGNC Symbol;Acc:HGNC:21198]	2
768	CA9	carbonic anhydrase 9 [Source:HGNC Symbol;Acc:HGNC:1383]	2
79094	CHAC1	ChaC glutathione specific gamma-glutamylcyclotransferase 1 [Source:HGNC Symbol;Acc:HGNC:28680]	2
92558	BICDL1	BICD family like cargo adaptor 1 [Source:HGNC Symbol;Acc:HGNC:28095]	2
7490	WT1	WT1 transcription factor [Source:HGNC Symbol;Acc:HGNC:12796]	2
222171	PRR15	proline rich 15 [Source:HGNC Symbol;Acc:HGNC:22310]	2
5584	PRKCI	protein kinase C iota [Source:HGNC Symbol;Acc:HGNC:9404]	2
83875	BCO2	beta-carotene oxygenase 2 [Source:HGNC Symbol;Acc:HGNC:18503]	2
5920	PLAAT4	phospholipase A and acyltransferase 4 [Source:HGNC Symbol;Acc:HGNC:9869]	2
93035	PKHD1L1	PKHD1 like 1 [Source:HGNC Symbol;Acc:HGNC:20313]	2
105375355	UPK3B	uroplakin 3B [Source:HGNC Symbol;Acc:HGNC:21444]	2
643650	LINC00842	long intergenic non-protein coding RNA 842 [Source:HGNC Symbol;Acc:HGNC:44989]	2
164312	LRRN4	leucine rich repeat neuronal 4 [Source:HGNC Symbol;Acc:HGNC:16208]	2
4651	MYO10	myosin X [Source:HGNC Symbol;Acc:HGNC:7593]	3	4	5	9
650	BMP2	bone morphogenetic protein 2 [Source:HGNC Symbol;Acc:HGNC:1069]	3	4	5
11135	CDC42EP1	CDC42 effector protein 1 [Source:HGNC Symbol;Acc:HGNC:17014]	3	4	5
7412	VCAM1	vascular cell adhesion molecule 1 [Source:HGNC Symbol;Acc:HGNC:12663]	3	4	6
4982	TNFRSF11B	TNF receptor superfamily member 11b [Source:HGNC Symbol;Acc:HGNC:11909]	3	4	6
55816	DOK5	docking protein 5 [Source:HGNC Symbol;Acc:HGNC:16173]	3	4
220	ALDH1A3	aldehyde dehydrogenase 1 family member A3 [Source:HGNC Symbol;Acc:HGNC:409]	3	4
1601	DAB2	DAB adaptor protein 2 [Source:HGNC Symbol;Acc:HGNC:2662]	3	5	6	9
5376	PMP22	peripheral myelin protein 22 [Source:HGNC Symbol;Acc:HGNC:9118]	3	5	6	9
1512	CTSH	cathepsin H [Source:HGNC Symbol;Acc:HGNC:2535]	3	5	7
999	CDH1	cadherin 1 [Source:HGNC Symbol;Acc:HGNC:1748]	3	5	7
2036	EPB41L1	erythrocyte membrane protein band 4.1 like 1 [Source:HGNC Symbol;Acc:HGNC:3378]	3	5
928	CD9	CD9 molecule [Source:HGNC Symbol;Acc:HGNC:1709]	3	5
9249	DHRS3	dehydrogenase/reductase 3 [Source:HGNC Symbol;Acc:HGNC:17693]	3	5
80310	PDGFD	platelet derived growth factor D [Source:HGNC Symbol;Acc:HGNC:30620]	3	5
7042	TGFB2	transforming growth factor beta 2 [Source:HGNC Symbol;Acc:HGNC:11768]	3	5
4162	MCAM	melanoma cell adhesion molecule [Source:HGNC Symbol;Acc:HGNC:6934]	3	5
1030	CDKN2B	cyclin dependent kinase inhibitor 2B [Source:HGNC Symbol;Acc:HGNC:1788]	3	5
2526	FUT4	fucosyltransferase 4 [Source:HGNC Symbol;Acc:HGNC:4015]	3	5
288	ANK3	ankyrin 3 [Source:HGNC Symbol;Acc:HGNC:494]	3	6	7
19	ABCA1	ATP binding cassette subfamily A member 1 [Source:HGNC Symbol;Acc:HGNC:29]	3	6	7	9
7164	TPD52L1	TPD52 like 1 [Source:HGNC Symbol;Acc:HGNC:12006]	3	6
1839	HBEGF	heparin binding EGF like growth factor [Source:HGNC Symbol;Acc:HGNC:3059]	3	6	9
23164	MPRIP	myosin phosphatase Rho interacting protein [Source:HGNC Symbol;Acc:HGNC:30321]	3	6
3397	ID1	inhibitor of DNA binding 1	3	6
6659	SOX4	SRY-box transcription factor 4 [Source:HGNC Symbol;Acc:HGNC:11200]	3	6
9208	LRRFIP1	LRR binding FLII interacting protein 1 [Source:HGNC Symbol;Acc:HGNC:6702]	3	6
27295	PDLIM3	PDZ and LIM domain 3 [Source:HGNC Symbol;Acc:HGNC:20767]	3	6
29887	SNX10	sorting nexin 10 [Source:HGNC Symbol;Acc:HGNC:14974]	3	6
79589	RNF128	ring finger protein 128 [Source:HGNC Symbol;Acc:HGNC:21153]	3	7
3691	ITGB4	integrin subunit beta 4 [Source:HGNC Symbol;Acc:HGNC:6158]	3	7
283131	NEAT1	nuclear paraspeckle assembly transcript 1 [Source:HGNC Symbol;Acc:HGNC:30815]	3	7
9071	CLDN10	claudin 10 [Source:HGNC Symbol;Acc:HGNC:2033]	3	7
79083	MLPH	melanophilin [Source:HGNC Symbol;Acc:HGNC:29643]	3	7
8507	ENC1	ectodermal-neural cortex 1 [Source:HGNC Symbol;Acc:HGNC:3345]	3	9
81606	LBH	LBH regulator of WNT signaling pathway [Source:HGNC Symbol;Acc:HGNC:29532]	3
128553	TSHZ2	teashirt zinc finger homeobox 2 [Source:HGNC Symbol;Acc:HGNC:13010]	3
6374	CXCL5	C-X-C motif chemokine ligand 5 [Source:HGNC Symbol;Acc:HGNC:10642]	3
283209	PGM2L1	phosphoglucomutase 2 like 1 [Source:HGNC Symbol;Acc:HGNC:20898]	3
5328	PLAU	plasminogen activator	3	9
2	A2M	alpha-2-macroglobulin [Source:HGNC Symbol;Acc:HGNC:7]	3	9
51363	CHST15	carbohydrate sulfotransferase 15 [Source:HGNC Symbol;Acc:HGNC:18137]	3	9
57608	JCAD	junctional cadherin 5 associated [Source:HGNC Symbol;Acc:HGNC:29283]	3	9
3673	ITGA2	integrin subunit alpha 2 [Source:HGNC Symbol;Acc:HGNC:6137]	3	9
1499	CTNNB1	catenin beta 1 [Source:HGNC Symbol;Acc:HGNC:2514]	3	9
196527	ANO6	anoctamin 6 [Source:HGNC Symbol;Acc:HGNC:25240]	3	9
6482	ST3GAL1	ST3 beta-galactoside alpha-2	3
3315	HSPB1	heat shock protein family B (small) member 1 [Source:HGNC Symbol;Acc:HGNC:5246]	3
4973	OLR1	oxidized low density lipoprotein receptor 1 [Source:HGNC Symbol;Acc:HGNC:8133]	3
10253	SPRY2	sprouty RTK signaling antagonist 2 [Source:HGNC Symbol;Acc:HGNC:11270]	3
4233	MET	MET proto-oncogene	3
23576	DDAH1	dimethylarginine dimethylaminohydrolase 1 [Source:HGNC Symbol;Acc:HGNC:2715]	3
5209	PFKFB3	6-phosphofructo-2-kinase/fructose-2	3
7798	LUZP1	leucine zipper protein 1 [Source:HGNC Symbol;Acc:HGNC:14985]	3
602	BCL3	BCL3 transcription coactivator [Source:HGNC Symbol;Acc:HGNC:998]	3
51088	KLHL5	kelch like family member 5 [Source:HGNC Symbol;Acc:HGNC:6356]	3
8531	YBX3	Y-box binding protein 3 [Source:HGNC Symbol;Acc:HGNC:2428]	3
1021	CDK6	cyclin dependent kinase 6 [Source:HGNC Symbol;Acc:HGNC:1777]	3
27063	ANKRD1	ankyrin repeat domain 1 [Source:HGNC Symbol;Acc:HGNC:15819]	3
283120	H19	H19 imprinted maternally expressed transcript [Source:HGNC Symbol;Acc:HGNC:4713]	3
79838	TMC5	transmembrane channel like 5 [Source:HGNC Symbol;Acc:HGNC:22999]	3
93010	B3GNT7	UDP-GlcNAc:betaGal beta-1	3
10766	TOB2	transducer of ERBB2	3
22838	RNF44	ring finger protein 44 [Source:HGNC Symbol;Acc:HGNC:19180]	3
9266	CYTH2	cytohesin 2 [Source:HGNC Symbol;Acc:HGNC:9502]	3
11259	FILIP1L	filamin A interacting protein 1 like [Source:HGNC Symbol;Acc:HGNC:24589]	3
84886	C1orf198	chromosome 1 open reading frame 198 [Source:HGNC Symbol;Acc:HGNC:25900]	3
8645	KCNK5	potassium two pore domain channel subfamily K member 5 [Source:HGNC Symbol;Acc:HGNC:6280]	3
58476	TP53INP2	tumor protein p53 inducible nuclear protein 2 [Source:HGNC Symbol;Acc:HGNC:16104]	3
9926	LPGAT1	lysophosphatidylglycerol acyltransferase 1 [Source:HGNC Symbol;Acc:HGNC:28985]	3
90407	TMEM41A	transmembrane protein 41A [Source:HGNC Symbol;Acc:HGNC:30544]	3
6574	SLC20A1	solute carrier family 20 member 1 [Source:HGNC Symbol;Acc:HGNC:10946]	3
3092	HIP1	huntingtin interacting protein 1 [Source:HGNC Symbol;Acc:HGNC:4913]	3
6372	CXCL6	C-X-C motif chemokine ligand 6 [Source:HGNC Symbol;Acc:HGNC:10643]	3
55917	CTTNBP2NL	CTTNBP2 N-terminal like [Source:HGNC Symbol;Acc:HGNC:25330]	3
51473	DCDC2	doublecortin domain containing 2 [Source:HGNC Symbol;Acc:HGNC:18141]	3
1359	CPA3	carboxypeptidase A3 [Source:HGNC Symbol;Acc:HGNC:2298]	3
54502	RBM47	RNA binding motif protein 47 [Source:HGNC Symbol;Acc:HGNC:30358]	3
57552	NCEH1	neutral cholesterol ester hydrolase 1 [Source:HGNC Symbol;Acc:HGNC:29260]	3
203111	ERICH5	glutamate rich 5 [Source:HGNC Symbol;Acc:HGNC:26823]	3
1080	CFTR	CF transmembrane conductance regulator [Source:HGNC Symbol;Acc:HGNC:1884]	3
1349	COX7B	cytochrome c oxidase subunit 7B [Source:HGNC Symbol;Acc:HGNC:2291]	3
80201	HKDC1	hexokinase domain containing 1 [Source:HGNC Symbol;Acc:HGNC:23302]	3
200373	CFAP221	cilia and flagella associated protein 221 [Source:HGNC Symbol;Acc:HGNC:33720]	3
3488	IGFBP5	insulin like growth factor binding protein 5 [Source:HGNC Symbol;Acc:HGNC:5474]	4	5	6	7	9
6387	CXCL12	C-X-C motif chemokine ligand 12 [Source:HGNC Symbol;Acc:HGNC:10672]	4	5	6	7
3625	INHBB	inhibin subunit beta B [Source:HGNC Symbol;Acc:HGNC:6067]	4	5	6	7
6422	SFRP1	secreted frizzled related protein 1 [Source:HGNC Symbol;Acc:HGNC:10776]	4	5	6	9
8613	PLPP3	phospholipid phosphatase 3 [Source:HGNC Symbol;Acc:HGNC:9229]	4	5	6
8324	FZD7	frizzled class receptor 7 [Source:HGNC Symbol;Acc:HGNC:4045]	4	5	7
9627	SNCAIP	synuclein alpha interacting protein [Source:HGNC Symbol;Acc:HGNC:11139]	4	5	7
5069	PAPPA	pappalysin 1 [Source:HGNC Symbol;Acc:HGNC:8602]	4	5	9
147381	CBLN2	cerebellin 2 precursor [Source:HGNC Symbol;Acc:HGNC:1544]	4	5
7092	TLL1	tolloid like 1 [Source:HGNC Symbol;Acc:HGNC:11843]	4	5
1903	S1PR3	sphingosine-1-phosphate receptor 3 [Source:HGNC Symbol;Acc:HGNC:3167]	4	5	9
5156	PDGFRA	platelet derived growth factor receptor alpha [Source:HGNC Symbol;Acc:HGNC:8803]	4	5	9
5228	PGF	placental growth factor [Source:HGNC Symbol;Acc:HGNC:8893]	4	5
147372	CCBE1	collagen and calcium binding EGF domains 1 [Source:HGNC Symbol;Acc:HGNC:29426]	4	5
26011	TENM4	teneurin transmembrane protein 4 [Source:HGNC Symbol;Acc:HGNC:29945]	4	5
127435	PODN	podocan [Source:HGNC Symbol;Acc:HGNC:23174]	4	5
2619	GAS1	growth arrest specific 1 [Source:HGNC Symbol;Acc:HGNC:4165]	4	5
79822	ARHGAP28	Rho GTPase activating protein 28 [Source:HGNC Symbol;Acc:HGNC:25509]	4	5
6581	SLC22A3	solute carrier family 22 member 3 [Source:HGNC Symbol;Acc:HGNC:10967]	4	5
284654	RSPO1	R-spondin 1 [Source:HGNC Symbol;Acc:HGNC:21679]	4	5
348	APOE	apolipoprotein E [Source:HGNC Symbol;Acc:HGNC:613]	4	6	7
54463	RETREG1	reticulophagy regulator 1 [Source:HGNC Symbol;Acc:HGNC:25964]	4	6
57451	TENM2	teneurin transmembrane protein 2 [Source:HGNC Symbol;Acc:HGNC:29943]	4	6
23452	ANGPTL2	angiopoietin like 2 [Source:HGNC Symbol;Acc:HGNC:490]	4	7	9
4854	NOTCH3	notch receptor 3 [Source:HGNC Symbol;Acc:HGNC:7883]	4	7	9
5168	ENPP2	ectonucleotide pyrophosphatase/phosphodiesterase 2 [Source:HGNC Symbol;Acc:HGNC:3357]	4	7
84557	MAP1LC3A	microtubule associated protein 1 light chain 3 alpha [Source:HGNC Symbol;Acc:HGNC:6838]	4	7
2052	EPHX1	epoxide hydrolase 1 [Source:HGNC Symbol;Acc:HGNC:3401]	4	7
8828	NRP2	neuropilin 2 [Source:HGNC Symbol;Acc:HGNC:8005]	4	9
9369	NRXN3	neurexin 3 [Source:HGNC Symbol;Acc:HGNC:8010]	4
166336	PRICKLE2	prickle planar cell polarity protein 2 [Source:HGNC Symbol;Acc:HGNC:20340]	4
8499	PPFIA2	PTPRF interacting protein alpha 2 [Source:HGNC Symbol;Acc:HGNC:9246]	4
1293	COL6A3	collagen type VI alpha 3 chain [Source:HGNC Symbol;Acc:HGNC:2213]	4	9
79827	CLMP	CXADR like membrane protein [Source:HGNC Symbol;Acc:HGNC:24039]	4
116535	MRGPRF	MAS related GPR family member F [Source:HGNC Symbol;Acc:HGNC:24828]	4
168667	BMPER	BMP binding endothelial regulator [Source:HGNC Symbol;Acc:HGNC:24154]	4
27289	RND1	Rho family GTPase 1 [Source:HGNC Symbol;Acc:HGNC:18314]	4
339524	LINC01140	long intergenic non-protein coding RNA 1140 [Source:HGNC Symbol;Acc:HGNC:27922]	4
9469	CHST3	carbohydrate sulfotransferase 3 [Source:HGNC Symbol;Acc:HGNC:1971]	4
3977	LIFR	LIF receptor subunit alpha [Source:HGNC Symbol;Acc:HGNC:6597]	4
1003	CDH5	cadherin 5 [Source:HGNC Symbol;Acc:HGNC:1764]	4
10266	RAMP2	receptor activity modifying protein 2 [Source:HGNC Symbol;Acc:HGNC:9844]	4
8322	FZD4	frizzled class receptor 4 [Source:HGNC Symbol;Acc:HGNC:4042]	4
79642	ARSJ	arylsulfatase family member J [Source:HGNC Symbol;Acc:HGNC:26286]	4
1947	EFNB1	ephrin B1 [Source:HGNC Symbol;Acc:HGNC:3226]	4
57569	ARHGAP20	Rho GTPase activating protein 20 [Source:HGNC Symbol;Acc:HGNC:18357]	4
25878	MXRA5	matrix remodeling associated 5 [Source:HGNC Symbol;Acc:HGNC:7539]	4
114897	C1QTNF1	C1q and TNF related 1 [Source:HGNC Symbol;Acc:HGNC:14324]	4
91653	BOC	BOC cell adhesion associated	4
5602	MAPK10	mitogen-activated protein kinase 10 [Source:HGNC Symbol;Acc:HGNC:6872]	4
6096	RORB	RAR related orphan receptor B [Source:HGNC Symbol;Acc:HGNC:10259]	4
83468	GLT8D2	glycosyltransferase 8 domain containing 2 [Source:HGNC Symbol;Acc:HGNC:24890]	4
4681	NBL1	NBL1	4
25903	OLFML2B	olfactomedin like 2B [Source:HGNC Symbol;Acc:HGNC:24558]	4
283298	OLFML1	olfactomedin like 1 [Source:HGNC Symbol;Acc:HGNC:24473]	4
387496	RASL11A	RAS like family 11 member A [Source:HGNC Symbol;Acc:HGNC:23802]	4
118738	ZNF488	zinc finger protein 488 [Source:HGNC Symbol;Acc:HGNC:23535]	4
387509	GPR153	G protein-coupled receptor 153 [Source:HGNC Symbol;Acc:HGNC:23618]	4
64900	LPIN3	lipin 3 [Source:HGNC Symbol;Acc:HGNC:14451]	4
4613	MYCN	MYCN proto-oncogene	5	6	7
55647	RAB20	RAB20	5	6	7
10365	KLF2	Kruppel like factor 2 [Source:HGNC Symbol;Acc:HGNC:6347]	5	6
83716	CRISPLD2	cysteine rich secretory protein LCCL domain containing 2 [Source:HGNC Symbol;Acc:HGNC:25248]	5	7	9
84632	AFAP1L2	actin filament associated protein 1 like 2 [Source:HGNC Symbol;Acc:HGNC:25901]	5	7
56265	CPXM1	carboxypeptidase X	5	7
57214	CEMIP	cell migration inducing hyaluronidase 1 [Source:HGNC Symbol;Acc:HGNC:29213]	5	9
9644	SH3PXD2A	SH3 and PX domains 2A [Source:HGNC Symbol;Acc:HGNC:23664]	5	9
133522	PPARGC1B	PPARG coactivator 1 beta [Source:HGNC Symbol;Acc:HGNC:30022]	5
27092	CACNG4	calcium voltage-gated channel auxiliary subunit gamma 4 [Source:HGNC Symbol;Acc:HGNC:1408]	5
401190	RGS7BP	regulator of G protein signaling 7 binding protein [Source:HGNC Symbol;Acc:HGNC:23271]	5
163782	KANK4	KN motif and ankyrin repeat domains 4 [Source:HGNC Symbol;Acc:HGNC:27263]	5
162073	ITPRIPL2	ITPRIP like 2 [Source:HGNC Symbol;Acc:HGNC:27257]	5
83872	HMCN1	hemicentin 1 [Source:HGNC Symbol;Acc:HGNC:19194]	5
3269	HRH1	histamine receptor H1 [Source:HGNC Symbol;Acc:HGNC:5182]	5
84709	MGARP	mitochondria localized glutamic acid rich protein [Source:HGNC Symbol;Acc:HGNC:29969]	5
8825	LIN7A	lin-7 homolog A	5
57687	VAT1L	vesicle amine transport 1 like [Source:HGNC Symbol;Acc:HGNC:29315]	5
18	ABAT	4-aminobutyrate aminotransferase [Source:HGNC Symbol;Acc:HGNC:23]	5
126669	SHE	Src homology 2 domain containing E [Source:HGNC Symbol;Acc:HGNC:27004]	5
53405	CLIC5	chloride intracellular channel 5 [Source:HGNC Symbol;Acc:HGNC:13517]	5
4881	NPR1	natriuretic peptide receptor 1 [Source:HGNC Symbol;Acc:HGNC:7943]	5
134265	AFAP1L1	actin filament associated protein 1 like 1 [Source:HGNC Symbol;Acc:HGNC:26714]	5
126326	GIPC3	GIPC PDZ domain containing family member 3 [Source:HGNC Symbol;Acc:HGNC:18183]	5
11096	ADAMTS5	ADAM metallopeptidase with thrombospondin type 1 motif 5 [Source:HGNC Symbol;Acc:HGNC:221]	5
84034	EMILIN2	elastin microfibril interfacer 2 [Source:HGNC Symbol;Acc:HGNC:19881]	5
54796	BNC2	basonuclin 2 [Source:HGNC Symbol;Acc:HGNC:30988]	5
651746	ANKRD33B	ankyrin repeat domain 33B [Source:HGNC Symbol;Acc:HGNC:35240]	5
1464	CSPG4	chondroitin sulfate proteoglycan 4 [Source:HGNC Symbol;Acc:HGNC:2466]	5
112399	EGLN3	egl-9 family hypoxia inducible factor 3 [Source:HGNC Symbol;Acc:HGNC:14661]	5
55521	TRIM36	tripartite motif containing 36 [Source:HGNC Symbol;Acc:HGNC:16280]	5
8900	CCNA1	cyclin A1 [Source:HGNC Symbol;Acc:HGNC:1577]	5
9725	TMEM63A	transmembrane protein 63A [Source:HGNC Symbol;Acc:HGNC:29118]	5
84929	FIBCD1	fibrinogen C domain containing 1 [Source:HGNC Symbol;Acc:HGNC:25922]	5
5924	RASGRF2	Ras protein specific guanine nucleotide releasing factor 2 [Source:HGNC Symbol;Acc:HGNC:9876]	5
113	ADCY7	adenylate cyclase 7 [Source:HGNC Symbol;Acc:HGNC:238]	5
80036	TRPM3	transient receptor potential cation channel subfamily M member 3 [Source:HGNC Symbol;Acc:HGNC:17992]	5
6405	SEMA3F	semaphorin 3F [Source:HGNC Symbol;Acc:HGNC:10728]	5
10021	HCN4	hyperpolarization activated cyclic nucleotide gated potassium channel 4 [Source:HGNC Symbol;Acc:HGNC:16882]	5
170689	ADAMTS15	ADAM metallopeptidase with thrombospondin type 1 motif 15 [Source:HGNC Symbol;Acc:HGNC:16305]	5
126567	C2CD4C	C2 calcium dependent domain containing 4C [Source:HGNC Symbol;Acc:HGNC:29417]	5
90139	TSPAN18	tetraspanin 18 [Source:HGNC Symbol;Acc:HGNC:20660]	5
7781	SLC30A3	solute carrier family 30 member 3 [Source:HGNC Symbol;Acc:HGNC:11014]	5
84913	ATOH8	atonal bHLH transcription factor 8 [Source:HGNC Symbol;Acc:HGNC:24126]	5
10882	C1QL1	complement C1q like 1 [Source:HGNC Symbol;Acc:HGNC:24182]	5
170691	ADAMTS17	ADAM metallopeptidase with thrombospondin type 1 motif 17 [Source:HGNC Symbol;Acc:HGNC:17109]	5
201501	ZBTB7C	zinc finger and BTB domain containing 7C [Source:HGNC Symbol;Acc:HGNC:31700]	5
11213	IRAK3	interleukin 1 receptor associated kinase 3 [Source:HGNC Symbol;Acc:HGNC:17020]	5
11226	GALNT6	polypeptide N-acetylgalactosaminyltransferase 6 [Source:HGNC Symbol;Acc:HGNC:4128]	5
400120	SERTM1	serine rich and transmembrane domain containing 1 [Source:HGNC Symbol;Acc:HGNC:33792]	5
23416	KCNH3	potassium voltage-gated channel subfamily H member 3 [Source:HGNC Symbol;Acc:HGNC:6252]	5
392617	ELFN1	extracellular leucine rich repeat and fibronectin type III domain containing 1 [Source:HGNC Symbol;Acc:HGNC:33154]	5
102724560	CBSL	cystathionine beta-synthase like [Source:HGNC Symbol;Acc:HGNC:51829]	5
5106	PCK2	phosphoenolpyruvate carboxykinase 2	6	7	9
687	KLF9	Kruppel like factor 9 [Source:HGNC Symbol;Acc:HGNC:1123]	6	7	9
4052	LTBP1	latent transforming growth factor beta binding protein 1 [Source:HGNC Symbol;Acc:HGNC:6714]	6	7	9
272	AMPD3	adenosine monophosphate deaminase 3 [Source:HGNC Symbol;Acc:HGNC:470]	6	7
395	ARHGAP6	Rho GTPase activating protein 6 [Source:HGNC Symbol;Acc:HGNC:676]	6	7
7075	TIE1	tyrosine kinase with immunoglobulin like and EGF like domains 1 [Source:HGNC Symbol;Acc:HGNC:11809]	6	7
27086	FOXP1	forkhead box P1 [Source:HGNC Symbol;Acc:HGNC:3823]	6	7
27244	SESN1	sestrin 1 [Source:HGNC Symbol;Acc:HGNC:21595]	6	7
5025	P2RX4	purinergic receptor P2X 4 [Source:HGNC Symbol;Acc:HGNC:8535]	6	7
89796	NAV1	neuron navigator 1 [Source:HGNC Symbol;Acc:HGNC:15989]	6	9
10370	CITED2	Cbp/p300 interacting transactivator with Glu/Asp rich carboxy-terminal domain 2 [Source:HGNC Symbol;Acc:HGNC:1987]	6
5567	PRKACB	protein kinase cAMP-activated catalytic subunit beta [Source:HGNC Symbol;Acc:HGNC:9381]	6
6546	SLC8A1	solute carrier family 8 member A1 [Source:HGNC Symbol;Acc:HGNC:11068]	6
9723	SEMA3E	semaphorin 3E [Source:HGNC Symbol;Acc:HGNC:10727]	6
9863	MAGI2	membrane associated guanylate kinase	6
1951	CELSR3	cadherin EGF LAG seven-pass G-type receptor 3 [Source:HGNC Symbol;Acc:HGNC:3230]	6
4638	MYLK	myosin light chain kinase [Source:HGNC Symbol;Acc:HGNC:7590]	6	9
2882	GPX7	glutathione peroxidase 7 [Source:HGNC Symbol;Acc:HGNC:4559]	6	9
5997	RGS2	regulator of G protein signaling 2 [Source:HGNC Symbol;Acc:HGNC:9998]	6
51523	CXXC5	CXXC finger protein 5 [Source:HGNC Symbol;Acc:HGNC:26943]	6
2022	ENG	endoglin [Source:HGNC Symbol;Acc:HGNC:3349]	6
7832	BTG2	BTG anti-proliferation factor 2 [Source:HGNC Symbol;Acc:HGNC:1131]	6
1000	CDH2	cadherin 2 [Source:HGNC Symbol;Acc:HGNC:1759]	6
8436	CAVIN2	caveolae associated protein 2 [Source:HGNC Symbol;Acc:HGNC:10690]	6
4038	LRP4	LDL receptor related protein 4 [Source:HGNC Symbol;Acc:HGNC:6696]	6
6533	SLC6A6	solute carrier family 6 member 6 [Source:HGNC Symbol;Acc:HGNC:11052]	6
23566	LPAR3	lysophosphatidic acid receptor 3 [Source:HGNC Symbol;Acc:HGNC:14298]	6
9289	ADGRG1	adhesion G protein-coupled receptor G1 [Source:HGNC Symbol;Acc:HGNC:4512]	6
146198	ZFP90	ZFP90 zinc finger protein [Source:HGNC Symbol;Acc:HGNC:23329]	6
2044	EPHA5	EPH receptor A5 [Source:HGNC Symbol;Acc:HGNC:3389]	6
10231	RCAN2	regulator of calcineurin 2 [Source:HGNC Symbol;Acc:HGNC:3041]	6
8809	IL18R1	interleukin 18 receptor 1 [Source:HGNC Symbol;Acc:HGNC:5988]	6
161882	ZFPM1	zinc finger protein	6
339665	SLC35E4	solute carrier family 35 member E4 [Source:HGNC Symbol;Acc:HGNC:17058]	6
1850	DUSP8	dual specificity phosphatase 8 [Source:HGNC Symbol;Acc:HGNC:3074]	6
9099	USP2	ubiquitin specific peptidase 2 [Source:HGNC Symbol;Acc:HGNC:12618]	6
6324	SCN1B	sodium voltage-gated channel beta subunit 1 [Source:HGNC Symbol;Acc:HGNC:10586]	6
7016	TESK1	testis associated actin remodelling kinase 1 [Source:HGNC Symbol;Acc:HGNC:11731]	6
7984	ARHGEF5	Rho guanine nucleotide exchange factor 5 [Source:HGNC Symbol;Acc:HGNC:13209]	6
6319	SCD	stearoyl-CoA desaturase [Source:HGNC Symbol;Acc:HGNC:10571]	6
10771	ZMYND11	zinc finger MYND-type containing 11 [Source:HGNC Symbol;Acc:HGNC:16966]	6
285313	IGSF10	immunoglobulin superfamily member 10 [Source:HGNC Symbol;Acc:HGNC:26384]	6
10659	CELF2	CUGBP Elav-like family member 2 [Source:HGNC Symbol;Acc:HGNC:2550]	7
54331	GNG2	G protein subunit gamma 2 [Source:HGNC Symbol;Acc:HGNC:4404]	7
9750	RIPOR2	RHO family interacting cell polarization regulator 2 [Source:HGNC Symbol;Acc:HGNC:13872]	7
51380	CSAD	cysteine sulfinic acid decarboxylase [Source:HGNC Symbol;Acc:HGNC:18966]	7
284161	GDPD1	glycerophosphodiester phosphodiesterase domain containing 1 [Source:HGNC Symbol;Acc:HGNC:20883]	7
4013	VWA5A	von Willebrand factor A domain containing 5A [Source:HGNC Symbol;Acc:HGNC:6658]	7
7067	THRA	thyroid hormone receptor alpha [Source:HGNC Symbol;Acc:HGNC:11796]	7
3732	CD82	CD82 molecule [Source:HGNC Symbol;Acc:HGNC:6210]	7	9
114907	FBXO32	F-box protein 32 [Source:HGNC Symbol;Acc:HGNC:16731]	7	9
94031	HTRA3	HtrA serine peptidase 3 [Source:HGNC Symbol;Acc:HGNC:30406]	7	9
8863	PER3	period circadian regulator 3 [Source:HGNC Symbol;Acc:HGNC:8847]	7
7881	KCNAB1	potassium voltage-gated channel subfamily A member regulatory beta subunit 1 [Source:HGNC Symbol;Acc:HGNC:6228]	7
10742	RAI2	retinoic acid induced 2 [Source:HGNC Symbol;Acc:HGNC:9835]	7
115330	GPR146	G protein-coupled receptor 146 [Source:HGNC Symbol;Acc:HGNC:21718]	7
6948	TCN2	transcobalamin 2 [Source:HGNC Symbol;Acc:HGNC:11653]	7
586	BCAT1	branched chain amino acid transaminase 1 [Source:HGNC Symbol;Acc:HGNC:976]	7
8642	DCHS1	dachsous cadherin-related 1 [Source:HGNC Symbol;Acc:HGNC:13681]	7
4311	MME	membrane metalloendopeptidase [Source:HGNC Symbol;Acc:HGNC:7154]	7
130367	SGPP2	sphingosine-1-phosphate phosphatase 2 [Source:HGNC Symbol;Acc:HGNC:19953]	7
284611	FAM102B	family with sequence similarity 102 member B [Source:HGNC Symbol;Acc:HGNC:27637]	7
3730	ANOS1	anosmin 1 [Source:HGNC Symbol;Acc:HGNC:6211]	7
9820	CUL7	cullin 7 [Source:HGNC Symbol;Acc:HGNC:21024]	7
56967	C14orf132	chromosome 14 open reading frame 132 [Source:HGNC Symbol;Acc:HGNC:20346]	7
403313	PLPP6	phospholipid phosphatase 6 [Source:HGNC Symbol;Acc:HGNC:23682]	7
11151	CORO1A	coronin 1A [Source:HGNC Symbol;Acc:HGNC:2252]	7
9056	SLC7A7	solute carrier family 7 member 7 [Source:HGNC Symbol;Acc:HGNC:11065]	7
1760	DMPK	DM1 protein kinase [Source:HGNC Symbol;Acc:HGNC:2933]	7
929	CD14	CD14 molecule [Source:HGNC Symbol;Acc:HGNC:1628]	7
7148	TNXB	tenascin XB [Source:HGNC Symbol;Acc:HGNC:11976]	7
10267	RAMP1	receptor activity modifying protein 1 [Source:HGNC Symbol;Acc:HGNC:9843]	7
338382	RAB7B	RAB7B	7
9242	MSC	musculin [Source:HGNC Symbol;Acc:HGNC:7321]	7
84264	HAGHL	hydroxyacylglutathione hydrolase like [Source:HGNC Symbol;Acc:HGNC:14177]	7
441376	AARD	alanine and arginine rich domain containing protein [Source:HGNC Symbol;Acc:HGNC:33842]	7
6695	SPOCK1	SPARC (osteonectin)	9
25907	TMEM158	transmembrane protein 158 (gene/pseudogene) [Source:HGNC Symbol;Acc:HGNC:30293]	9
6781	STC1	stanniocalcin 1 [Source:HGNC Symbol;Acc:HGNC:11373]	9
29968	PSAT1	phosphoserine aminotransferase 1 [Source:HGNC Symbol;Acc:HGNC:19129]	9
875	CBS	cystathionine beta-synthase [Source:HGNC Symbol;Acc:HGNC:1550]	9
56925	LXN	latexin [Source:HGNC Symbol;Acc:HGNC:13347]	9
8840	CCN4	cellular communication network factor 4 [Source:HGNC Symbol;Acc:HGNC:12769]	9
10797	MTHFD2	methylenetetrahydrofolate dehydrogenase (NADP+ dependent) 2	9
4130	MAP1A	microtubule associated protein 1A [Source:HGNC Symbol;Acc:HGNC:6835]	9
6515	SLC2A3	solute carrier family 2 member 3 [Source:HGNC Symbol;Acc:HGNC:11007]	9
1728	NQO1	NAD(P)H quinone dehydrogenase 1 [Source:HGNC Symbol;Acc:HGNC:2874]	9
6624	FSCN1	fascin actin-bundling protein 1 [Source:HGNC Symbol;Acc:HGNC:11148]	9
90	ACVR1	activin A receptor type 1 [Source:HGNC Symbol;Acc:HGNC:171]	9
160428	ALDH1L2	aldehyde dehydrogenase 1 family member L2 [Source:HGNC Symbol;Acc:HGNC:26777]	9
23446	SLC44A1	solute carrier family 44 member 1 [Source:HGNC Symbol;Acc:HGNC:18798]	9
9181	ARHGEF2	Rho/Rac guanine nucleotide exchange factor 2 [Source:HGNC Symbol;Acc:HGNC:682]	9
23111	SPART	spartin [Source:HGNC Symbol;Acc:HGNC:18514]	9
22801	ITGA11	integrin subunit alpha 11 [Source:HGNC Symbol;Acc:HGNC:6136]	9
11237	RNF24	ring finger protein 24 [Source:HGNC Symbol;Acc:HGNC:13779]	9
9536	PTGES	prostaglandin E synthase [Source:HGNC Symbol;Acc:HGNC:9599]	9
25966	C2CD2	C2 calcium dependent domain containing 2 [Source:HGNC Symbol;Acc:HGNC:1266]	9
11260	XPOT	exportin for tRNA [Source:HGNC Symbol;Acc:HGNC:12826]	9
6175	RPLP0	ribosomal protein lateral stalk subunit P0 [Source:HGNC Symbol;Acc:HGNC:10371]	9
put two tables togetehr

## Sheet: Table S7
Table S7. The list of selected DE genes with known function in epithelial to mesenchymal transition is shown.
gene symbol	log2FoldChange	padj	Function in EMT	reference (DOI)	Endometriosis	reference (DOI)
CDH1	-2.01655	5.49773e-50	cadherin switch in EMT	10.1016/B978-0-12-394311-8.00014-5	cadherin switch takes place in EM lesions	10.1186/s12958-015-0063-7
CDH2	-1.15893	5.61707e-184	cadherin switch in EMT	10.1016/B978-0-12-394311-8.00014-5	cadherin swithch take place in EM lesions	10.1186/s12958-015-0063-7
FOXO1	-0.840114	1.06058e-08	inhibit EMT in several cancers	10.18632/oncotarget.13786	reduced expression in EM lesion associated with regulation of cell survival	10.1016/j.ncrna.2021.02.002
VCAM1	-0.699651	2.59759e-58	activates EMT in several cancers	10.3389/fonc.2020.01066	increased expression in EM lesion EMT associated gene	10.1038/s41598-020-65606-9
SOX4	0.765593	2.601e-26	master regulator of EMT	10.1016/j.ccr.2013.04.020.	not known	not known
TGFb2	1.43739	3.87218e-32	EMT inducer in cancer	10.1038/s41598-020-67325-7	involved in EM lesion formation	10.1093/humrep/dep382
KRT7	-0.583006	9.57414e-38	promote EMT in various types of cancers	10.3892/or.2020.7886	elevated in endometrium of woman with EM	10.1016/j.ygyno.2018.04.417
KRT19	-0.872536	5.66096e-154	promote EMT in various types of cancers	10.1042/BSR20193468	down-regulated in EM	10.1038/s41598-020-65606-9
